# Supplementary material for: Test of Arabidopsis Space Transcriptome: A Discovery Environment to Explore Multiple Plant Biology Spaceflight Experiments
Source: Front Plant Sci. 2020 Mar 4;11:147. doi: 10.3389/fpls.2020.00147 (PMC7076552; doi:10.3389/fpls.2020.00147)
Supplement: Supplementary file 2 [file DataSheet_2.csv]

Accession	Title	Weblink	Binomial name	Factor Summary	Gravity	Radiation	Stress exposure duration	Stress magnitude	Age	Development stage (DRB human readable)	Growth environment	Vehical	Organ or cell type	Ecotype	Genotype	Lighting summary	Lighting details	Time series or gradient	Average Temperature (C)	All Assay Summary	Assay 1 Summary	Assay 1 platform	Assay 2 Summary	Assay2 platform	Reference	Ref Year
GLDS-208	Comparative gene expression analysis in the Arabidopsis thaliana root apex using RNA-seq and microarray transcriptome profiles (microarray)	https://genelab-data.ndc.nasa.gov/genelab/accession/GLDS-208	Arabidopsis thaliana	Root stage of development and transcriptional analysis method	Terrestrial	Terrestrial	8 days		8 days	8 day old seedlings root tip meristem and elongation zone	Lab: Petri dish	Earth	Root tip	Col0	WT	White light	24 hour white light	Single time point	18-20	SMARTseq Transcription Profiling	RNAseq using SMARTSeq V4 ultra low input RNA kit	Illumina	Microarray	Affymetrix	Krishnamurthy et al.,	2018
GLDS-120	Genetic dissection of the Arabidopsis spaceflight transcriptome: Are some responses dispensable for the physiological adaptation of plants to spaceflight?	https://genelabdata.ndc.nasa.gov/genelab/accession/GLDS120	Arabidopsis thaliana	Ecotype, Spaceflight, Gravity, Radiation, EFO:light	Microgravity	Cosmic radiation	11 days	Unknown Radiation on ISS	11 days	11 day old seedlings root tips	CARA: Petri dish	ISS	Root tip	WS0	WT	Cabin light	24h low light	Single time point	22-24	SMARTseq Transcription Profiling	RNAseq using SMARTSeq V4 ultra low input RNA kit	Illumina			Paul et al.,	2017
GLDS-120	Genetic dissection of the Arabidopsis spaceflight transcriptome: Are some responses dispensable for the physiological adaptation of plants to spaceflight?	https://genelabdata.ndc.nasa.gov/genelab/accession/GLDS120	Arabidopsis thaliana	Ecotype, Spaceflight, Gravity, Radiation, EFO:light	Microgravity	Cosmic radiation	11 days	Unknown Radiation on ISS	11 days	11 day old seedlings root tips	CARA: Petri dish	ISS	Root tip	Col0	WT	Cabin light	24h low light	Single time point	22-24	SMARTseq Transcription Profiling	RNAseq using SMARTSeq V4 ultra low input RNA kit	Illumina			Paul et al.,	2017
GLDS-120	Genetic dissection of the Arabidopsis spaceflight transcriptome: Are some responses dispensable for the physiological adaptation of plants to spaceflight?	https://genelabdata.ndc.nasa.gov/genelab/accession/GLDS120	Arabidopsis thaliana	Genotype, Spaceflight, Gravity, Radiation, EFO:light	Microgravity	Cosmic radiation	11 days	Unknown Radiation on ISS	11 days	11 day old seedlings root tips	CARA: Petri dish	ISS	Root tip	Col0	phyD	Cabin light	24h low light	Single time point	22-24	SMARTseq Transcription Profiling	RNAseq using SMARTSeq V4 ultra low input RNA kit	Illumina			Paul et al.,	2017
GLDS-120	Genetic dissection of the Arabidopsis spaceflight transcriptome: Are some responses dispensable for the physiological adaptation of plants to spaceflight?	https://genelabdata.ndc.nasa.gov/genelab/accession/GLDS120	Arabidopsis thaliana	Ecotype, Spaceflight, uGravity, Radiation	Microgravity	Cosmic radiation	11 days	Unknown Radiation on ISS	11 days	Etiolated 11 day old seedlings root tips	CARA: Petri dish	ISS	Root tip	WS0	WT	Dark	Dark	Single time point	22-24	SMARTseq Transcription Profiling	RNAseq using SMARTSeq V4 ultra low input RNA kit	Illumina			Paul et al.,	2017
GLDS-120	Genetic dissection of the Arabidopsis spaceflight transcriptome: Are some responses dispensable for the physiological adaptation of plants to spaceflight?	https://genelabdata.ndc.nasa.gov/genelab/accession/GLDS120	Arabidopsis thaliana	Ecotype, Spaceflight, uGravity, Radiation	Microgravity	Cosmic radiation	11 days	Unknown Radiation on ISS	11 days	Etiolated 11 day old seedlings root tips	CARA: Petri dish	ISS	Root tip	Col0	WT	Dark	Dark	Single time point	22-24	SMARTseq Transcription Profiling	RNAseq using SMARTSeq V4 ultra low input RNA kit	Illumina			Paul et al.,	2017
GLDS-120	Genetic dissection of the Arabidopsis spaceflight transcriptome: Are some responses dispensable for the physiological adaptation of plants to spaceflight?	https://genelabdata.ndc.nasa.gov/genelab/accession/GLDS120	Arabidopsis thaliana	Ecotype, Spaceflight, uGravity, Radiation	Microgravity	Cosmic radiation	11 days	Unknown Radiation on ISS	11 days	Etiolated 11 day old seedlings root tips	CARA: Petri dish	ISS	Root tip	Col0	phyD	Dark	Dark	Single time point	22-24	SMARTseq Transcription Profiling	RNAseq using SMARTSeq V4 ultra low input RNA kit	Illumina			Paul et al.,	2017
GLDS-121	Biological Research in Canisters16 (BRIC16): Investigations of the plant cytoskeleton in microgravity with gene profiling and cytochemistry	https://genelabdata.ndc.nasa.gov/genelab/accession/GLDS121	Arabidopsis thaliana	Ecotype, Spaceflight, uGravity, Radiation	Microgravity	Cosmic radiation	14 days		14 days	Etiolated 14 day old seelings	BRIC	Space Shuttle	Etiolated seedling	Col0	WT	Dark	Dark	Single time point	"Ambient shuttle"	Microarray Transcription Profiling	Microarray	Affymetrix			Johnson et al.,	2017
GLDS-136	Dissecting Low Atmospheric Pressure Stress: Transcriptome Responses to the Components of Hypobaria in Arabidopsis	https://genelabdata.ndc.nasa.gov/genelab/accession/GLDS136	Arabidopsis thaliana	Atmospheric Pressure	Terrestrial	Terrestrial	10 days		10 days	10 day old seedling, 2 rosette leaves >1 mm in length	VEGGIE: Petri dish	Low Pressure Growth Chambers	Roots, shoots	WS0	WT	White light	24 hour light	5 and 10 day	"Ambient Terrestrial"	Microarray Transcription Profiling	Microarray	Affymetrix			Zhou et al.,	2017
GLDS-147	Arg1 functions in the physiological adaptation of undifferentiated plant cells to spaceflight	https://genelabdata.ndc.nasa.gov/genelab/accession/GLDS147	Arabidopsis thaliana	Cell culture, Genotype, Spaceflight, uGravity, Radiation,	Microgravity	Cosmic radiation	10 days	Unknown Radiation on ISS	12 days	12 day old cell culture	BRIC	ISS	Cell cultures	Col0	arg1	Dark	Dark	Single time point	"Ambient ISS"	Microarray Transcription Profiling	Microarray	Affymetrix			Zupanska et al.,	2017
GLDS-16	Spaceflight adaptation requires organ specific alterations in the proteomes of Arabidopsis	https://genelabdata.ndc.nasa.gov/genelab/accession/GLDS16	Arabidopsis thaliana	Organ Specific, Ecotype, Spaceflight, uGravity, Radiation	Microgravity	Cosmic radiation	12 days	Unknown Radiation on ISS	12 days	12 day seedling roots and shoots	ABRS	ISS	Roots, shoots	Col0 & WS0 mixed	WT	White light	24 hour light	Single time point	"Ambient ISS"	Protein Profiling	Mass Spectrometry	iTRAQ			Ferl et al.,	2015
GLDS-17	Transcription Profiling by array of the response of Arabidopsis cultivar Columbia etiolated seedlings and undifferentiated tissue culture cells to the spaceflight environment	https://genelabdata.ndc.nasa.gov/genelab/accession/GLDS17	Arabidopsis thaliana	Ecotype, Spaceflight, uGravity, Radiation	Microgravity	Cosmic radiation	12 days		12 days	Etiolated 12 day old seedlings	BRIC	Space Shuttle	Etiolated seedling	Col0	WT	Dark	Dark	Single time point	"Ambient shuttle"	Microarray Transcription Profiling	Microarray	Affymetrix			Paul et al.,	2012
GLDS-17	Transcription Profiling by array of the response of Arabidopsis cultivar Columbia etiolated seedlings and undifferentiated tissue culture cells to the spaceflight environment	https://genelabdata.ndc.nasa.gov/genelab/accession/GLDS17	Arabidopsis thaliana	Cell culture, Genotype, Spaceflight, uGravity, Radiation,	Microgravity	Cosmic radiation	12 days		12 days	12 day old cell culture	BRIC	Space Shuttle	Cell cultures	Col0	WT	Dark	Dark	Single time point	"Ambient shuttle"	Microarray Transcription Profiling	Microarray	Affymetrix			Paul et al.,	2012
GLDS-37	Variation in the transcriptome of different ecotypes of Arabidopsis thaliana reveals signatures of oxidative stress in plant responses to spaceflight	https://genelabdata.ndc.nasa.gov/genelab/accession/GLDS37	Arabidopsis thaliana	Ecotype, Spaceflight, uGravity, Radiation	Microgravity	Cosmic radiation	8 days	Unknown Radiation on ISS	8 days	Etiolated 8 day old seedlings	BRIC	ISS	Etiolated seedling	Col0	WT	Dark	Dark	Single time point	22-24	RNAseq Transcription Profiling	RNAseq	Illumina			Choi et al.,	2019
GLDS-37	Variation in the transcriptome of different ecotypes of Arabidopsis thaliana reveals signatures of oxidative stress in plant responses to spaceflight	https://genelabdata.ndc.nasa.gov/genelab/accession/GLDS37	Arabidopsis thaliana	Ecotype, Spaceflight, uGravity, Radiation	Microgravity	Cosmic radiation	8 days	Unknown Radiation on ISS	8 days	Etiolated 8 day old seedlings	BRIC	ISS	Etiolated seedling	WS0	WT	Dark	Dark	Single time point	22-24	RNAseq Transcription Profiling	RNAseq	Illumina			Choi et al.,	2019
GLDS-37	Variation in the transcriptome of different ecotypes of Arabidopsis thaliana reveals signatures of oxidative stress in plant responses to spaceflight	https://genelabdata.ndc.nasa.gov/genelab/accession/GLDS37	Arabidopsis thaliana	Ecotype, Spaceflight, uGravity, Radiation	Microgravity	Cosmic radiation	8 days	Unknown Radiation on ISS	8 days	Etiolated 8 day old seedlings	BRIC	ISS	Etiolated seedling	Ler0	WT	Dark	Dark	Single time point	22-24	RNAseq Transcription Profiling	RNAseq	Illumina			Choi et al.,	2019
GLDS-37	Variation in the transcriptome of different ecotypes of Arabidopsis thaliana reveals signatures of oxidative stress in plant responses to spaceflight	https://genelabdata.ndc.nasa.gov/genelab/accession/GLDS37	Arabidopsis thaliana	Ecotype, Spaceflight, uGravity, Radiation	Microgravity	Cosmic radiation	8 days	Unknown Radiation on ISS	8 days	Etiolated 8 day old seedlings	BRIC	ISS	Etiolated seedling	Cvi0	WT	Dark	Dark	Single time point	22-24	RNAseq Transcription Profiling	RNAseq	Illumina			Choi et al.,	2019
GLDS-38	Proteomics and Transcriptomics analysis of Arabidopsis Seedlings in Microgravity	https://genelabdata.ndc.nasa.gov/genelab/accession/GLDS38	Arabidopsis thaliana	BRIC Hardware Response	Microgravity	Cosmic radiation	3 days	Unknown Radiation on ISS	3 days	Etiolated 3 day old seedlings	BRIC	ISS	Etiolated seedling	Col0	WT	Dark	Dark	Single time point	24.062-25.61	RNAseq Transcription and Proteomic Profiling	RNAseq	Illumina	Protein Profiling	ITRAQ	Basu et al.,	2017
GLDS-38	Proteomics and Transcriptomics analysis of Arabidopsis Seedlings in Microgravity	https://genelabdata.ndc.nasa.gov/genelab/accession/GLDS38	Arabidopsis thaliana	Preservation method	Terrestrial	Terrestrial	3 days		3 days	Radical, hypocotyl and cotyledons emerged from seed coat.	VEGGIE: Petri dish	Earth	Etiolated seedling	Col0	WT	Dark	Dark	Single time point	24-25.5	RNAseq Transcription and Proteomic Profiling	RNAseq	Illumina	Protein Profiling	ITRAQ	Kruse et al.,	2017
GLDS-38	Proteomics and Transcriptomics analysis of Arabidopsis Seedlings in Microgravity	https://genelabdata.ndc.nasa.gov/genelab/accession/GLDS38	Arabidopsis thaliana	Phosphorylation proteomics in Spaceflight	Microgravity	Cosmic radiation	3 days	Unknown Radiation on ISS	3 days	Radical, hypocotyl and cotyledons emerged from seed coat.	BRIC	ISS	Etiolated seedling	Col0	WT	Dark	Dark	Single time point	24.062-25.61	RNAseq Transcription and Proteomic Profiling	RNAseq	Illumina	Protein Profiling	ITRAQ		2019
GLDS-44	Transcriptomics analysis of etiolated Arabidopsis thaliana seedlings in response to microgravity	https://genelabdata.ndc.nasa.gov/genelab/accession/GLDS44	Arabidopsis thaliana	Genotype, Spaceflight, uGravity, Radiation	Microgravity	Cosmic radiation	14 days		14 days	Etiolated 12 day old seedlings	BRIC	Space Shuttle	Etiolated seedling	Col0	WT	Dark	Dark	Single time point	"Ambient shuttle"	Microarray Transcription Profiling	Microarray	Affymetrix			Kwon et al.,	2015
GLDS-44	Transcriptomics analysis of etiolated Arabidopsis thaliana seedlings in response to microgravity	https://genelabdata.ndc.nasa.gov/genelab/accession/GLDS44	Arabidopsis thaliana	Genotype, Spaceflight, uGravity, Radiation	Microgravity	Cosmic radiation	14 days		14 days	Etiolated 12 day old seedlings	BRIC	Space Shuttle	Etiolated seedling	Col0	act2-3	Dark	Dark	Single time point	"Ambient shuttle"	Microarray Transcription Profiling	Microarray	Affymetrix			Kwon et al.,	2015
GLDS-45	Action of microgravity on root development	https://genelabdata.ndc.nasa.gov/genelab/accession/GLDS45	Arabidopsis thaliana	2D Clinostat, time series	Simulated microgravity	Terrestrial	4, 8 & 12 days		4, 8 & 12 days	4 day old hypocotyl and cotyledons emerged from seed coat; Day 8: cotyledons opened fully; 2 rosette leaves >1 mm in length	Lab: Petri dish	2D clinostat	Roots	Col0	WT	White light	24 hour light	4, 8 and 12 day	23-27	Microarray Transcription Profiling	Microarray	6 dyeswap			NA	2012
GLDS-46	Gamma radiation and HZE treatment of seedlings in Arabidopsis	https://genelabdata.ndc.nasa.gov/genelab/accession/GLDS46	Arabidopsis thaliana	Radiation, time series	Terrestrial	HZE & Gamma Ionizing Radiation	1 days large dose	HZE & Gamma Ionizing Radiation	5 days	5 day old seedling, cotyledons opened fully.	Lab: Petri dish	Brookhaven National Labs	Seedlings	WS0	WT	Cool white light	16 hour light	1.5, 3, 6, 12, and 24 h	20-22	Microarray Transcription Profiling	Microarray	Affymetrix			Missirian et al.,	2014
GLDS-46	Gamma radiation and HZE treatment of seedlings in Arabidopsis	https://genelabdata.ndc.nasa.gov/genelab/accession/GLDS46	Arabidopsis thaliana	Genotype, Radiation, time series	Terrestrial	HZE & Gamma Ionizing Radiation	1 days large dose	HZE & Gamma Ionizing Radiation	5 days	5 day old seedling, cotyledons opened fully.	Lab: Petri dish	Brookhaven National Labs	Seedlings	WS0	atm11	Cool white light	16 hour light	1.5, 3, 6, 12, and 24 h	20-22	Microarray Transcription Profiling	Microarray	Affymetrix			Missirian et al.,	2014
GLDS-57	RNAseq analysis identifies potential modulators of gravity response in spores of Ceratopteris (Parkeriaceae): evidence for modulation by calcium pumps and apyrase activity.	https://genelabdata.ndc.nasa.gov/genelab/accession/GLDS57	Ceratopteris richardii	Gravity related chemical blocker	Terrestrial	Terrestrial	10 hours		7 days	7 day old seedling, cotyledons opened fully, first true leaves emerging	Lab: Petri dish	Calcium blocker	Spore culture	Rice	WT	10 hour white light	Darkness until light stimuli	10h	28-30	RNAseq Transcription Profiling	RNAseq	454 Life Sciences			Bushart et al.,	2016
GLDS-59	Genomewide expression analysis of reactive oxygen species gene network in Mizuna plants grown in longterm spaceflight	https://genelabdata.ndc.nasa.gov/genelab/accession/GLDS59	Brassica rapa	Spaceflight, uGravity, Radiation	Microgravity	Cosmic radiation	27 days		27 days	Mature rosette leaves	LADA	Space Shuttle	Plants	Mizuna	Va. Nipposinica	White light	12 h day/night cycle	Single time point	23-25	RNAseq Transcription Profiling	RNAseq	Illumina			Sugimoto et al.,	2014
GLDS-7	Organ specific remodeling of the Arabidopsis transcriptome in response to spaceflight	https://genelabdata.ndc.nasa.gov/genelab/accession/GLDS7	Arabidopsis thaliana	Organ Specific, Ecotype, Spaceflight, uGravity, Radiation	Microgravity	Cosmic radiation	12 days	Unknown Radiation on ISS	12 days	12 day old seedling roots	ABRS	ISS	Roots	Col0 & WS0 mixed	WT	White light	24 hour light	Single time point	22-24	Microarray Transcription Profiling	Microarray	Affymetrix			Paul et al.,	2013
GLDS-7	Organ specific remodeling of the Arabidopsis transcriptome in response to spaceflight	https://genelabdata.ndc.nasa.gov/genelab/accession/GLDS7	Arabidopsis thaliana	Organ Specific, Ecotype, Spaceflight, uGravity, Radiation	Microgravity	Cosmic radiation	12 days	Unknown Radiation on ISS	12 days	12 day old seedling stems	ABRS	ISS	Stems	Col0 & WS0 mixed	WT	White light	24 hour light	Single time point	22-24	Microarray Transcription Profiling	Microarray	Affymetrix			Paul et al.,	2013
GLDS-7	Organ specific remodeling of the Arabidopsis transcriptome in response to spaceflight	https://genelabdata.ndc.nasa.gov/genelab/accession/GLDS7	Arabidopsis thaliana	Organ Specific, Ecotype, Spaceflight, uGravity, Radiation	Microgravity	Cosmic radiation	12 days	Unknown Radiation on ISS	12 days	12 day old seedling Leaves	ABRS	ISS	Leaves	Col0 & WS0 mixed	WT	White light	24 hour light	Single time point	22-24	Microarray Transcription Profiling	Microarray	Affymetrix			Paul et al.,	2013
GLDS-7	Organ specific remodeling of the Arabidopsis transcriptome in response to spaceflight	https://genelabdata.ndc.nasa.gov/genelab/accession/GLDS7	Arabidopsis thaliana	Ecotype, Spaceflight, uGravity, Radiation	Microgravity	Cosmic radiation	12 days	Unknown Radiation on ISS	12 days	12 day old seedling	ABRS	ISS	Seedlings	WS0	WT	White light	24 hour light	Single time point	22-24	Microarray Transcription Profiling	Microarray	Affymetrix			Paul et al.,	2013
GLDS-8	An environment with strong gravitational and magnetic field alterations synergizes to promote variations in Arabidopsis thaliana callus global transcriptional state	https://genelabdata.ndc.nasa.gov/genelab/accession/GLDS8	Arabidopsis thaliana	Magnetism, Gravity gradient	Simulated microgravity	Terrestrial	2 days	0, 1G or 2G	6 days	6 day old cell culture	Magnetic levitation	Magnetic levitation	Cell cultures	MM2D	WT	Dark	24 hour light	0, 0.1, 0.5, 1, 2G	23-25	Microarray Transcription Profiling	Microarray	Agilent			Manzano et al.,	2012
NA	Arabidopsis gene expression patterns are altered during spaceflight	NA	Arabidopsis thaliana	Launch, Spaceflight, Light grown seedlings	Microgravity	Cosmic radiation	12 days		12 days	12 day old seedlings	Plant Growth Chambers	Space Shuttle	Seedlings	Col0	WT	White light	12 h day/night cycle	Single time point	15-25	Microarray Transcription Profiling	Microarray	Affymetrix - GeneChip			Paul et al.,	2005
NA	Transcriptome analyses of Arabidopsis thaliana seedlings grown in space: implications for gravity responsive genes	NA	Arabidopsis thaliana	Spaceflight, uGravity, Centrafuge, Radiation,Light quality	Microgravity with fractional G's	Cosmic radiation	4 days	Unknown Radiation on ISS	4 days	Radical, hypocotyl and cotyledons emerged from seed coat.	EMCS	ISS	Seedlings	Ler0	WT	Red or blue LED's	24 hour light	Gravity and light gradients	23-27	Microarray Transcription Profiling	Microarray	Agilent			Correll et al.,	2013
GLDS-213	A WholeGenome Microarray Study of Arabidopsis thaliana Semisolid Callus Cultures Exposed to Microgravity and Nonmicrogravity Related Spaceflight Conditions for 5 on Board of Shenzhou 8	https://genelabdata.ndc.nasa.gov/genelab/accession/GLDS213	Arabidopsis thaliana	Spaceflight, uGravity, Radiation, Centrafuge, Light quality	Microgravity with 1G centrafuge	Cosmic radiation	5 days		16 days	16 day old cell culture	SIMBOX centrafuge vs GC	Shenzhou 8	Cell cultures	Col0	WT	White light	12 h day/night cycle	Single time point	22-24	Microarray Transcription Profiling	Microarray	Affymetrix			Fengler et al.,	2015
GLDS-213	A WholeGenome Microarray Study of Arabidopsis thaliana Semisolid Callus Cultures Exposed to Microgravity and Nonmicrogravity Related Spaceflight Conditions for 5 on Board of Shenzhou 8	https://genelabdata.ndc.nasa.gov/genelab/accession/GLDS213	Arabidopsis thaliana	Spaceflight, uGravity, Radiation, Centrafuge, Light quality	Microgravity	Cosmic radiation	5 days		16 days	16 day old cell culture	SIMBOX flight vs GC	Shenzhou 8	Cell cultures	Col0	WT	White light	12 h day/night cycle	Single time point	22-24	Microarray Transcription Profiling	Microarray	Affymetrix			Fengler et al.,	2015
GLDS-213	A WholeGenome Microarray Study of Arabidopsis thaliana Semisolid Callus Cultures Exposed to Microgravity and Nonmicrogravity Related Spaceflight Conditions for 5 on Board of Shenzhou 8	https://genelabdata.ndc.nasa.gov/genelab/accession/GLDS213	Arabidopsis thaliana	Spaceflight, uGravity, Radiation	Microgravitywith 1G centrafuge	Cosmic radiation	5 days		16 days	16 day old cell culture	SIMBOX flight vs centrafuge	Shenzhou 8	Cell cultures	Col0	WT	White light	12 h day/night cycle	Single time point	22-24	Microarray Transcription Profiling	Microarray	Affymetrix			Fengler et al.,	2015
NA	The impact of space environment on gene expression in Arabidopsis thaliana seedlings	NA	Arabidopsis thaliana	Spaceflight, uGravity, Radiation, Centrafuge, Light quality	Microgravity with 1G centrafuge	Cosmic radiation	17 days		17 days	17 day old seedling	SIMBOX centrafuge vs GC	Shenzhou 8	Seedlings	Col0	WT	White light	12 h day/night cycle	Single time point	22-24	Microarray Transcription Profiling	Microarray	Affymetrix			Li et al.,	2017
NA	The impact of space environment on gene expression in Arabidopsis thaliana seedlings	NA	Arabidopsis thaliana	Spaceflight, uGravity, Radiation, Centrafuge, Light quality	Microgravity	Cosmic radiation	17 days		17 days	17 day old seedling	SIMBOX flight vs GC	Shenzhou 8	Seedlings	Col0	WT	White light	12 h day/night cycle	Single time point	22-24	Microarray Transcription Profiling	Microarray	Affymetrix			Li et al.,	2017
NA	The impact of space environment on gene expression in Arabidopsis thaliana seedlings	NA	Arabidopsis thaliana	Spaceflight, uGravity, Radiation	Microgravity with 1G centrafuge	Cosmic radiation	17 days		17 days	17 day old seedling	SIMBOX flight vs centrafuge	Shenzhou 8	Seedlings	Col0	WT	White light	12 h day/night cycle	Single time point	22-24	Microarray Transcription Profiling	Microarray	Affymetrix			Li et al.,	2017
NA	Transcriptome Analysis of Oryza sativa Calli Under Microgravity	NA	Oryza sativa	Spaceflight, uGravity, Radiation, Centrafuge, Light quality, Rice Cell Culture	Microgravity with 1G centrafuge	Cosmic radiation	17 days		17 days	17 day old cell culture	SIMBOX centrafuge vs GC	Shenzhou 8	Cell cultures	WT	WT	White light	12 h day/night cycle	Single time point	22-24	Microarray Transcription Profiling	Microarray	Affymetrix			Jin et al.,	2015
NA	Transcriptome Analysis of Oryza sativa Calli Under Microgravity	NA	Oryza sativa	Spaceflight, uGravity, Radiation, Centrafuge, Light quality, Rice Cell Culture	Microgravity	Cosmic radiation	17 days		17 days	17 day old cell culture	SIMBOX flight vs GC	Shenzhou 8	Cell cultures	WT	WT	White light	12 h day/night cycle	Single time point	22-24	Microarray Transcription Profiling	Microarray	Affymetrix			Jin et al.,	2015
NA	Transcriptome Analysis of Oryza sativa Calli Under Microgravity	NA	Oryza sativa	Spaceflight, uGravity, Radiation, Rice Cell Culture	Microgravity with 1G centrafuge	Cosmic radiation	17 days		17 days	17 day old cell culture	SIMBOX flight vs centrafuge	Shenzhou 8	Cell cultures	WT	WT	White light	12 h day/night cycle	Single time point	22-24	Microarray Transcription Profiling	Microarray	Affymetrix			Jin et al.,	2015
NA	ROS transcriptional footprints in Arabidopsis	NA	Arabidopsis thaliana	ROS meta analysis variable	Terrestrial	Terrestrial	ROS meta analysis variable		ROS meta analysis variable	ROS meta contain various stages	ROS meta analysis variable	ROS meta analysis variable	ROS meta analysis variable	Col0, WS0, Ler	ROS meta analysis variable	ROS meta analysis variable	ROS meta analysis variable	ROS meta analysis variable	ROS meta analysis variable	Microarray Transcription Profiling	Microarray	Affymetrix			Willems et al.,	2017
NA	ATR and ATM play both distinct and additive roles in response to ionizing radiation	NA	Arabidopsis thaliana	Genotype, Radiation	Terrestrial	100Gy Ionizing Radiation	2 days large dose	100Gy Ionizing Radiation	5 days	5 day old seedlings	Lab: Petri dish	Brookhaven National Labs	Seedlings	WS0	WT	White light	24h white light	2 doses: Imbibed Seeds and 3 day old seedlings	26-28	Microarray Transcription Profiling	Microarray	Affymetrix			Culligan et al.,	2006
NA	ATR and ATM play both distinct and additive roles in response to ionizing radiation	NA	Arabidopsis thaliana	Genotype, Radiation	Terrestrial	100Gy Ionizing Radiation	2 days large dose	100Gy Ionizing Radiation	5 days	5 day old seedlings	Lab: Petri dish	Brookhaven National Labs	Seedlings	WS0	atr	White light	24h white light	2 doses: Imbibed Seeds and 3 day old seedlings	26-28	Microarray Transcription Profiling	Microarray	Affymetrix			Culligan et al.,	2006
NA	ATR and ATM play both distinct and additive roles in response to ionizing radiation	NA	Arabidopsis thaliana	Genotype, Radiation	Terrestrial	100Gy Ionizing Radiation	2 days large doses	100Gy Ionizing Radiation	5 days	5 day old seedlings	Lab: Petri dish	Brookhaven National Labs	Seedlings	WS0	atm	White light	24h white light	2 doses: Imbibed Seeds and 3 day old seedlings	26-28	Microarray Transcription Profiling	Microarray	Affymetrix			Culligan et al.,	2006
GLDS-144	Gravitational signature of synchronized cell cultures in particular cell cycle stages	https://genelab-data.ndc.nasa.gov/genelab/accession/GLDS-144/	Arabidopsis thaliana	Cell culture, cell cycle phases, uGravity	Simulated microgravity	Terrestrial	up to 16 hours		6 days	6 day old seedlings	Lab: Petri dish	RPM	Cell cultures	MM2D	WT	Dark	Dark	Cell cycle phases (G2, G1, S)	26-28	Microarray Transcription Profiling	Microarray	CATMA v6.2 (TAIR v8)			Kamal et al.,	2019
GLDS-22	Root transcriptome remodeling of Arabidopsis in response to high levels of magnesium sulfate	https://genelab-data.ndc.nasa.gov/genelab/accession/GLDS-22	Arabidopsis thaliana	Genotype, ionic stress, Mg2+ stress	Terrestrial	Terrestrial	45, 90 and 180 hours		3 weeks	3 week hydroponic plant root samples	Hydroponics	Magnesium sulfate	Roots	Col0	WT & cax1-1	White light	24h white light	45, 90 and 180 hours	22-24	Microarray Transcription Profiling	Microarray	Agilent			Visscher et al.,	2010
GLDS-205	HSFA2 functions in the physiological adaptation of undifferentiated plant cells to spaceflight microgravity environment	https://genelab-data.ndc.nasa.gov/genelab/accession/GLDS-205	Arabidopsis thaliana	Spaceflight, uGravity, Radiation, Genotype	Microgravity	Cosmic radiation	12 days	Unknown Radiation on ISS	14 days	14 day old cell culture	BRIC	ISS	Cell cultures	Col0	hsfA2	Dark	Dark	Single time point	22-24	Microarray Transcription Profiling	Microarray	Affymetrix			Zupanska et al.,	2019
GLDS-251	New explorations into the interaction between light and gravity sensing in plants	https://www.nasa.gov/mission_pages/station/research/experiments/explorer/Investigation.html?#id=742	Arabidopsis thaliana	Spaceflight with gravity, Radiation, Genotype	Microgravity 1G with transition to Microgravity	Cosmic radiation during centrifugation	6 days	Unknown Radiation on ISS	6 days	Radical, hypocotyl and cotyledons emerged from seed coat, 6 day old light grown seedlings	EMCS	ISS	Seedlings	Ler0	WT	Light	4 hours darkness followed by blue phototropic stimuli	Single time point	22-24	RNAseq Transcription Profiling	RNAseq	Illumina			Vandenbrink et al.,	2019
NA	Changes in Gene Expression of Arabidopsis ThalianaCell Cultures Upon Exposure to Real and Simulated Partial-g Forces	NA	Arabidopsis thaliana	Hyper and microgravity transitions	2G HyperGravity and uG for 27-32s	Terrestrial, high altitude	Minutes		10 day old	10 day old rosette leaves	KC-135A: Petri dish	KC-135A	Leaves	WS0	WT	Light	16/8 h photoperiod	20 and 40 parabolic transitions	22-24	Microarray Transcription Profiling	Microarray	Affymetrix - GeneChip			Paul et al.,	2011
NA	Analysis of gene expression during parabolic flights reveals distinct early gravity responses in Arabidopsis roots	NA	Arabidopsis thaliana	Hyper and microgravity transitions with ground hypergravity controls	2G HyperGravity and uG for 20-22s	Terrestrial, high altitude	Minutes	1.8 HyperGravity for 20s, uG for 22s & Control sanple centrafuge mimics hypergravity transitions	5 day old	5 day old rosette leaves	Airbus A300 Zero�ېG: Petri dish	Airbus A300 Zero�ېG	Root tip	Col0	pin2, pin3	Light	16/8 h photoperiod	15 or 30 Parabolic transitions	22-24	Microarray Transcription Profiling	Microarray	Agilent			Aubry�ېHivet et al.,	2013
GLDS-217	Spaceflight-induced alternative splicing during seedling development in Arabidopsis thaliana.	NA	Arabidopsis thaliana	Spaceflight, uGravity, Radiation, Ecotype	Microgravity	Cosmic radiation	4 and 8 days	Alternative splicing	4 and 8 days	4 and 8 day old seedlings	VEGGIE: Petri dish	ISS	Seedlings	WS0	WT	Light	24hr 100-135 �moles/m2/s PAR	4 and 8 days	22-24	RNAseq Transcription Profiling	RNAseq	Illumina HiSeq3000			Beisel et al.,	2019
GLDS-217	Spaceflight-induced alternative splicing during seedling development in Arabidopsis thaliana.	NA	Arabidopsis thaliana	Spaceflight, uGravity, Radiation, Ecotype	Microgravity	Cosmic radiation	4 and 8 days	Alternative splicing	4 and 8 days	4 and 8 day old seedlings	VEGGIE: Petri dish	ISS	Seedlings	Col0	WT	Light	24hr 100-135 �moles/m2/s PAR	4 and 8 days	22-24	RNAseq Transcription Profiling	RNAseq	Illumina HiSeq3000			Beisel et al.,	2019
GLDS-218	Epigenomics in an extraterrestrial environment: organ-specific alteration of DNA methylation and gene expression elicited by spaceflight in Arabidopsis thaliana	NA	Arabidopsis thaliana	Spaceflight, uGravity, Radiation, Ecotype	Microgravity	Cosmic radiation	11 days	Epigenetics	11 days	11 day old seedling roots	VEGGIE: Petri dish	ISS	Roots and shoots	WS0	WT	Light	24hr 100-135 �moles/m2/s PAR	Single time point	22-24	RNAseq Transcription Profiling & methylation profiling	RNAseq	Illumina HiSeq3000	Methylation profiling	Bisulfite DNA sequencing	Zhou et al.,	2019
GLDS-218	Epigenomics in an extraterrestrial environment: organ-specific alteration of DNA methylation and gene expression elicited by spaceflight in Arabidopsis thaliana	NA	Arabidopsis thaliana	Spaceflight, uGravity, Radiation, Ecotype	Microgravity	Cosmic radiation	11 days	Epigenetics	11 days	11 day old seedling shoots	VEGGIE: Petri dish	ISS	Roots and shoots	Col0	WT	Light	24hr 100-135 �moles/m2/s PAR	Single time point	22-24	RNAseq Transcription Profiling & methylation profiling	RNAseq	Illumina HiSeq3000	Methylation profiling	Bisulfite DNA sequencing	Zhou et al.,	2019
GLDS-210	Approaches for Surveying Cosmic Radiation Damage in Large Populations of Arabidopsis thaliana Seeds- an Antarctic Example	https://genelab-data.ndc.nasa.gov/genelab/accession/GLDS-210/	Arabidopsis thaliana	High altitude flight, radiation	Terrestrial	High altitude radiation	NA	Epigenetics	NA	NA	Petri dish	High altitude balloon & Brookhaven particle accerlator	Seeds	Col0	WT	Dark	Dark	Single time point	17-21	PacBio DNA sequence analysis	DNA sequencing	PacBio			Califar et al.,	2018
NA	Gene expression changes induced by space flight in single-cells of the fern Ceratopteris richardii	NA	Ceratopteris richardii	Spaceflight, uGravity, Radiation	Microgravity	Cosmic radiation	24hours		24hours	Spores	BRIC	ISS	Spore culture	Fern	WT	Dark	Dark	Single time point	22-24	Microarray Transcription Profiling	Microarray	Custom Microarray			Salmi et al.,	2008
