# Supplementary material for: Test of Arabidopsis Space Transcriptome: A Discovery Environment to Explore Multiple Plant Biology Spaceflight Experiments
Source: Front Plant Sci. 2020 Mar 4;11:147. doi: 10.3389/fpls.2020.00147 (PMC7076552; doi:10.3389/fpls.2020.00147)
Supplement: Supplementary file 3 [file DataSheet_3.xlsx]

## Sheet: Comparison flight vs ground
Supplementary Table 5.1
Significantly differentially expressed genes (p<0.05) in flight samples vs ground control of Arabidopsis in cell cultures grown on the Shnezhou 8 mission. Predicted Rice orthologs are shown along with adjusted p-values corrected for multiple testing (Q-value) for both the Arabidopsis and rice genes. Note some Arabidopsis genes have multiple predicted ortohologs in rice.
Arabidopsis Gene Symbol	Arabidopsis Locus ID	Rice Ortholog Gene_id	% identity of rice ortholog to Arabidopsis gene	adj.P-Val for Arabidopsis data	adj.P.Val for Rice data
MIOX4	AT4G26260	OS06G0561000	69.8052	0.000109865	0.0973895
-	AT1G69890	OS07G0191600	36.409	0.000109865	0.0883294
-	AT1G69890	OS07G0191600	36.409	0.000109865	0.120999
glutaredoxin	AT1G03850	OS01G0667900	31.9728	0.000139	0.0281431
hydrolase	AT2G32150	OS03G0701200	46.0145	0.000139	0.04135
LTP	AT4G12470	OS10G0551700	42.5926	0.000139	0.0783729
CK	AT1G71697	OS01G0183000	57.7657	0.00016727	0.0293059
CK	AT1G71697	OS01G0183000	57.7657	0.00016727	0.070427
CK	AT1G71697	OS01G0717000	58.1522	0.00016727	0.0868599
CK	AT1G71697	OS01G0717000	58.1522	0.00016727	0.100545
BT2	AT3G48360	OS04G0482300	38.3099	0.000199237	0.104613
glucosyl transferase	AT3G11340	OS03G0824600	29.7741	0.000199237	0.0997977
glucosyl transferase	AT3G11340	OS11G0441500	37.1795	0.000199237	0.0645999
glucosyl transferase	AT3G11340	OS07G0241800	37.5546	0.000199237	0.0289144
glucosyl transferase	AT3G11340	OS07G0241800	37.5546	0.000199237	0.036019
glucosyl transferase	AT3G11340	OS07G0241500	38.0457	0.000199237	0.129458
glucosyl transferase	AT3G11340	OS07G0240600	38.3966	0.000199237	0.197781
kinase	AT1G80380	OS01G0682500	60.7655	0.000199237	0.0661596
XTR4	AT1G32170	OS02G0696500	53.8462	0.000199237	0.0832883
IVD	AT3G45300	OS05G0125500	82.1516	0.000217465	0.0656729
IVD	AT3G45300	OS05G0125500	82.1516	0.000217465	0.10752
YCF32	AT1G67740	OS08G0119800	49.2683	0.000226814	0.138403
GRAM	AT5G08350	OS04G0526800	40.7725	0.000234641	0.0414599
GRAM	AT5G08350	OS04G0527000	43.2558	0.000234641	0.0879015
LTP	AT4G12500	OS10G0551700	40.7407	0.000234641	0.0783729
UGE3	AT1G63180	OS09G0526700	62.7346	0.000241162	0.0837644
LHCB3*1	AT5G54270	OS07G0562700	81.5789	0.000273928	0.120397
PSII-Q	AT4G05180	OS07G0544800	57.6037	0.000286135	0.00676833
RMA1	AT4G03510	OS02G0639800	24.4755	0.000290434	0.0392277
RMA1	AT4G03510	OS02G0639800	24.4755	0.000290434	0.0457301
RMA1	AT4G03510	OS02G0639800	24.4755	0.000290434	0.0727704
RMA1	AT4G03510	OS02G0639800	24.4755	0.000290434	0.117653
RMA1	AT4G03510	OS02G0639800	24.4755	0.000290434	0.191765
RMA1	AT4G03510	OS04G0530500	26.087	0.000290434	0.0381678
kinase	AT1G16260	OS12G0615300	28.8204	0.00030487	0.0157896
kinase	AT1G16260	OS01G0364100	31.4483	0.00030487	0.132314
kinase	AT1G16260	OS09G0471400	41.3706	0.00030487	0.129218
BETAVPE	AT1G62710	OS04G0537900	63.3803	0.000307199	0.17293
APT2	AT1G80050	OS02G0613900	52.9412	0.000335945	0.150119
PIP2A	AT3G53420	OS07G0448200	66.787	0.000335945	0.113668
PIP2A	AT3G53420	OS04G0521100	79.6552	0.000335945	0.0232089
-	AT2G15695	OS11G0614900	47.6793	0.000335945	0.0974759
PGR1	AT4G03280	OS07G0556200	72.8889	0.000349903	0.18927
-	AT5G22270	OS01G0863500	26.3566	0.000401108	0.0212678
-	AT5G22270	OS02G0536500	27.6423	0.000401108	0.19461
-	AT5G22270	OS04G0415000	30.1724	0.000401108	0.14121
-	AT5G22270	OS04G0684600	34.5679	0.000401108	0.0200648
F-box	AT1G80440	OS06G0594400	37.0079	0.000432484	0.0311584
GRX480	AT1G28480	OS01G0667900	41.4966	0.000432484	0.0281431
PSBE	ATCG00580	OS03G0659233	97.5904	0.000432484	0.156549
SRG2	AT3G60140	OS04G0474500	43.3447	0.000432484	0.0539506
SRG2	AT3G60140	OS04G0474500	43.3447	0.000432484	0.156514
SRG2	AT3G60140	OS06G0320200	46.7532	0.000432484	0.110295
-	AT5G11420	OS03G0328501	33.119	0.000439244	0.154278
-	AT5G11420	OS04G0495000	53.6193	0.000439244	0.0736849
-	AT5G11420	OS04G0494950	57.5269	0.000439244	0.0653722
myb	AT5G61620	OS08G0151000	27.7286	0.000463733	0.00849475
COP1-interacting	AT5G43310	OS07G0445600	32.5553	0.000494995	0.0133518
SCRM	AT3G26744	OS01G0928000	48.0315	0.000539455	0.0384201
SCRM	AT3G26744	OS01G0928000	48.0315	0.000539455	0.204591
UGT73D1	AT3G53150	OS01G0176000	42.1687	0.000539455	0.0148832
geranylgeranyl reductase	AT1G74470	OS02G0744900	68.2505	0.000546532	0.0469366
pEARLI 1	AT4G12480	OS10G0551700	41.358	0.00054894	0.0783729
hydrolase	AT5G06570	OS01G0153800	38.1471	0.000593741	0.128858
LIV1	AT1G45145	OS07G0186000	54.0984	0.000593741	0.201622
PSAO	AT1G08380	OS04G0414700	64.7887	0.000593741	0.0345741
PSBW	AT2G30570	OS01G0773700	58.0645	0.000593741	0.0168591
-	AT3G15450	OS04G0679400	60.0775	0.000593741	0.0924898
-	AT1G77890	OS07G0626300	38.4259	0.000597038	0.0151984
AAA-type ATPase	AT3G28540	OS07G0192000	42.6357	0.000619621	0.0197908
ATP binding	AT1G55790	OS09G0479300	24.6809	0.000619621	0.135539
BCAT-2	AT1G10070	OS03G0231600	55.4217	0.000619621	0.0946257
glycine-rich	AT4G21620	OS12G0634700	38.4615	0.000619621	0.130893
glycine-rich	AT4G21620	OS03G0676300	45.7317	0.000619621	0.101164
GLP9	AT4G14630	OS08G0189200	55.5556	0.000636437	0.156308
-	AT2G20670	OS05G0519300	32.3529	0.000637869	0.186709
PRR5	AT5G24470	OS09G0532400	29.8555	0.000670304	0.0878562
ACO2	AT1G62380	OS02G0771600	59.8131	0.000701872	0.107755
ACO2	AT1G62380	OS09G0451400	63.6646	0.000701872	0.110765
ACO2	AT1G62380	OS09G0451000	63.9752	0.000701872	0.0197556
AZF2	AT3G19580	OS03G0437200	9.54545	0.000701872	0.167334
AZF2	AT3G19580	OS03G0610400	39.0756	0.000701872	0.155255
AZF2	AT3G19580	OS03G0610400	39.0756	0.000701872	0.155639
AZF2	AT3G19580	OS12G0583700	39.2713	0.000701872	0.0476591
ELI3-2	AT4G37990	OS03G0223200	51.8325	0.000701872	0.106708
LTA1	AT3G06850	OS01G0314100	55.4493	0.000701872	0.186395
PSBQA	AT4G21280	OS07G0544800	61.2903	0.000701872	0.00676833
PSBR	AT1G79040	OS07G0147500	56.9343	0.000703539	0.140837
BIP3	AT1G09080	OS05G0428600	66.8122	0.000721249	0.013632
GAPA-2	AT1G12900	OS04G0459500	84.8259	0.000723541	0.145251
hydrolase	AT5G59490	OS01G0973000	49.8221	0.000736193	0.0825378
hydrolase	AT5G59490	OS01G0973000	49.8221	0.000736193	0.102812
THIC	AT2G29630	OS03G0679700	80.9077	0.000740762	0.0329356
protease	AT3G54400	OS07G0658600	55.6793	0.000775459	0.159396
FAD-binding	AT1G30700	OS02G0235900	38.0952	0.000792466	0.0207655
FAD-binding	AT1G30700	OS06G0549300	40.5354	0.000792466	0.163094
FAD-binding	AT1G30700	OS06G0549300	40.5354	0.000792466	0.175322
FAD-binding	AT1G30700	OS06G0548800	40.678	0.000792466	0.165181
HSP26.5-P	AT4G21870	OS07G0517100	31.7919	0.000792466	0.0267447
hydrolase	AT1G43670	OS05G0438600	48.7805	0.000792466	0.088437
hydrolase	AT1G43670	OS01G0866400	70.7965	0.000792466	0.123004
PSBO1	AT5G66570	OS01G0501800	75.6757	0.000792466	0.198974
SKP2B	AT1G77000	OS05G0425700	60.1064	0.000792466	0.0303144
-	AT2G28690	OS05G0115100	27.037	0.000828765	0.0630676
-	AT2G28690	OS05G0115100	27.037	0.000828765	0.109896
BZO2H2	AT5G24800	OS06G0662200	29.4915	0.000832224	0.110584
BZO2H2	AT5G24800	OS02G0175100	31.4079	0.000832224	0.0454855
BZO2H2	AT5G24800	OS02G0266800	32.2148	0.000832224	0.111833
-	AT4G01026	OS06G0526466	27.5362	0.000852386	0.0959948
glyoxalase I	AT1G15380	OS01G0173600	41.8605	0.000857467	0.151627
glyoxalase I	AT1G15380	OS05G0171900	47.5962	0.000857467	0.061581
PETE2	AT1G20340	OS06G0101600	60.3896	0.000857467	0.0847933
cupin	AT2G28680	OS05G0116000	69.9164	0.000887712	0.0321856
CXXS1	AT1G11530	OS04G0629500	45.8647	0.000892482	0.13804
PGIP1	AT5G06860	OS09G0491612	35.9649	0.000892482	0.165957
PGIP1	AT5G06860	OS05G0104700	36.409	0.000892482	0.042083
PGIP1	AT5G06860	OS05G0104700	36.409	0.000892482	0.042962
SS3	AT1G74000	OS08G0175000	31.7416	0.000892482	0.159173
stress-responsive	AT4G37220	OS03G0767800	53.3333	0.000892482	0.0770115
STP1	AT1G11260	OS01G0567500	64.3275	0.000933585	0.12319
STP1	AT1G11260	OS01G0567500	64.3275	0.000933585	0.177027
STP1	AT1G11260	OS07G0106200	67.1815	0.000933585	0.116564
sugar transporter	AT5G18840	OS03G0363500	48.03	0.000934301	0.115092
sugar transporter	AT5G18840	OS03G0363600	53.0097	0.000934301	0.0548755
ho3	AT1G69720	OS06G0603000	53.6332	0.000954203	0.174665
LHCB5	AT4G10340	OS11G0242800	78.0919	0.000973305	0.0583676
glyoxalase I	AT1G80160	OS01G0173600	43.2558	0.000996001	0.151627
glyoxalase I	AT1G80160	OS05G0171900	48.0769	0.000996001	0.061581
ALDH2B7	AT1G23800	OS02G0730000	71.0669	0.00101586	0.124203
ALDH2B7	AT1G23800	OS02G0730000	71.0669	0.00101586	0.128184
AP2	AT3G60490	OS04G0549700	32.7465	0.00101586	0.0932765
AP2	AT3G60490	OS04G0550200	45.1613	0.00101586	0.0799263
zinc finger	AT5G27420	OS02G0572300	18.4211	0.00101586	0.091012
zinc finger	AT5G27420	OS02G0759400	24.4851	0.00101586	0.00728538
zinc finger	AT5G27420	OS06G0218300	26.0181	0.00101586	0.0295015
zinc finger	AT5G27420	OS03G0188200	27.1955	0.00101586	0.0315536
zinc finger	AT5G27420	OS02G0572200	27.5072	0.00101586	0.151848
zinc finger	AT5G27420	OS04G0450300	29.4985	0.00101586	0.0514263
SLP2	AT4G34980	OS03G0242900	62.9487	0.00101762	0.145446
-	AT5G61820	OS08G0538600	51.4151	0.00101762	0.00612841
kinase	AT2G36350	OS12G0480200	65.5814	0.00104694	0.0708391
ATPC1	AT4G04640	OS07G0513000	71.7877	0.00107689	0.041337
nuM1	AT1G72800	OS04G0620700	10.4668	0.00107689	0.171261
-	AT4G32870	OS01G0198900	23.6111	0.00111881	0.00571908
-	AT4G32870	OS01G0198900	23.6111	0.00111881	0.00742267
-	AT4G32870	OS01G0724700	27.4775	0.00111881	0.167706
PDCB2	AT5G08000	OS03G0756300	41.7143	0.00113168	0.0540545
MCCA	AT1G03090	OS12G0605800	62.0081	0.00116396	0.149824
PSBX	AT2G06520	OS07G0673550	41.8803	0.00117985	0.0183562
PSBX	AT2G06520	OS07G0673550	41.8803	0.00117985	0.0262235
NSP5	AT5G48180	OS09G0249000	49.3976	0.00119045	0.0118281
hydrolase	AT2G05790	OS07G0539300	37.0884	0.00122584	0.0441375
kinase	AT5G16900	OS09G0356800	34.3091	0.00123166	0.13204
kinase	AT5G16900	OS09G0355400	35.3273	0.00123166	0.157254
GUN5	AT5G13630	OS07G0656500	81.9364	0.00123937	0.0958913
GUN5	AT5G13630	OS03G0323200	85.8407	0.00123937	0.0958913
AO	AT5G14760	OS02G0134400	67.5969	0.00129912	0.137473
NPR3	AT5G45110	OS03G0667100	43.9728	0.00129912	0.100986
NPR3	AT5G45110	OS01G0767900	46.2992	0.00129912	0.0645766
EST3	AT2G47800	OS04G0209200	59.0767	0.00130983	0.0637576
glycolipid binding	AT4G39670	OS03G0710700	54.7414	0.00130983	0.0387141
ethylene-responsive element-binding	AT1G72360	OS07G0674800	31.9249	0.0013914	0.204423
-	AT3G61870	OS02G0122500	60.5735	0.0013914	0.0149563
U-box	AT3G61390	OS10G0552400	27.8422	0.00139774	0.137395
U-box	AT3G61390	OS10G0548850	27.9012	0.00139774	0.00848062
-	AT5G25460	OS03G0328501	31.8328	0.00144814	0.154278
-	AT5G25460	OS04G0495000	52.5469	0.00144814	0.0736849
-	AT5G25460	OS04G0494950	55.914	0.00144814	0.0653722
CYP81D8	AT4G37370	OS03G0760200	41.3255	0.00145836	0.0407963
CYP81D8	AT4G37370	OS02G0503850	44.0476	0.00145836	0.162151
kinase	AT1G70740	OS09G0408900	34.3478	0.00147173	0.0424468
kinase	AT1G70740	OS09G0408900	34.3478	0.00147173	0.203752
PSAF	AT1G31330	OS03G0778100	63.1356	0.00149419	0.0545147
MARD1	AT3G63210	OS03G0665200	26.4901	0.00150548	0.0537583
hydrolase	AT3G47040	OS05G0449600	62.5786	0.0015205	0.174438
kinase	AT1G20650	OS03G0130900	52.7559	0.00152379	0.0511639
NHL3	AT5G06320	OS01G0864300	26.1411	0.00153351	0.0403984
NHL3	AT5G06320	OS12G0159000	28.125	0.00153351	0.0760275
NHL3	AT5G06320	OS04G0685300	32.6829	0.00153351	0.185417
kinase	AT1G51890	OS09G0356800	33.6066	0.00153783	0.13204
kinase	AT1G51890	OS09G0355400	37.8104	0.00153783	0.157254
ATRR4	AT3G57040	OS01G0952500	53.4483	0.00158667	0.180352
GSTU11	AT1G69930	OS10G0481300	44.6078	0.00168051	0.12724
FAD-binding	AT4G20830	OS02G0235900	38.0952	0.0016951	0.0207655
FAD-binding	AT4G20830	OS06G0548800	39.7363	0.0016951	0.165181
FAD-binding	AT4G20830	OS06G0549300	40.5354	0.0016951	0.163094
FAD-binding	AT4G20830	OS06G0549300	40.5354	0.0016951	0.175322
ENH1	AT5G17170	OS08G0162600	64.2308	0.00176304	0.144304
auxin-responsive	AT2G45210	OS02G0643800	32.1053	0.00177172	0.0571491
bHLH	AT2G24260	OS02G0795800	37.5	0.00180356	0.200016
glycerol 3-phosphate permease	AT3G47420	OS04G0555300	63.7899	0.00180356	0.0301183
glycerol 3-phosphate permease	AT3G47420	OS08G0156600	64.1283	0.00180356	0.00779844
GLR2.5	AT5G11210	OS06G0190800	37.0732	0.00184421	0.0937176
-	AT1G19835	OS10G0162400	39.2699	0.00184905	0.0424468
-	AT5G56980	OS05G0540900	19.6809	0.00184905	0.00777939
-	AT5G56980	OS06G0566500	24.1706	0.00184905	0.12659
MATE efflux	AT1G71140	OS05G0554000	51.7157	0.00186488	0.0125922
-	AT5G10695	OS08G0230600	30.8642	0.00186848	0.0265616
G4	AT3G51820	OS05G0349700	77.1277	0.00190874	0.171237
CYP709B3	AT4G27710	OS03G0371400	39.7959	0.00193396	0.188537
CYP709B3	AT4G27710	OS03G0371000	45.2514	0.00193396	0.0200313
CYP709B3	AT4G27710	OS03G0371000	45.2514	0.00193396	0.150983
CYP709B3	AT4G27710	OS07G0418500	45.6647	0.00193396	0.0244415
CYP709B3	AT4G27710	OS07G0635300	46.0285	0.00193396	0.203314
integral membrane	AT5G54980	OS02G0219900	28.3582	0.00195118	0.111513
secretory	AT2G15220	OS10G0490900	47.1861	0.00195118	0.135104
ZAT12	AT5G59820	OS01G0839100	28.655	0.00195118	0.0353662
ZAT12	AT5G59820	OS03G0820300	28.8235	0.00195118	0.0328222
ZAT12	AT5G59820	OS01G0838600	29.4931	0.00195118	0.162263
ZAT12	AT5G59820	OS05G0461200	29.6117	0.00195118	0.0797196
ZAT12	AT5G59820	OS03G0820400	29.8611	0.00195118	0.0158109
PP2-A13	AT3G61060	OS02G0224900	35.443	0.00196214	0.012351
PP2-A13	AT3G61060	OS02G0224900	35.443	0.00196214	0.0897906
PP2-A13	AT3G61060	OS10G0522400	46.6667	0.00196214	0.0310732
PP2-A13	AT3G61060	OS04G0571300	53.9474	0.00196214	0.0514653
PP2-A13	AT3G61060	OS04G0571300	53.9474	0.00196214	0.173968
PP2-A13	AT3G61060	OS03G0116700	54.8822	0.00196214	0.082566
-	AT2G28400	OS02G0629000	31.1765	0.00196214	0.0290017
protease	AT5G04250	OS02G0819500	43.3333	0.00197601	0.0623366
AOX1D	AT1G32350	OS02G0318100	49.8584	0.00201002	0.203083
AGL13	AT3G61120	OS04G0580700	48.8189	0.00202094	0.0361463
AGL13	AT3G61120	OS02G0682200	50.8	0.00202094	0.118729
-	AT2G32160	OS05G0511300	51.6194	0.00204049	0.100903
CEJ1	AT3G50260	OS06G0166400	40.2174	0.00205054	0.0231435
CEJ1	AT3G50260	OS06G0166400	40.2174	0.00205054	0.0356956
zinc finger	AT3G13430	OS03G0812200	35.5014	0.0021271	0.140837
zinc finger	AT3G13430	OS05G0488800	35.9133	0.0021271	0.16467
MIPS2	AT2G22240	OS10G0369900	82.9077	0.00213347	0.150219
nodulin MtN3	AT5G40260	OS01G0605700	43.7008	0.00217022	0.198093
scarecrow TF	AT5G66770	OS03G0723000	47.7509	0.00220666	0.0476646
starch synthase	AT1G32900	OS07G0412100	63.9803	0.00222695	0.049397
zinc finger	AT2G28510	OS02G0707200	21.5278	0.00222695	0.0488921
ZIF1	AT5G13740	OS11G0136400	44.2308	0.00223011	0.168614
ZIF1	AT5G13740	OS01G0279400	49.0946	0.00223011	0.188369
ZIF1	AT5G13740	OS12G0133100	52.5896	0.00223011	0.0632234
ZIF1	AT5G13740	OS11G0135000	54.8936	0.00223011	0.0606632
zinc finger	AT3G46070	OS01G0839100	27.4854	0.00224875	0.0353662
zinc finger	AT3G46070	OS03G0820300	27.6471	0.00224875	0.0328222
zinc finger	AT3G46070	OS01G0838600	29.0323	0.00224875	0.162263
zinc finger	AT3G46070	OS05G0461200	29.1262	0.00224875	0.0797196
zinc finger	AT3G46070	OS03G0820400	29.8611	0.00224875	0.0158109
-	AT3G25400	OS02G0479300	42.6667	0.00224971	0.128661
SNP33	AT5G61210	OS03G0212400	54.5082	0.00224977	0.11548
SNP33	AT5G61210	OS03G0212400	54.5082	0.00224977	0.161635
TIM17-3	AT5G11690	OS03G0415500	33.1731	0.00226635	0.112067
TIM17-3	AT5G11690	OS07G0604500	33.1839	0.00226635	0.0788358
TIM17-3	AT5G11690	OS07G0604550	35.6322	0.00226635	0.108343
MPK11	AT1G01560	OS08G0157000	75.1269	0.00229423	0.145733
GAPA-1	AT3G26650	OS04G0459500	84.5771	0.00232018	0.145251
FDH	AT5G14780	OS06G0486900	76.1905	0.00232419	0.154396
FDH	AT5G14780	OS06G0486800	79.7872	0.00232419	0.114266
YLS4	AT5G11520	OS01G0760600	75.4348	0.00233287	0.101697
YLS4	AT5G11520	OS01G0760600	75.4348	0.00233287	0.115146
ZAT10	AT1G27730	OS03G0437200	10.4545	0.00236135	0.167334
ZAT10	AT1G27730	OS12G0583700	35.6275	0.00236135	0.0476591
ZAT10	AT1G27730	OS03G0610400	36.1345	0.00236135	0.155255
ZAT10	AT1G27730	OS03G0610400	36.1345	0.00236135	0.155639
AER	AT5G16970	OS12G0225900	58.2609	0.00239131	0.088397
oxidoreductase	AT3G44190	OS02G0150300	60.1824	0.00243821	0.0592767
ATH13	AT5G64940	OS02G0575500	73.9187	0.00246412	0.00848886
UPS2	AT2G03530	OS12G0502800	67.1982	0.00246412	0.0806028
embryo-abundant	AT4G22530	OS01G0716500	45.2471	0.0025002	0.0102231
embryo-abundant	AT4G22530	OS01G0716500	45.2471	0.0025002	0.0118977
ATP binding	AT1G73170	OS06G0155600	55.9876	0.00250241	0.122384
OXI1	AT3G25250	OS04G0488700	44.3723	0.00254593	0.0585423
MRP10	AT3G62700	OS04G0209200	59.1549	0.00255727	0.0637576
CBS	AT4G27460	OS04G0679600	23.0198	0.00255845	0.0909631
thioredoxin	AT1G07700	OS02G0567100	48.5981	0.00256504	0.116307
AHK2	AT5G35750	OS10G0362300	46.7105	0.00256862	0.166057
IAA2	AT3G23030	OS03G0797800	36.0406	0.00262403	0.057119
IAA2	AT3G23030	OS03G0633800	36.2832	0.00262403	0.0539506
ribosome	AT1G68590	OS04G0461100	38.7978	0.00267366	0.0110868
HSFB2A	AT5G62020	OS09G0526600	29.2952	0.00267699	0.112598
HSFB2A	AT5G62020	OS09G0526600	29.2952	0.00267699	0.139229
SDR	AT2G37540	OS01G0151700	63.5514	0.00276227	0.0799926
IBR5	AT2G04550	OS06G0308100	56.6308	0.00278031	0.0152323
PIP1A	AT3G61430	OS02G0823100	82.9861	0.0028017	0.0151913
PIP1A	AT3G61430	OS04G0559700	87.5	0.0028017	0.121164
MRH1	AT4G18640	OS01G0206800	44.6559	0.00281155	0.0549263
MRH1	AT4G18640	OS01G0674800	53.7838	0.00281155	0.0301833
kinase	AT1G80640	OS08G0285600	41.9525	0.00281376	0.0157896
kinase	AT1G80640	OS05G0319700	46.4435	0.00281376	0.0576866
armadillo/beta-catenin repeat	AT4G31890	OS09G0416900	50.6148	0.00286303	0.134505
tic20-IV	AT4G03320	OS02G0614400	29.572	0.00286303	0.0586472
tic20-IV	AT4G03320	OS07G0568500	29.7794	0.00286303	0.0731428
-	AT2G36835	OS01G0776700	40	0.00286303	0.0158825
-	AT2G36835	OS01G0776700	40	0.00286303	0.0399974
MATE efflux	AT5G52450	OS06G0707100	52.381	0.00290729	0.194507
AGT1	AT2G13360	OS08G0502700	84.0796	0.0029292	0.190835
-	AT4G27900	OS05G0595300	37.6623	0.00295426	0.0129125
-	AT4G27900	OS05G0595300	37.6623	0.00295426	0.0266064
-	AT4G27900	OS05G0595300	37.6623	0.00295426	0.0376945
BGAL4	AT5G56870	OS02G0219200	61	0.00296236	0.127096
BGAL4	AT5G56870	OS06G0573600	65.1748	0.00296236	0.16274
RNS1	AT2G02990	OS08G0434100	53.7118	0.00297369	0.0093055
lipase	AT5G22460	OS01G0859200	45.245	0.00302637	0.205396
PMZ	AT3G28210	OS09G0385700	43.617	0.00304368	0.0261383
-	AT3G60520	OS04G0551600	34.6774	0.00312099	0.122722
-	AT4G01150	OS08G0430600	49.0566	0.00312685	0.0817405
-	AT4G01150	OS08G0430600	49.0566	0.00312685	0.117653
FL5-2I22	AT5G62350	OS04G0106000	32.2034	0.00315292	0.0349173
FL5-2I22	AT5G62350	OS06G0711800	36.5	0.00315292	0.0427063
-	AT1G76600	OS09G0493000	4.97512	0.00330409	0.15796
-	AT1G76600	OS02G0193300	28.6458	0.00330409	0.111263
-	AT1G76600	OS02G0193300	28.6458	0.00330409	0.19901
-	AT1G76600	OS09G0492900	28.9617	0.00330409	0.11259
DNAJ	AT2G21510	OS05G0543700	64.497	0.00332555	0.0438064
DNAJ	AT2G21510	OS05G0543700	64.497	0.00332555	0.105239
PAP1	AT2G01180	OS01G0139600	52.0767	0.00339193	0.20558
subtilase	AT4G20430	OS01G0769200	61.3663	0.00339193	0.168089
transferase	AT5G07860	OS11G0244100	37.6569	0.00339193	0.130987
transferase	AT5G07860	OS11G0244100	37.6569	0.00339193	0.131674
transferase	AT5G07860	OS06G0103200	38.1779	0.00339193	0.103085
FAD-binding	AT1G26420	OS02G0235900	36.8607	0.00343487	0.0207655
FAD-binding	AT1G26420	OS06G0548800	40.113	0.00343487	0.165181
FAD-binding	AT1G26420	OS06G0549300	40.153	0.00343487	0.163094
FAD-binding	AT1G26420	OS06G0549300	40.153	0.00343487	0.175322
MGDC	AT2G11810	OS02G0802700	59.1133	0.00348021	0.059532
MGDC	AT2G11810	OS08G0299400	70.098	0.00348021	0.00757156
NHL repeat	AT1G70280	OS06G0269300	51.4507	0.00364926	0.156452
NHL repeat	AT1G70280	OS02G0730400	55.1181	0.00364926	0.169463
MCCB	AT4G34030	OS08G0424200	75.8064	0.00365986	0.0914881
MES11	AT3G29770	OS07G0603600	67.0251	0.00365986	0.0121657
SRK2H	AT5G63650	OS05G0433100	53.6585	0.00367664	0.149245
SRK2H	AT5G63650	OS01G0869900	67.9612	0.00367664	0.0329356
SRK2H	AT5G63650	OS02G0551100	73.9726	0.00367664	0.0384864
SRK2H	AT5G63650	OS04G0432000	77.4373	0.00367664	0.0207655
zinc finger	AT5G55970	OS01G0703300	55.9211	0.00371664	0.0943861
CYP72A15	AT3G14690	OS01G0627500	9.56023	0.00375379	0.00191364
CYP72A15	AT3G14690	OS01G0627600	44.5783	0.00375379	0.005295
CYP72A15	AT3G14690	OS01G0627400	46.9314	0.00375379	0.202291
CYP72A15	AT3G14690	OS01G0628700	49.7175	0.00375379	0.105163
CYP72A15	AT3G14690	OS01G0627800	50	0.00375379	0.00720461
CYP72A15	AT3G14690	OS05G0372300	50.4817	0.00375379	0.0294148
CYP72A15	AT3G14690	OS01G0728300	50.8671	0.00375379	0.083566
-	AT5G46230	OS06G0538900	32.1053	0.00380022	0.00791493
UGP3	AT3G56040	OS05G0468600	49.7812	0.00383042	0.202218
transferase/ transferase, transferring acyl groups other than amino-acyl groups	AT5G39050	OS06G0145300	20.4013	0.00383087	0.12659
transferase/ transferase, transferring acyl groups other than amino-acyl groups	AT5G39050	OS02G0485800	26.3566	0.00383087	0.127346
transferase/ transferase, transferring acyl groups other than amino-acyl groups	AT5G39050	OS02G0820400	31.5673	0.00383087	0.0419668
PGIP2	AT5G06870	OS09G0491612	35.0877	0.00386594	0.165957
PGIP2	AT5G06870	OS05G0104700	35.9102	0.00386594	0.042083
PGIP2	AT5G06870	OS05G0104700	35.9102	0.00386594	0.042962
heavy-metal-associated	AT5G19090	OS11G0147500	44.0777	0.00391448	0.153596
dehydration-responsive	AT1G19430	OS03G0775200	46.0905	0.00397126	0.0673181
-	AT5G06700	OS06G0207500	35.6944	0.00408493	0.192435
kinase	AT1G68690	OS01G0738300	47.69	0.00419268	0.0287949
kinase	AT1G68690	OS01G0110500	47.851	0.00419268	0.0908043
kinase	AT1G68690	OS05G0100700	68.8213	0.00419268	0.147814
kinase	AT1G68690	OS05G0100700	68.8213	0.00419268	0.190236
oxidoreductase	AT3G19000	OS03G0618300	53.125	0.00419268	0.12153
USP	AT2G47710	OS12G0552400	58.125	0.00419268	0.0612653
zinc ion binding	AT1G02750	OS05G0358000	24.4635	0.00425446	0.204657
zinc ion binding	AT1G02750	OS12G0556100	26.1468	0.00425446	0.0327347
-	AT1G23710	OS05G0578100	21.5686	0.00427635	0.134194
-	AT1G23710	OS05G0568600	25.1082	0.00427635	0.171275
-	AT1G23710	OS01G0639600	27.4194	0.00427635	0.0619072
-	AT1G60010	OS08G0420700	33.8624	0.00427635	0.005295
hydrolase	AT3G47050	OS05G0449600	63.8365	0.00434258	0.174438
YCF37	AT2G23670	OS02G0815300	30.9783	0.00434258	0.0201016
ATP synthase	AT4G32260	OS03G0278900	54.5024	0.00436049	0.11953
ELF4-L2	AT1G72630	OS11G0621500	65.812	0.00436149	0.112161
MPK7	AT2G18170	OS02G0148100	81.3513	0.00441585	0.0210404
AAP3	AT1G77380	OS04G0490900	51.3158	0.00442235	0.164875
AAP3	AT1G77380	OS12G0181600	67.5789	0.00442235	0.0578933
anac028	AT1G65910	OS03G0119966	38	0.00443745	0.0698543
XLG1	AT2G23460	OS12G0593000	55.8309	0.00443745	0.156549
kinase	AT1G69790	OS10G0405100	59.3458	0.00444025	0.0283178
kinase	AT1G69790	OS10G0405100	59.3458	0.00444025	0.0886171
CYP76C2	AT2G45570	OS09G0447300	27.6471	0.00445641	0.0158825
CYP76C2	AT2G45570	OS02G0571900	38.4766	0.00445641	0.0322448
CYP76C2	AT2G45570	OS06G0501900	39.2079	0.00445641	0.100575
CYP76C2	AT2G45570	OS02G0569000	41.3174	0.00445641	0.132166
pectinesterase	AT3G49220	OS02G0288100	49.8195	0.0044737	0.11895
WRKY31	AT4G22070	OS01G0246700	29.7821	0.0044737	0.0330958
WRKY31	AT4G22070	OS01G0246700	29.7821	0.0044737	0.04135
TMP-C	AT4G00430	OS02G0823100	82.9861	0.00449785	0.0151913
TMP-C	AT4G00430	OS04G0559700	87.8472	0.00449785	0.121164
zinc finger	AT1G08050	OS10G0464500	24.2798	0.00449785	0.0701409
zinc finger	AT1G08050	OS03G0142500	41.6427	0.00449785	0.0843786
zinc finger	AT1G08050	OS04G0508800	42.0904	0.00449785	0.133566
calmodulin binding	AT1G73805	OS09G0309200	32.1101	0.00452998	0.156845
ACHT4	AT1G08570	OS03G0326500	54.5455	0.00454182	0.0317432
-	AT4G18920	OS01G0749000	51.1905	0.00466769	0.205959
-	AT4G18920	OS01G0728700	52.8	0.00466769	0.102234
TMT2	AT4G35300	OS11G0475600	60.502	0.00470114	0.123659
TMT2	AT4G35300	OS02G0229400	71.0456	0.00470114	0.00849475
TMT2	AT4G35300	OS10G0539900	71.6216	0.00470114	0.00939958
TMT2	AT4G35300	OS10G0539900	71.6216	0.00470114	0.0406179
TMT2	AT4G35300	OS10G0539900	71.6216	0.00470114	0.102243
kinase	AT3G17770	OS03G0719300	74.7475	0.00470719	0.0263203
scpl50	AT1G15000	OS01G0629600	43.3628	0.00473104	0.038179
tyrosine specific phosphatase	AT5G16480	OS12G0420300	46.5909	0.00491576	0.060278
CLC	AT5G33280	OS08G0300300	62.5628	0.00503778	0.0817019
-	AT1G63420	OS04G0534100	43.6073	0.00503778	0.109539
-	AT1G63420	OS04G0534100	43.6073	0.00503778	0.131758
PUB23	AT2G35930	OS02G0539200	43.4389	0.00512824	0.107436
PUB23	AT2G35930	OS01G0865700	44.226	0.00512824	0.0559971
subtilase	AT3G14240	OS08G0452100	56.3555	0.00515021	0.0937286
PETE1	AT1G76100	OS06G0101600	60.3896	0.00515798	0.0847933
DND1	AT5G15410	OS03G0758300	71.1974	0.00524051	0.132419
ERF8	AT1G53170	OS04G0610400	37.3874	0.00526649	0.0316676
TF	AT5G07580	OS04G0547600	19.2073	0.00526649	0.0157896
phosphatase	AT1G17710	OS01G0600500	46.8421	0.00528288	0.140422
phosphatase	AT1G17710	OS01G0720400	52.1898	0.00528288	0.005295
-	AT1G52220	OS01G0761000	36.4238	0.00528562	0.0797273
chloroplast thylakoid lumen	AT4G02530	OS06G0705100	39.749	0.00531643	0.0670044
ACR3	AT1G76990	OS02G0555600	56.9647	0.00542137	0.0111164
ACR3	AT1G76990	OS02G0555600	56.9647	0.00542137	0.0396021
ACR3	AT1G76990	OS02G0555600	56.9647	0.00542137	0.0518078
GGH3	AT1G78670	OS05G0517500	51.3353	0.00542941	0.132584
CYP89A9	AT3G03470	OS10G0514700	38.8626	0.00546055	0.14859
CYP89A9	AT3G03470	OS10G0513400	41.0882	0.00546055	0.0536228
CYP89A9	AT3G03470	OS10G0514901	41.2109	0.00546055	0.14859
-	AT3G51720	OS03G0339700	28.8603	0.00546055	0.16167
-	AT3G51720	OS07G0677900	28.9017	0.00546055	0.0496103
trihelix DNA-binding	AT5G28300	OS02G0104500	22.0833	0.00546305	0.137986
kinase	AT1G51830	OS09G0355400	28.781	0.00547712	0.157254
kinase	AT1G51830	OS09G0356800	29.3911	0.00547712	0.13204
rhodanese-like	AT4G27700	OS09G0530000	62.0087	0.00547893	0.0538474
ATRP1	AT4G21210	OS07G0530600	46.9214	0.00548455	0.0581091
DIN10	AT5G20250	OS06G0172800	52.4324	0.00548455	0.0367056
zinc finger	AT3G53600	OS01G0839100	26.9006	0.00549779	0.0353662
zinc finger	AT3G53600	OS03G0820300	27.6471	0.00549779	0.0328222
zinc finger	AT3G53600	OS05G0461200	27.6699	0.00549779	0.0797196
zinc finger	AT3G53600	OS01G0838600	28.1106	0.00549779	0.162263
zinc finger	AT3G53600	OS03G0820400	31.9444	0.00549779	0.0158109
myb	AT3G11280	OS05G0449900	37.1429	0.00550241	0.0985242
myb	AT3G11280	OS01G0853700	38.796	0.00550241	0.0157306
PAT1	AT5G48150	OS07G0583600	50.9191	0.00550241	0.0273652
glycerophosphoryl diester phosphodiesterase	AT5G41080	OS08G0535700	45.0237	0.00550904	0.0641922
-	AT1G07040	OS10G0463800	56.3187	0.00550935	0.10939
vestitone reductase	AT4G35250	OS08G0553800	79.2746	0.00553426	0.108395
oxidoreductase	AT5G16980	OS12G0225900	47.5362	0.00555215	0.088397
CYP710A1	AT2G34500	OS01G0211600	65.445	0.00573389	0.042772
4-alpha-hydroxytetrahydrobiopterin dehydratase	AT5G51110	OS03G0100200	45.8128	0.00573754	0.0382978
1-phosphatidylinositol phosphodiesterase	AT4G38690	OS09G0535900	63.5015	0.00575571	0.0379648
SDP1	AT5G04040	OS01G0762000	52.6052	0.00578925	0.103978
ATRR3	AT2G41310	OS01G0952500	53.4483	0.00579422	0.180352
SPX3	AT2G45130	OS07G0614700	35.8209	0.0058171	0.00456826
SPX3	AT2G45130	OS10G0392600	46.2094	0.0058171	0.00302366
-	AT1G67600	OS01G0901800	54.9708	0.00584599	0.013632
-	AT1G67600	OS01G0901800	54.9708	0.00584599	0.0198079
-	AT1G67600	OS08G0127500	55.9783	0.00584599	0.106005
-	AT1G67600	OS04G0486900	56.8627	0.00584599	0.167706
GSTU12	AT1G69920	OS10G0481300	40.6863	0.0059305	0.12724
PAP15	AT3G07130	OS03G0848200	68.3628	0.0059305	0.0139857
WCOR413-LIKE	AT2G15970	OS03G0767800	56.6667	0.0059305	0.0770115
FRK1	AT2G19190	OS09G0356800	34.7775	0.0059566	0.13204
FRK1	AT2G19190	OS09G0355400	37.4718	0.0059566	0.157254
protease	AT1G79720	OS09G0423500	45.4545	0.0059566	0.153241
mannose-P-dolichol synthase	AT1G20575	OS03G0824400	84.7737	0.00601444	0.0896949
IREG3	AT5G26820	OS05G0131500	26.2467	0.00612123	0.0551303
-	AT4G39840	OS08G0411300	28.4232	0.00617504	0.203314
FLA8	AT2G45470	OS03G0128000	46.6334	0.00618073	0.0117102
FLA8	AT2G45470	OS04G0574200	53.3643	0.00618073	0.0330842
polcalcin	AT1G24620	OS01G0949500	42.7027	0.00621047	0.0538802
pathogenesis-related thaumatin	AT1G75800	OS03G0244200	48.1928	0.00622383	0.0490102
pathogenesis-related thaumatin	AT1G75800	OS03G0244200	48.1928	0.00622383	0.0946257
HAT4	AT4G16780	OS10G0561800	39.8714	0.00636195	0.124646
ATPB	ATCG00480	OS10G0355800	90.4762	0.00644199	0.0804985
ATPB	ATCG00480	OS12G0207500	94.2197	0.00644199	0.0804985
malate dehydrogenase (NADP), chloroplast	AT5G58330	OS08G0562100	75.7506	0.00647056	0.012173
ANAC087	AT5G18270	OS11G0127600	32.8691	0.00649997	0.0800272
ANAC087	AT5G18270	OS03G0327100	41.6201	0.00649997	0.0464642
-	AT3G50370	OS03G0395600	31.6623	0.00649997	0.0641922
-	AT5G64190	OS07G0231800	44.4444	0.00655792	0.152172
-	AT5G64190	OS01G0165100	50.5976	0.00655792	0.0721978
DUR	AT5G44480	OS07G0139400	73.1591	0.00661838	0.132493
HSP23.5-M	AT5G51440	OS02G0758000	37.7273	0.00666224	0.00223143
SUS3	AT4G02280	OS03G0340500	79.2336	0.00666224	0.0856562
AOX1A	AT3G22370	OS02G0318100	56.0907	0.00675855	0.203083
nucellin	AT1G44130	OS11G0184800	40.9756	0.00677287	0.161324
nucellin	AT1G44130	OS11G0184600	43.4043	0.00677287	0.123122
HGO	AT5G54080	OS06G0103300	72.3404	0.00682864	0.105115
enzyme inhibitor/ pectinesterase/ pectinesterase inhibitor	AT1G14890	OS10G0186200	20.1646	0.00687755	0.0307018
enzyme inhibitor/ pectinesterase/ pectinesterase inhibitor	AT1G14890	OS10G0185400	30.837	0.00687755	0.184492
ENTH	AT4G25940	OS06G0661400	66.4	0.00700106	0.170089
binding	AT1G15290	OS04G0645100	43.3721	0.00700636	0.00501935
GUN4	AT3G59400	OS11G0267000	45.0549	0.00700684	0.0417539
MATE efflux	AT1G11670	OS03G0572900	61	0.00703477	0.140216
MATE efflux	AT1G11670	OS03G0571900	62.1154	0.00703477	0.158453
xanthine/uracil permease	AT5G49990	OS08G0420600	72.4203	0.0070633	0.154391
xanthine/uracil permease	AT5G49990	OS03G0823800	74.8582	0.0070633	0.0246607
-	AT3G55250	OS05G0526200	51.6605	0.00710066	0.0190397
zinc finger	AT5G24930	OS10G0560400	23.569	0.00710386	0.0657781
zinc finger	AT5G24930	OS10G0560400	23.569	0.00710386	0.204126
ALDH7B4	AT1G54100	OS09G0440300	77.7996	0.00711909	0.13621
RHA3B	AT4G35480	OS09G0554200	33.3333	0.00711909	0.0989822
RHA3B	AT4G35480	OS09G0554200	33.3333	0.00711909	0.144238
pectinase	AT5G41870	OS02G0256100	58.2393	0.00713536	0.0424689
pectinase	AT5G41870	OS01G0618900	62.614	0.00713536	0.0102713
-	AT5G57510	OS08G0448100	29.878	0.00713536	0.0131188
transferase, transferring glycosyl groups	AT2G03360	OS01G0956200	28.9206	0.00722183	0.0401234
ozone-responsive stress	AT1G01170	OS06G0114500	68.3544	0.00722891	0.0139272
HHOA	AT4G18370	OS12G0616600	25.641	0.00723811	0.100903
nodulin	AT2G28120	OS12G0637700	47.9094	0.0072485	0.00441845
nodulin	AT2G28120	OS12G0637700	47.9094	0.0072485	0.0250777
GDH1	AT5G18170	OS03G0794500	85.4015	0.00733135	0.185417
-	AT1G27100	OS07G0191600	35.6608	0.00740145	0.0883294
-	AT1G27100	OS07G0191600	35.6608	0.00740145	0.120999
BCAT6	AT1G50110	OS03G0231600	49.8795	0.00742149	0.0946257
GSL6	AT1G05570	OS02G0832400	72.2635	0.00742149	0.169673
GSL6	AT1G05570	OS02G0832500	74.9196	0.00742149	0.0981721
ACS7	AT4G26200	OS05G0196600	63.9381	0.00747755	0.0685201
F-box	AT2G27310	OS11G0155100	30.3116	0.00747755	0.16824
F-box	AT2G27310	OS02G0535901	30.3797	0.00747755	0.0688323
F-box	AT2G27310	OS04G0414500	33.0508	0.00747755	0.032783
-	AT2G26110	OS05G0540900	17.8191	0.00756017	0.00777939
-	AT2G26110	OS06G0566500	28.91	0.00756017	0.12659
CLV2	AT1G65380	OS02G0603100	42.0032	0.00767519	0.0973895
oxidoreductase	AT5G63620	OS08G0109200	67.0561	0.00767519	0.0382978
SCPL12	AT2G22920	OS10G0101200	38.7712	0.00767519	0.185533
SCPL12	AT2G22920	OS04G0176400	44.1113	0.00767519	0.107287
-	AT2G33250	OS01G0680600	20.9302	0.00767519	0.0849915
-	AT2G33250	OS01G0680600	20.9302	0.00767519	0.18523
-	AT4G01897	OS03G0564200	52.1008	0.00772871	0.021209
EEL	AT2G41070	OS05G0489700	43.8806	0.00774267	0.147814
EEL	AT2G41070	OS05G0489700	43.8806	0.00774267	0.198412
MAP65-6	AT2G01910	OS03G0237600	53.6066	0.00780577	0.0200313
MAP65-6	AT2G01910	OS03G0237600	53.6066	0.00780577	0.0830437
protein binding	AT1G77770	OS02G0566500	30.3867	0.00788192	0.093766
protein binding	AT1G77770	OS04G0448100	34.4569	0.00788192	0.203999
BGLU44	AT3G18080	OS03G0703100	55.6338	0.0080844	0.0910932
BGLU44	AT3G18080	OS03G0703000	60.9127	0.0080844	0.13545
SPX1	AT5G20150	OS02G0202200	52.8571	0.008306	0.00200559
SPX1	AT5G20150	OS06G0603600	58.6441	0.008306	0.0159972
FIS1A	AT3G57090	OS01G0951800	64.4172	0.00830941	0.061214
-	AT3G25640	OS02G0709600	40	0.00842188	0.159376
-	AT3G25640	OS05G0577100	43.4343	0.00842188	0.109696
-	AT3G25640	OS05G0577100	43.4343	0.00842188	0.126538
AAA-type ATPase	AT3G28510	OS07G0192000	43.9922	0.00855676	0.0197908
PDCB3	AT1G18650	OS03G0756300	38.8571	0.0085789	0.0540545
hydrolase	AT4G24160	OS09G0520200	75.3623	0.008616	0.00755387
SRG3	AT3G02040	OS08G0535700	43.6019	0.00867946	0.0641922
armadillo/beta-catenin repeat	AT2G45720	OS03G0116900	57.016	0.00869072	0.0444906
armadillo/beta-catenin repeat	AT2G45720	OS03G0116900	57.016	0.00869072	0.0571188
armadillo/beta-catenin repeat	AT2G45720	OS10G0522601	60.7143	0.00869072	0.163413
SPP1	AT1G51420	OS01G0376700	56.5012	0.00869072	0.0470831
SPP1	AT1G51420	OS02G0143100	58.6288	0.00869072	0.0481256
AK-HSDH II	AT4G19710	OS08G0342400	70.2497	0.0087057	0.0856608
AK-HSDH II	AT4G19710	OS08G0342400	70.2497	0.0087057	0.195573
CYCD4;1	AT5G65420	OS07G0620800	33.427	0.008798	0.0557053
ADF4	AT5G59890	OS05G0113400	81.1594	0.00882658	0.032478
ADF4	AT5G59890	OS05G0113400	81.1594	0.00882658	0.041193
GLUC	AT3G03640	OS04G0474500	41.9795	0.00882658	0.0539506
GLUC	AT3G03640	OS04G0474500	41.9795	0.00882658	0.156514
GLUC	AT3G03640	OS06G0320200	46.2338	0.00882658	0.110295
transport	AT2G23360	OS04G0505000	22.7696	0.00885603	0.0190397
transport	AT2G23360	OS04G0649200	28.8503	0.00885603	0.0120841
ripening-responsive	AT1G47530	OS08G0550200	49.8084	0.00896983	0.0876686
-	AT4G25170	OS04G0550700	20.9677	0.00910392	0.204777
-	AT4G25170	OS02G0657700	24.4648	0.00910392	0.0352122
phosphoinositide phosphatase	AT1G17340	OS10G0390900	28.9634	0.0091568	0.19145
-	AT1G19380	OS07G0607500	34.1463	0.0091667	0.108493
-	AT1G19380	OS03G0411600	35.5828	0.0091667	0.182751
E12A11	AT1G18100	OS01G0111600	58.046	0.00919928	0.0952402
-	AT2G35820	OS01G0833200	56.1497	0.009205	0.145835
AGO2	AT1G31280	OS04G0615700	38.2012	0.00923998	0.100545
integral membrane	AT4G15610	OS07G0442900	37.1981	0.00925457	0.0770891
PAP17	AT3G17790	OS10G0116800	47.4627	0.00953919	0.202107
PAP17	AT3G17790	OS03G0238600	50.4425	0.00953919	0.0772637
3-ketoacyl-CoA thiolase	AT5G47720	OS01G0110400	71.875	0.00961866	0.0515346
MUM2	AT5G63800	OS05G0428100	48.7053	0.00962486	0.0444975
BGAL3	AT4G36360	OS03G0165400	68.7277	0.00963945	0.160917
gibberellin-regulated	AT5G59845	OS03G0760800	55.914	0.00968406	0.0360955
ERF-6-6	AT4G17490	OS04G0547600	27.1341	0.00969612	0.0157896
LIP2	AT1G04640	OS03G0321800	61.8257	0.00969612	0.107495
Ndr	AT5G11790	OS06G0563000	70.1149	0.00969612	0.0272305
Ndr	AT5G11790	OS02G0224800	71.5517	0.00969612	0.0891213
Ndr	AT5G11790	OS01G0192600	73.487	0.00969612	0.0982671
phosphatase	AT1G73010	OS01G0600500	47.3684	0.00969612	0.140422
phosphatase	AT1G73010	OS01G0720400	53.6496	0.00969612	0.005295
PUB22	AT3G52450	OS01G0865700	42.7518	0.00969612	0.0559971
PUB22	AT3G52450	OS02G0539200	42.9864	0.00969612	0.107436
hydrolase	AT1G78210	OS07G0622700	40.6728	0.00973666	0.129707
-	AT1G21560	OS05G0423200	15.8568	0.00973666	0.0315487
chaperonin	AT2G38000	OS05G0316200	51.4957	0.0097495	0.153952
PRA1.G2	AT5G56230	OS03G0741600	17.9412	0.0097655	0.169994
-	AT5G12170	OS01G0955700	50.7973	0.0097655	0.0311584
-	AT5G12170	OS01G0955700	50.7973	0.0097655	0.0543262
-	AT5G12170	OS01G0955700	50.7973	0.0097655	0.0812544
U-box	AT1G01660	OS10G0548850	24.6914	0.00976978	0.00848062
U-box	AT1G01660	OS10G0552400	28.5383	0.00976978	0.137395
UXE1	AT1G30620	OS07G0139400	77.4347	0.00984452	0.132493
-	AT2G29510	OS03G0267600	20.0222	0.00989506	0.0532656
BSK3	AT4G00710	OS04G0684200	61.2069	0.00990875	0.156425
PABP	AT5G10350	OS02G0757900	68.0556	0.00990875	0.186049
-	AT1G68490	OS12G0600701	34.1615	0.00991123	0.0990026
NADP-ME1	AT2G19900	OS02G0665000	68.2796	0.0099761	0.162079
kinase	AT4G23280	OS07G0538700	33.3333	0.0101132	0.121693
kinase	AT4G23280	OS07G0537600	34.712	0.0101132	0.0952209
kinase	AT4G23280	OS07G0537900	34.9558	0.0101132	0.141675
kinase	AT4G23280	OS07G0537900	34.9558	0.0101132	0.176083
kinase	AT4G23280	OS07G0541900	36.6819	0.0101132	0.0808673
kinase	AT4G23280	OS07G0538200	37.0529	0.0101132	0.134594
kinase	AT4G23280	OS07G0540100	37.5	0.0101132	0.0317915
kinase	AT4G23280	OS10G0326900	48.3146	0.0101132	0.178016
kinase	AT4G23280	OS07G0538400	51.462	0.0101132	0.149759
kinase	AT2G42960	OS01G0664200	59.1463	0.0101745	0.174677
AGO1	AT1G48410	OS06G0729300	68.5935	0.0102314	0.190211
AGO1	AT1G48410	OS02G0831600	70.6231	0.0102314	0.115233
AGO1	AT1G48410	OS04G0566500	72.8429	0.0102314	0.0941152
-	AT4G17215	OS10G0206500	26.0638	0.0102392	0.136606
COL3	AT2G24790	OS10G0560400	19.1919	0.0102987	0.0657781
COL3	AT2G24790	OS10G0560400	19.1919	0.0102987	0.204126
bile acid:sodium symporter	AT3G25410	OS02G0475400	59.5745	0.0103817	0.0168152
-	AT5G58250	OS03G0331600	45.5172	0.010421	0.176083
FNR1	AT5G66190	OS06G0107700	76.5193	0.0104321	0.124211
lipase	AT5G18630	OS11G0655800	47.8142	0.0104456	0.103519
-	AT3G52920	OS04G0408600	51.4793	0.0104456	0.128152
zinc finger	AT3G46620	OS01G0972000	35.3293	0.010512	0.0419668
CDF2	AT5G39660	OS01G0277500	30.5054	0.0105904	0.0385859
emb2411	AT1G08840	OS04G0588200	53.604	0.0105904	0.183201
GLY3	AT1G53580	OS01G0667200	59.0164	0.0105904	0.0126112
SPS1F	AT5G20280	OS02G0184400	58.457	0.0105904	0.0348795
DNAJ	AT5G16650	OS02G0693200	65.2893	0.0105952	0.0266633
remorin	AT3G57540	OS07G0569100	39.8734	0.0106179	0.169746
remorin	AT3G57540	OS07G0208600	45.0382	0.0106179	0.0457376
LOX1	AT1G55020	OS03G0699700	57.1263	0.0107334	0.161145
WL2	AT2G34180	OS06G0543400	42.9961	0.010766	0.0951231
WL2	AT2G34180	OS01G0759400	52.4074	0.010766	0.005295
WL2	AT2G34180	OS01G0759400	52.4074	0.010766	0.0300205
WL2	AT2G34180	OS05G0514200	55.7087	0.010766	0.0272305
CBP60G	AT5G26920	OS11G0669100	15.0485	0.0108814	0.0181885
CBP60G	AT5G26920	OS03G0778000	15.1515	0.0108814	0.0200313
CBP60G	AT5G26920	OS12G0556300	19.0955	0.0108814	0.0495704
CBP60G	AT5G26920	OS12G0556300	19.0955	0.0108814	0.0509798
SEN2	AT1G20620	OS02G0115700	69.1057	0.0108958	0.139173
SRF8	AT4G22130	OS06G0634500	54.1936	0.0108958	0.0179076
zinc ion binding	AT5G12440	OS03G0329200	30.2806	0.0108958	0.161391
scarecrow TF	AT2G45160	OS02G0663100	27.4126	0.0111409	0.159446
scarecrow TF	AT2G45160	OS10G0551200	37.1859	0.0111409	0.0247419
malate dehydrogenase (NAD), mitochondrial	AT3G15020	OS01G0649100	83.2353	0.0111453	0.0592767
plastocyanin-like	AT4G12880	OS07G0112700	20.7865	0.0111453	0.128018
plastocyanin-like	AT4G12880	OS03G0758500	27.2727	0.0111453	0.153643
plastocyanin-like	AT4G12880	OS03G0758500	27.2727	0.0111453	0.160524
-	AT1G29980	OS01G0756600	64.1604	0.0111453	0.112739
-	AT1G29980	OS01G0756600	64.1604	0.0111453	0.118606
-	AT1G29980	OS01G0531400	67.7536	0.0111453	0.118606
pectinacetylesterase	AT5G45280	OS04G0602500	47.8541	0.0111468	0.127426
-	AT1G03290	OS05G0394900	16.0858	0.0111498	0.0538809
-	AT1G03290	OS10G0315400	40.7018	0.0111498	0.172345
WR3	AT5G50200	OS02G0595900	13.6364	0.0112435	0.177584
proline-rich	AT1G64450	OS05G0238400	39.485	0.0112439	0.0433599
U-box	AT2G45920	OS10G0548850	24.9383	0.0112439	0.00848062
U-box	AT2G45920	OS10G0552400	26.9142	0.0112439	0.137395
MATE efflux	AT1G66760	OS05G0554000	46.3235	0.011258	0.0125922
-	AT5G08050	OS12G0575000	46.8421	0.011258	0.0534479
SDR	AT5G18210	OS07G0561500	52.0755	0.0113075	0.101164
myb	AT3G16350	OS08G0144000	34.4648	0.0113184	0.0884132
myb	AT3G16350	OS10G0561400	50	0.0113184	0.164174
RKL1	AT1G48480	OS04G0463000	44.2451	0.0113492	0.132458
RKL1	AT1G48480	OS03G0223000	51.5556	0.0113492	0.0423826
CYP710A2	AT2G34490	OS01G0211600	62.3037	0.0113788	0.042772
-	AT5G23850	OS04G0534100	47.7169	0.0113788	0.109539
-	AT5G23850	OS04G0534100	47.7169	0.0113788	0.131758
PP2-A11	AT1G63090	OS02G0224900	36.2869	0.0114153	0.012351
PP2-A11	AT1G63090	OS02G0224900	36.2869	0.0114153	0.0897906
PP2-A11	AT1G63090	OS10G0522400	40	0.0114153	0.0310732
PP2-A11	AT1G63090	OS04G0571300	49.6711	0.0114153	0.0514653
PP2-A11	AT1G63090	OS04G0571300	49.6711	0.0114153	0.173968
PP2-A11	AT1G63090	OS03G0116700	50.8418	0.0114153	0.082566
RCCR	AT4G37000	OS10G0389300	35.2941	0.0114153	0.0193837
RCCR	AT4G37000	OS10G0389200	36.1702	0.0114153	0.170744
TRXF1	AT3G02730	OS01G0913000	52.9412	0.0114153	0.0194206
P58IPK	AT5G03160	OS02G0195300	65.3361	0.0114582	0.14073
P58IPK	AT5G03160	OS01G0977200	65.991	0.0114582	0.14073
FAD-binding	AT1G26410	OS06G0548800	37.4765	0.0114665	0.165181
FAD-binding	AT1G26410	OS02G0235900	37.5661	0.0114665	0.0207655
FAD-binding	AT1G26410	OS06G0549300	40.3442	0.0114665	0.163094
FAD-binding	AT1G26410	OS06G0549300	40.3442	0.0114665	0.175322
C2	AT1G70810	OS07G0500300	41.0405	0.0115908	0.0457174
ZIK3	AT3G22420	OS07G0572800	43.1818	0.0116103	0.0906038
threonine synthase	AT1G72810	OS01G0693800	69.7143	0.0116261	0.0458728
RLK	AT5G67280	OS06G0638500	38.5845	0.0116467	0.193631
PAP23	AT4G13700	OS08G0280100	50	0.0117935	0.115092
HIS1-3	AT2G18050	OS06G0130800	26.25	0.0120134	0.0419668
zinc finger	AT4G27240	OS01G0785900	53.1959	0.012014	0.17372
ETFQO	AT2G43400	OS10G0516300	55.2941	0.0120157	0.0392848
GA3	AT5G25900	OS06G0569500	49.0196	0.0120211	0.17151
MES16	AT4G16690	OS11G0118000	38.8889	0.0120752	0.072474
MES16	AT4G16690	OS12G0117200	38.8889	0.0120752	0.072474
kinase	AT1G34110	OS06G0589800	67.5373	0.0121289	0.182967
MCP1B	AT1G02170	OS10G0565100	58.6433	0.0121289	0.0760183
SKP2A	AT1G21410	OS05G0425700	63.5638	0.0121795	0.0303144
AP2	AT5G51190	OS04G0547600	25.3049	0.0122401	0.0157896
HIN1	AT5G06330	OS04G0416700	36.3636	0.0122401	0.0126508
HIN1	AT5G06330	OS02G0538700	36.6071	0.0122401	0.0194206
HIN1	AT5G06330	OS12G0159600	43.3962	0.0122401	0.110482
PPCK2	AT3G04530	OS04G0517500	36.2069	0.0122401	0.0271844
PPCK2	AT3G04530	OS02G0807000	47.7509	0.0122401	0.0733035
bHLH	AT5G62610	OS03G0802900	47.9245	0.0122614	0.103181
GUS2	AT5G07830	OS03G0211700	52.8651	0.0122614	0.08124
GUS2	AT5G07830	OS03G0211700	52.8651	0.0122614	0.172089
MIF	AT3G51660	OS11G0107500	42.9752	0.0122614	0.133656
MIF	AT3G51660	OS11G0107500	42.9752	0.0122614	0.136177
MIF	AT3G51660	OS11G0107500	42.9752	0.0122614	0.163638
HIN1	AT2G35460	OS12G0159000	24.4792	0.0122917	0.0760275
HIN1	AT2G35460	OS01G0864300	30.2905	0.0122917	0.0403984
HIN1	AT2G35460	OS04G0685300	33.1707	0.0122917	0.185417
ADF5	AT2G16700	OS03G0243100	73.4266	0.0123076	0.060041
NAK	AT5G02290	OS01G0973500	60.2941	0.0124967	0.107116
NAK	AT5G02290	OS05G0110900	63.2911	0.0124967	0.0897182
PPC3	AT3G14940	OS01G0758300	83.7662	0.0124967	0.00779844
PPC3	AT3G14940	OS08G0366000	86.3071	0.0124967	0.128799
CYP72A8	AT3G14620	OS01G0627500	8.98662	0.012542	0.00191364
CYP72A8	AT3G14620	OS01G0627600	41.4458	0.012542	0.005295
CYP72A8	AT3G14620	OS01G0627400	44.2238	0.012542	0.202291
CYP72A8	AT3G14620	OS01G0627800	46.0674	0.012542	0.00720461
CYP72A8	AT3G14620	OS01G0628700	47.081	0.012542	0.105163
CYP72A8	AT3G14620	OS05G0372300	47.5915	0.012542	0.0294148
CYP72A8	AT3G14620	OS01G0728300	49.1329	0.012542	0.083566
CBL7	AT4G26560	OS12G0162400	58.8496	0.012544	0.0365673
DNA mismatch repair MutS	AT5G54090	OS10G0509000	49.4465	0.0126205	0.0815237
DNA mismatch repair MutS	AT5G54090	OS10G0509000	49.4465	0.0126205	0.181535
DNA mismatch repair MutS	AT5G54090	OS10G0509000	49.4465	0.0126205	0.189902
POT	AT5G62680	OS12G0638200	48.1293	0.0126278	0.18477
POT	AT5G62680	OS12G0638300	50.2555	0.0126278	0.0416034
calmodulin	AT1G66400	OS05G0223000	38.0952	0.0126481	0.174446
calmodulin	AT1G66400	OS01G0135700	39.2265	0.0126481	0.170594
exostosin	AT4G16745	OS01G0640600	50.2994	0.0126782	0.0593841
FHA	AT5G47790	OS08G0326100	53.2066	0.0126782	0.117672
XYL4	AT5G64570	OS04G0640700	68.366	0.0126782	0.0718499
PRLI-interacting factor	AT5G58720	OS01G0225100	19.5035	0.0126933	0.0278114
PRLI-interacting factor	AT5G58720	OS01G0225100	19.5035	0.0126933	0.107563
histone H2B	AT2G28720	OS03G0279000	80.9211	0.0127889	0.0767013
aspartic-type endopeptidase	AT5G48430	OS01G0937600	23.3032	0.0128265	0.0219586
aspartic-type endopeptidase	AT5G48430	OS01G0937500	24.1535	0.0128265	0.0924898
aspartic-type endopeptidase	AT5G48430	OS01G0937100	24.5823	0.0128265	0.167743
aspartic-type endopeptidase	AT5G48430	OS01G0937800	25.1152	0.0128265	0.098926
aspartic-type endopeptidase	AT5G48430	OS01G0937200	30.3483	0.0128265	0.0366563
aspartic-type endopeptidase	AT5G48430	OS01G0937200	30.3483	0.0128265	0.0583676
aspartic-type endopeptidase	AT5G48430	OS01G0937200	30.3483	0.0128265	0.110371
MORN repeat /phosphatidylinositol-4-phosphate 5-kinase	AT1G77660	OS08G0469700	61.6487	0.0128293	0.0914328
ferredoxin	AT1G32550	OS03G0685000	64.4809	0.0128644	0.164986
PCS1	AT5G44070	OS05G0415200	62.6016	0.013294	0.153045
DNA-binding	AT3G11580	OS12G0157000	24.2857	0.0134239	0.0519136
DNA binding	AT1G12400	OS07G0573600	41.2214	0.0135254	0.134482
DNA binding	AT1G12400	OS05G0198700	65.4321	0.0135254	0.134482
extensin	AT5G54855	OS02G0317800	59.3548	0.0135261	0.142692
protein binding	AT1G10650	OS02G0130300	35.5685	0.0135261	0.014023
protein binding	AT1G10650	OS02G0130300	35.5685	0.0135261	0.12708
TMK1	AT1G66150	OS03G0717000	62.2328	0.0135261	0.142895
TMK1	AT1G66150	OS03G0717000	62.2328	0.0135261	0.202068
TR-BAMY	AT3G23920	OS03G0141200	63.1957	0.0136921	0.117927
DCL3	AT3G43920	OS10G0485600	39.4916	0.0137556	0.139657
STH2	AT1G75540	OS04G0540200	40	0.013756	0.100529
intracellular transport USO1	AT1G64180	OS02G0260500	29.3763	0.013797	0.0164619
RALFL23	AT3G16570	OS05G0203000	28.4672	0.0138239	0.103887
RALFL23	AT3G16570	OS01G0357900	39.3162	0.0138239	0.0244306
RALFL23	AT3G16570	OS01G0257100	39.6947	0.0138239	0.100428
RALFL23	AT3G16570	OS02G0670500	41.1765	0.0138239	0.00494292
RALFL23	AT3G16570	OS01G0358100	42.2414	0.0138239	0.0427021
RALFL23	AT3G16570	OS11G0456000	43.2692	0.0138239	0.108435
CYSC1	AT3G61440	OS04G0165700	67.9045	0.013852	0.0476646
-	AT1G47740	OS03G0198500	62.753	0.0138882	0.151539
aldo/keto reductase	AT2G37770	OS05G0456300	67.4847	0.0139125	0.0311774
aldo/keto reductase	AT2G37770	OS01G0847600	69.7749	0.0139125	0.0481298
aldo/keto reductase	AT2G37770	OS01G0847700	71.0611	0.0139125	0.106304
scpl26	AT2G35780	OS01G0158200	62.6327	0.0139125	0.085057
scpl26	AT2G35780	OS01G0833500	68.0617	0.0139125	0.123799
hexose transporter	AT1G67300	OS02G0274900	66.9439	0.0139194	0.18516
SPT	AT4G36930	OS02G0805250	29.6429	0.01395	0.0227786
SPT	AT4G36930	OS06G0164400	38.5787	0.01395	0.18232
zinc finger	AT5G42200	OS02G0178600	44	0.01395	0.191921
BTB	AT1G55760	OS08G0495500	55.4545	0.0139972	0.0131679
kinase	AT5G58150	OS08G0276400	43.289	0.0140235	0.0316676
HCF107	AT3G17040	OS03G0308800	54.3131	0.014058	0.175917
DFL1	AT5G54510	OS01G0221100	34.1991	0.0141225	0.0214643
DFL1	AT5G54510	OS01G0221100	34.1991	0.0141225	0.0215287
DFL1	AT5G54510	OS01G0221100	34.1991	0.0141225	0.0909631
DFL1	AT5G54510	OS01G0221100	34.1991	0.0141225	0.147494
DFL1	AT5G54510	OS11G0186500	35.2365	0.0141225	0.121301
SMO1-2	AT4G22756	OS10G0545200	63.1229	0.0141289	0.102879
TED4	AT2G26670	OS06G0603000	58.1315	0.0142021	0.174665
CYP81F2	AT5G57220	OS03G0760200	41.3255	0.0143166	0.0407963
CYP81F2	AT5G57220	OS02G0503850	44.6429	0.0143166	0.162151
LPAT4	AT1G75020	OS05G0502200	51.8892	0.0143166	0.185006
DHAR2	AT1G75270	OS05G0116100	69.0141	0.0143407	0.0907518
-	AT4G28703	OS04G0509400	51.3761	0.0144946	0.0542118
catalytic	AT5G39970	OS07G0193000	48.2759	0.014542	0.142778
catalytic	AT5G39970	OS12G0639600	52.1614	0.014542	0.0533233
catalytic	AT5G39970	OS12G0639600	52.1614	0.014542	0.0680505
catalytic	AT5G39970	OS03G0691800	53.0086	0.014542	0.106955
3'(2'),5'-bisphosphate nucleotidase	AT5G09290	OS12G0183300	53.5	0.0146784	0.0972604
ER lumen retaining receptor	AT1G75760	OS08G0548200	82.3529	0.0146784	0.0102713
permease	AT3G23870	OS02G0498300	50.3817	0.0146784	0.0331393
permease	AT3G23870	OS04G0373000	67.4825	0.0146784	0.0207655
metallocarboxypeptidase/ zinc ion binding	AT5G42320	OS02G0119300	48.9655	0.0146869	0.155909
-	AT3G14700	OS02G0511500	19.5402	0.0146968	0.133873
SEC1B	AT4G12120	OS04G0252400	60.3053	0.0148213	0.00489578
SEC1B	AT4G12120	OS04G0252400	60.3053	0.0148213	0.201921
ANNAT2	AT5G65020	OS06G0221200	61.1987	0.0150109	0.103978
RNS2	AT2G39780	OS01G0897300	43.8849	0.0151165	0.125792
-	AT4G16050	OS10G0194300	13.6891	0.0152518	0.142307
glucan phosphorylase	AT3G29320	OS03G0758100	73.2662	0.0154116	0.0493676
kelch repeat	AT3G27220	OS04G0487100	61.4286	0.0154116	0.111411
-	AT4G35870	OS03G0137400	62.2475	0.0154116	0.108027
NF-YA3	AT1G72830	OS02G0776400	27.037	0.0154781	0.0735981
DWF2	AT4G39400	OS01G0718300	56.0214	0.0155213	0.0169398
-	AT4G24380	OS04G0450100	57.9592	0.0155568	0.115092
PPR	AT5G04810	OS04G0684500	54.0511	0.0156273	0.0200648
transferase	AT5G42830	OS06G0103200	42.5163	0.0156692	0.103085
transferase	AT5G42830	OS11G0244100	42.6778	0.0156692	0.130987
transferase	AT5G42830	OS11G0244100	42.6778	0.0156692	0.131674
-	AT5G19250	OS07G0645000	43.8144	0.015718	0.0669099
TPS9	AT1G23870	OS08G0414700	62.065	0.0158983	0.0515247
TF	AT3G10040	OS01G0318400	25.7669	0.0159075	0.192115
RABH1e	AT5G10260	OS03G0191400	77.6744	0.0159994	0.141679
PIS2	AT4G38570	OS06G0492000	31.6456	0.0160258	0.0346149
RLP24	AT2G33020	OS12G0211500	25.6716	0.0160978	0.183458
-	AT3G06035	OS07G0645000	42.7835	0.016114	0.0669099
SRK2G	AT5G08590	OS05G0433100	50.813	0.0161177	0.149245
SRK2G	AT5G08590	OS01G0869900	65.0485	0.0161177	0.0329356
SRK2G	AT5G08590	OS02G0551100	72.8767	0.0161177	0.0384864
SRK2G	AT5G08590	OS04G0432000	75.4875	0.0161177	0.0207655
C/VIF2	AT5G64620	OS08G0108100	27.7533	0.0161415	0.0607871
PLPC	AT2G02710	OS01G0186200	46.3291	0.0161415	0.0811012
-	AT3G27880	OS05G0578100	21.8954	0.0161415	0.134194
-	AT3G27880	OS01G0639600	26.6129	0.0161415	0.0619072
-	AT3G27880	OS05G0568600	27.2727	0.0161415	0.171275
PRLI-interacting factor K	AT4G15420	OS01G0534800	60.8084	0.016198	0.0578455
ZIFL2	AT3G43790	OS11G0136400	48.5577	0.016198	0.168614
ZIFL2	AT3G43790	OS01G0279400	50.9054	0.016198	0.188369
ZIFL2	AT3G43790	OS11G0135000	53.617	0.016198	0.0606632
ZIFL2	AT3G43790	OS12G0133100	54.9801	0.016198	0.0632234
HWS	AT3G61590	OS01G0659900	52.7981	0.0163093	0.139838
HWS	AT3G61590	OS02G0260200	54.6569	0.0163093	0.0812544
NFU3	AT4G25910	OS06G0694500	61.1872	0.0163245	0.126676
lipid-associated	AT2G22170	OS02G0753300	40.9326	0.0163639	0.126255
lipid-associated	AT2G22170	OS04G0456700	40.9326	0.0163639	0.0451564
calcium-binding	AT5G44460	OS08G0144100	52.0408	0.0164467	0.0907518
dirigent	AT4G23690	OS07G0636800	45.5446	0.0164739	0.114389
EBF2	AT5G25350	OS06G0605900	41.6268	0.0164778	0.0407148
EBF2	AT5G25350	OS02G0200900	44.5455	0.0164778	0.170008
CPK13	AT3G51850	OS01G0832300	77.4955	0.0164872	0.0242921
CPK13	AT3G51850	OS01G0832300	77.4955	0.0164872	0.124548
CPK13	AT3G51850	OS05G0467000	78.0622	0.0164872	0.0217295
PIPK1	AT1G21980	OS03G0262000	59.3607	0.0164872	0.0299626
PIPK1	AT1G21980	OS03G0705300	63.8851	0.0164872	0.0167712
PII	AT4G01900	OS05G0133100	50	0.016512	0.0201391
42979	AT4G34190	OS11G0621400	41.9847	0.016512	0.054189
dihydrolipoyl dehydrogenase	AT4G16155	OS01G0337900	78.2531	0.0165705	0.0457301
dihydrolipoyl dehydrogenase	AT4G16155	OS05G0156700	83.691	0.0165705	0.141465
-	AT5G19855	OS07G0569600	47.1503	0.0165705	0.0252045
heavy-metal-associated	AT1G01490	OS03G0126700	47.1795	0.0166158	0.0567651
rubredoxin	AT1G54500	OS08G0323400	46.5438	0.016658	0.0199752
rubredoxin	AT1G54500	OS08G0323400	46.5438	0.016658	0.0697118
-	AT2G39650	OS01G0973600	45.4006	0.0166711	0.094301
SBPASE	AT3G55800	OS04G0234600	73.7245	0.0168649	0.134505
ADF9	AT4G34970	OS03G0243100	69.2308	0.0168852	0.060041
AMY3	AT1G69830	OS01G0715400	49.7717	0.0168852	0.0695301
AMY3	AT1G69830	OS01G0715400	49.7717	0.0168852	0.0729492
-	AT4G14760	OS12G0605100	13.1356	0.0168852	0.0547086
-	AT4G14760	OS03G0637900	21.1628	0.0168852	0.00456826
TPT	AT5G46110	OS05G0241200	67.3267	0.0169084	0.0200297
TPT	AT5G46110	OS05G0241200	67.3267	0.0169084	0.203334
TPT	AT5G46110	OS01G0239200	71.223	0.0169084	0.155895
RABH1c	AT4G39890	OS03G0191400	71.1628	0.0169578	0.141679
BPM6	AT3G43700	OS07G0167200	61.7925	0.0171572	0.1402
anac016	AT1G34180	OS09G0493700	20.9402	0.0172134	0.0236993
PFK3	AT4G26270	OS06G0151900	66.0256	0.0172134	0.0111984
PFK3	AT4G26270	OS06G0151900	66.0256	0.0172134	0.0671934
CSY2	AT3G58750	OS02G0232400	80	0.0172471	0.00878399
-	AT3G04550	OS10G0445600	39.2324	0.0172544	0.0454123
methyltransferase	AT3G01660	OS04G0481300	58.9552	0.0173342	0.0714293
SOT18	AT1G74090	OS12G0270900	35.503	0.0173967	0.112701
SOT18	AT1G74090	OS07G0605800	36.7347	0.0173967	0.0694465
cysteinease inhibitor	AT2G31980	OS04G0350100	29.8013	0.0174592	0.0755038
cysteinease inhibitor	AT2G31980	OS01G0915200	31.6456	0.0174592	0.14325
pectinase	AT3G62110	OS07G0245200	57.1749	0.0176057	0.108279
pectinase	AT3G62110	OS03G0833800	61.3445	0.0176057	0.0979263
-	AT5G28500	OS10G0445600	41.1514	0.0176057	0.0454123
isocitrate dehydrogenase	AT3G09810	OS01G0276100	76.5193	0.0176509	0.127096
kinase	AT4G14350	OS10G0476100	71.7803	0.0176509	0.162778
kinase	AT2G27060	OS03G0320800	45.4034	0.0177182	0.079717
lipase	AT1G28570	OS01G0650900	30.6122	0.0178383	0.193354
lipase	AT1G28570	OS10G0394000	37.574	0.0178383	0.183303
lipase	AT1G28570	OS01G0612900	41.9118	0.0178383	0.168112
oxidoreductase	AT4G30720	OS05G0411200	65.6203	0.0178383	0.155109
TRXF2	AT5G16400	OS01G0913000	54.5455	0.0178383	0.0194206
LOL1	AT1G32540	OS08G0159500	60.3261	0.0178606	0.0183562
LOL1	AT1G32540	OS08G0159500	60.3261	0.0178606	0.0189828
LOL1	AT1G32540	OS08G0159500	60.3261	0.0178606	0.0227917
LOL1	AT1G32540	OS08G0159500	60.3261	0.0178606	0.0231542
MGD2	AT5G20410	OS02G0802700	60.8374	0.0179558	0.059532
MGD2	AT5G20410	OS08G0299400	71.3235	0.0179558	0.00757156
-	AT1G70900	OS08G0433200	64.8	0.0179558	0.00818441
ABC1	AT3G24190	OS02G0816600	74.2268	0.018034	0.00728538
RabGAP	AT1G04830	OS01G0908100	63.3152	0.018052	0.108525
BGLU18	AT1G52400	OS04G0474500	39.2491	0.018146	0.0539506
BGLU18	AT1G52400	OS04G0474500	39.2491	0.018146	0.156514
BGLU18	AT1G52400	OS06G0320200	44.1558	0.018146	0.110295
-	AT4G26130	OS05G0540900	16.7553	0.0182227	0.00777939
-	AT4G26130	OS06G0566500	20.8531	0.0182227	0.12659
-	AT2G46000	OS03G0148300	33.8776	0.0182629	0.173397
-	AT4G17790	OS04G0592600	69.2913	0.0184128	0.0948663
-	AT4G17790	OS02G0693500	70.9804	0.0184128	0.0761441
OPT3	AT4G16370	OS03G0751100	79.9207	0.018576	0.184697
kinase	AT1G73660	OS06G0232100	53.8462	0.0186825	0.0936245
NIK3	AT1G60800	OS01G0171000	67.8344	0.0186825	0.0363855
NIK3	AT1G60800	OS01G0171000	67.8344	0.0186825	0.0785234
zinc finger	AT2G42360	OS12G0108350	6.90335	0.0187167	0.0993894
zinc finger	AT2G42360	OS01G0755700	24.7899	0.0187167	0.0938508
TAF8	AT4G34340	OS03G0603300	31.5412	0.0187413	0.0510716
TAF8	AT4G34340	OS12G0574800	35.2459	0.0187413	0.162498
TAF8	AT4G34340	OS12G0574800	35.2459	0.0187413	0.166206
-	AT5G50100	OS04G0668800	50.7177	0.018806	0.0706797
zinc finger	AT4G25610	OS09G0570200	34.4383	0.018863	0.0111164
zinc finger	AT4G25610	OS09G0570200	34.4383	0.018863	0.0757609
VPS60.1	AT3G10640	OS01G0103000	72.8448	0.0189902	0.0748555
APK2B	AT2G02800	OS10G0405100	65.1869	0.0190306	0.0283178
APK2B	AT2G02800	OS10G0405100	65.1869	0.0190306	0.0886171
WRKY22	AT4G01250	OS02G0265200	31.3019	0.019108	0.114519
WRKY22	AT4G01250	OS02G0265200	31.3019	0.019108	0.18477
ADF6	AT2G31200	OS10G0521100	57.6159	0.0191273	0.0230796
FAD-binding	AT1G30740	OS02G0235900	35.9788	0.0191273	0.0207655
FAD-binding	AT1G30740	OS06G0548800	40.4896	0.0191273	0.165181
FAD-binding	AT1G30740	OS06G0549300	42.065	0.0191273	0.163094
FAD-binding	AT1G30740	OS06G0549300	42.065	0.0191273	0.175322
ROP10	AT3G48040	OS02G0742200	80.8411	0.0191273	0.0894229
ROP10	AT3G48040	OS06G0234200	80.9302	0.0191273	0.0554501
ROP10	AT3G48040	OS06G0234200	80.9302	0.0191273	0.0894195
GLR1.3	AT5G48410	OS06G0188600	20.2985	0.0193547	0.119153
SYTC	AT5G04220	OS06G0685300	55.1852	0.0194232	0.0963204
SYTC	AT5G04220	OS06G0685300	55.1852	0.0194232	0.199976
gibberellin-regulated	AT2G39540	OS03G0760800	54.8387	0.0194271	0.0360955
TAR2	AT4G24670	OS01G0169800	54.2056	0.0196816	0.0494755
USP	AT3G53990	OS01G0849600	50	0.0201266	0.121202
gsl11	AT3G59100	OS01G0533500	61.6071	0.0201582	0.0264449
gsl11	AT3G59100	OS01G0533500	61.6071	0.0201582	0.12526
gsl11	AT3G59100	OS01G0533500	61.6071	0.0201582	0.202355
CML39	AT5G42380	OS01G0955400	43.0464	0.020276	0.169834
NRT2;1AT	AT1G08090	OS02G0112100	71.4822	0.0202944	0.0426027
NRT2;1AT	AT1G08090	OS02G0112100	71.4822	0.0202944	0.0549263
NRT2;1AT	AT1G08090	OS02G0112100	71.4822	0.0202944	0.0738849
NRT2;1AT	AT1G08090	OS02G0112600	71.4822	0.0202944	0.0426027
NRT2;1AT	AT1G08090	OS02G0112600	71.4822	0.0202944	0.0549263
HSF A4A	AT4G18880	OS05G0530400	31.8083	0.0203018	0.0335725
HSF A4A	AT4G18880	OS01G0749300	37.9545	0.0203018	0.098638
ERD	AT4G22120	OS05G0594700	69.0601	0.0204039	0.0496511
ERD	AT4G22120	OS01G0534900	71.6146	0.0204039	0.0281488
ERD	AT4G22120	OS01G0534900	71.6146	0.0204039	0.104242
SCABP8	AT4G33000	OS01G0711500	61.2782	0.0204433	0.177849
F-box	AT1G15670	OS06G0594400	37.5328	0.0204665	0.0311584
nodulin	AT2G39210	OS12G0637700	51.5679	0.0204665	0.00441845
nodulin	AT2G39210	OS12G0637700	51.5679	0.0204665	0.0250777
carbohydrate binding	AT1G10150	OS07G0124000	33.5013	0.020469	0.0564387
NEK2	AT3G04810	OS03G0636800	58.7646	0.020469	0.14405
NEK2	AT3G04810	OS12G0604700	59.0525	0.020469	0.0907518
cytochrome c oxidase	AT1G02410	OS03G0718600	59.8361	0.0205002	0.126066
oxidoreductase	AT1G28030	OS08G0417100	30.2548	0.0205665	0.153055
oxidoreductase	AT1G28030	OS08G0417000	30.5466	0.0205665	0.0759955
protein binding	AT5G62910	OS02G0580800	33.3333	0.0205665	0.108525
protein binding	AT5G62910	OS02G0580800	33.3333	0.0205665	0.168046
protein binding	AT5G62910	OS04G0463700	34.2508	0.0205665	0.188588
WRKY46	AT2G46400	OS09G0334500	23.8227	0.020588	0.0759202
kinase	AT2G17220	OS02G0670100	50.4329	0.0206113	0.109539
kinase	AT2G17220	OS02G0118200	57.1429	0.0206113	0.135227
IAA17	AT1G04250	OS12G0601300	49.0975	0.0206641	0.0180827
bHLH093	AT5G65640	OS10G0544200	31.0526	0.020728	0.12054
bHLH093	AT5G65640	OS03G0135700	37.2881	0.020728	0.0742802
bile acid:sodium symporter	AT2G26900	OS01G0645200	71.599	0.0208131	0.0260254
bile acid:sodium symporter	AT2G26900	OS01G0645200	71.599	0.0208131	0.182863
SPL2	AT5G43270	OS02G0174100	35.0598	0.0209551	0.039214
SPL2	AT5G43270	OS02G0174100	35.0598	0.0209551	0.175925
ORG3	AT3G56980	OS01G0952800	29.1498	0.0209619	0.135592
calcium-binding	AT4G20780	OS08G0144100	51.0204	0.0209728	0.0907518
PUP17	AT1G57943	OS04G0587400	24.0196	0.0209789	0.0773837
PUP17	AT1G57943	OS04G0587400	24.0196	0.0209789	0.0936505
EXPA6	AT2G28950	OS03G0822000	77.2727	0.0212076	0.0341219
-	AT3G01060	OS05G0512200	76.0181	0.0212076	0.139424
-	AT3G01060	OS05G0512200	76.0181	0.0212076	0.171544
HSP18.2	AT5G59720	OS03G0266300	70.1863	0.0212295	0.0219958
HSP18.2	AT5G59720	OS03G0267000	72.0497	0.0212295	0.0800834
HSP18.2	AT5G59720	OS03G0267000	72.0497	0.0212295	0.12092
HSP18.2	AT5G59720	OS03G0266900	75.3247	0.0212295	0.112644
kinase	AT5G63410	OS11G0308800	38.5813	0.0212656	0.16762
ACX2	AT5G65110	OS11G0605500	74.392	0.0214774	0.0655893
NAD-dependent epimerase/dehydratase	AT4G20460	OS07G0139400	75.772	0.0214928	0.132493
RPL9	AT3G44890	OS02G0822600	61.4973	0.021532	0.0557384
zinc finger	AT5G66070	OS07G0479100	39.759	0.021532	0.095931
zinc finger	AT5G66070	OS06G0717600	43.5345	0.021532	0.131033
-	AT1G77220	OS05G0516900	61.0656	0.0215578	0.0153555
CID9	AT3G14450	OS09G0314500	38.8102	0.0215629	0.0976818
CID9	AT3G14450	OS02G0244600	49.5822	0.0215629	0.0800719
Got1-like	AT3G03180	OS07G0593400	59.4595	0.0215918	0.0645651
Got1-like	AT3G03180	OS07G0593400	59.4595	0.0215918	0.074184
Got1-like	AT3G03180	OS10G0337600	71.4286	0.0215918	0.173209
Got1-like	AT3G03180	OS10G0337600	71.4286	0.0215918	0.195631
Got1-like	AT3G03180	OS03G0209400	75.7143	0.0215918	0.111769
hydrolase	AT5G10700	OS04G0605200	55.6757	0.0215918	0.0847989
PHS2	AT3G46970	OS01G0851700	79.0725	0.0216963	0.0128853
-	AT5G24460	OS06G0712200	44.3983	0.0216963	0.0125922
-	AT1G70420	OS05G0578100	20.2614	0.0219866	0.134194
-	AT1G70420	OS01G0639600	25.4032	0.0219866	0.0619072
-	AT1G70420	OS05G0568600	27.7056	0.0219866	0.171275
coatomer complex, subunit beta 2	AT3G15980	OS02G0209100	73.591	0.0221386	0.190985
coatomer complex, subunit beta 2	AT3G15980	OS02G0209000	75.4902	0.0221386	0.190985
DTA2	AT2G45830	OS04G0534100	42.0091	0.0221746	0.109539
DTA2	AT2G45830	OS04G0534100	42.0091	0.0221746	0.131758
FAD-binding	AT1G26390	OS02G0235900	38.448	0.0222038	0.0207655
FAD-binding	AT1G26390	OS06G0548800	39.1714	0.0222038	0.165181
FAD-binding	AT1G26390	OS06G0549300	41.109	0.0222038	0.163094
FAD-binding	AT1G26390	OS06G0549300	41.109	0.0222038	0.175322
BGLU27	AT3G60120	OS04G0474500	42.3208	0.022226	0.0539506
BGLU27	AT3G60120	OS04G0474500	42.3208	0.022226	0.156514
BGLU27	AT3G60120	OS06G0320200	48.0519	0.022226	0.110295
TIC55	AT2G24820	OS02G0792800	62.5232	0.022226	0.130584
PAK	AT1G12430	OS06G0137100	77.972	0.0222465	0.0274824
PAK	AT1G12430	OS06G0137100	77.972	0.0222465	0.140279
mTERF	AT2G36000	OS03G0360600	36.8771	0.0223428	0.0337073
pyrrolidone-carboxylate peptidase	AT1G56700	OS07G0639600	68.4931	0.0223827	0.170744
NPR4	AT4G19660	OS03G0667100	42.9542	0.0225339	0.100986
NPR4	AT4G19660	OS01G0767900	45.5118	0.0225339	0.0645766
PAN	AT5G03700	OS02G0527900	39.4636	0.0225575	0.0871145
ATHB12	AT3G61890	OS04G0541700	31.746	0.022671	0.180648
BOR1	AT2G47160	OS12G0566000	77.4965	0.0227675	0.0966639
F-box	AT1G67480	OS02G0504900	54.5455	0.0228696	0.171021
BGAL16	AT1G77410	OS05G0428100	54.254	0.0230849	0.0444975
LRR1	AT5G16590	OS04G0463000	42.3019	0.0230849	0.132458
LRR1	AT5G16590	OS03G0223000	46.8148	0.0230849	0.0423826
pyrophosphate-dependent 6-phosphofructose-1-kinase	AT1G76550	OS02G0714200	77.6337	0.0230849	0.0335495
pyrophosphate-dependent 6-phosphofructose-1-kinase	AT1G76550	OS06G0326400	78.6174	0.0230849	0.193095
ZAT11	AT2G37430	OS03G0820300	25.2941	0.0230849	0.0328222
ZAT11	AT2G37430	OS05G0461200	27.6699	0.0230849	0.0797196
ZAT11	AT2G37430	OS01G0839100	28.655	0.0230849	0.0353662
ZAT11	AT2G37430	OS01G0838600	29.4931	0.0230849	0.162263
ZAT11	AT2G37430	OS03G0820400	31.25	0.0230849	0.0158109
-	AT2G45010	OS10G0560200	56.5957	0.0233103	0.102715
-	AT2G45010	OS03G0101800	59.144	0.0233103	0.0568738
hypoxia-responsive	AT5G27760	OS07G0673900	58.4158	0.0235818	0.0811012
UPF1	AT5G47010	OS07G0495900	82.694	0.0236086	0.122384
-	AT4G03150	OS12G0534100	47.093	0.023759	0.179033
-	AT1G01430	OS05G0214900	46.5306	0.0238149	0.180575
-	AT1G01430	OS06G0524400	46.7136	0.0238149	0.122986
AAA-type ATPase	AT1G64110	OS05G0584600	61.5205	0.0241297	0.0308385
AAA-type ATPase	AT1G64110	OS01G0226400	68.8095	0.0241297	0.0490954
AAA-type ATPase	AT1G64110	OS01G0226400	68.8095	0.0241297	0.153589
-	AT2G38820	OS10G0417800	38.8704	0.0241584	0.134834
-	AT5G13880	OS02G0505500	25.3456	0.0241647	0.138002
PP2C	AT5G06750	OS02G0685600	68.2171	0.0242653	0.00917259
WRKY71	AT1G29860	OS01G0626400	26.6491	0.0242653	0.152204
-	AT1G50040	OS07G0133500	43.9394	0.0242653	0.00831131
-	AT5G67020	OS08G0472400	31.25	0.0242823	0.145207
-	AT5G67020	OS09G0456700	49.7475	0.0242823	0.19145
RTE1	AT2G26070	OS05G0539800	54.9356	0.0243999	0.0926376
FAD-binding	AT2G46740	OS04G0361500	33.4426	0.0244014	0.0419305
FAD-binding	AT2G46740	OS04G0360500	43.0921	0.0244014	0.0907209
GSL03	AT2G31960	OS02G0832400	72.051	0.0244188	0.169673
GSL03	AT2G31960	OS02G0832500	73.3119	0.0244188	0.0981721
nucleolar gar2	AT2G42320	OS09G0487200	40.7692	0.0244188	0.0478594
nucleolar gar2	AT2G42320	OS08G0505200	47.8894	0.0244188	0.142282
IAA4	AT5G43700	OS03G0797800	41.1168	0.0244492	0.057119
IAA4	AT5G43700	OS03G0633800	42.9204	0.0244492	0.0539506
zinc finger	AT2G47890	OS03G0351100	23.8213	0.0244708	0.0312101
zinc finger	AT2G47890	OS07G0667300	26.3158	0.0244708	0.120952
FAD-binding	AT1G26380	OS02G0235900	36.6843	0.0245109	0.0207655
FAD-binding	AT1G26380	OS06G0548800	39.3597	0.0245109	0.165181
FAD-binding	AT1G26380	OS06G0549300	40.5354	0.0245109	0.163094
FAD-binding	AT1G26380	OS06G0549300	40.5354	0.0245109	0.175322
-	AT5G64180	OS12G0502100	54.9133	0.0245109	0.183473
hydrolase	AT5G58090	OS02G0139300	62.3722	0.0246646	0.143254
hydrolase	AT5G58090	OS02G0139300	62.3722	0.0246646	0.150011
ribosome	AT3G20230	OS02G0689700	60.7735	0.0246646	0.0856361
ribosome	AT3G20230	OS02G0689700	60.7735	0.0246646	0.202162
myb	AT5G05790	OS05G0449900	35.873	0.0246948	0.0985242
myb	AT5G05790	OS01G0853700	38.796	0.0246948	0.0157306
emb1997	AT2G28880	OS06G0699700	65.0602	0.0247211	0.137791
emb1997	AT2G28880	OS06G0699700	65.0602	0.0247211	0.1402
dentin sialophosphoprotein	AT5G64170	OS03G0387900	20.4545	0.0247475	0.00631673
dentin sialophosphoprotein	AT5G64170	OS03G0387900	20.4545	0.0247475	0.0110868
dentin sialophosphoprotein	AT5G64170	OS03G0387900	20.4545	0.0247475	0.0113993
dentin sialophosphoprotein	AT5G64170	OS03G0387900	20.4545	0.0247475	0.0209345
dentin sialophosphoprotein	AT5G64170	OS03G0387900	20.4545	0.0247475	0.0534135
FEI2	AT2G35620	OS03G0266800	68.0135	0.0249131	0.104245
EF-P	AT3G08740	OS11G0116400	62.4454	0.0249842	0.0804985
EF-P	AT3G08740	OS12G0115900	62.8821	0.0249842	0.0804985
-	AT2G16190	OS12G0236600	21.8023	0.0249842	0.0873596
-	AT2G16190	OS05G0549300	25.2252	0.0249842	0.0470149
PHD finger TF	AT3G14980	OS04G0433900	21.7643	0.0249998	0.0557617
PRR3	AT5G60100	OS07G0695100	28.5714	0.0249998	0.0164619
PRR3	AT5G60100	OS07G0695100	28.5714	0.0249998	0.0897149
-	AT3G23760	OS07G0189800	41.1504	0.0249998	0.044565
-	AT3G56270	OS03G0339700	22.2426	0.0249998	0.16167
-	AT3G56270	OS07G0677900	23.8921	0.0249998	0.0496103
DNA binding	AT5G23480	OS01G0884500	14.1256	0.0250491	0.0855198
zinc finger	AT3G51390	OS04G0562000	40.3458	0.0250678	0.186852
-	AT1G79770	OS02G0229900	32.1053	0.0256275	0.103513
auxin efflux carrier	AT5G01990	OS05G0481900	59.4966	0.0256891	0.176543
auxin efflux carrier	AT5G01990	OS01G0818000	62.037	0.0256891	0.0162452
auxin efflux carrier	AT5G01990	OS01G0818000	62.037	0.0256891	0.0827547
auxin efflux carrier	AT5G01990	OS01G0818000	62.037	0.0256891	0.13555
calmodulin-binding	AT5G57580	OS02G0177800	59.9359	0.0256891	0.149223
NDB2	AT4G05020	OS08G0141400	32.493	0.0256891	0.0530621
UGT71C5	AT1G07240	OS07G0510500	36.0825	0.02569	0.138273
ferredoxin	AT4G14890	OS03G0659200	53.7415	0.0256998	0.0567319
ferredoxin	AT4G14890	OS03G0659200	53.7415	0.0256998	0.156549
glycoprotein	AT4G26750	OS06G0308800	44.877	0.0256998	0.103678
-	AT2G41810	OS03G0807700	52.9262	0.0256998	0.15825
U-box	AT5G67340	OS08G0110500	38.7136	0.0257057	0.0689271
HSFA7A	AT3G51910	OS07G0178600	37.3656	0.0257957	0.095479
HSFA7A	AT3G51910	OS10G0419300	39.9441	0.0257957	0.0424468
PUP11	AT1G44750	OS09G0548600	44.7977	0.0258333	0.0436697
PUP11	AT1G44750	OS02G0689200	56.8831	0.0258333	0.0108788
PUP11	AT1G44750	OS02G0689200	56.8831	0.0258333	0.0771518
-	AT4G14500	OS07G0185200	54.9367	0.0258432	0.139147
NAD+	AT5G40610	OS01G0971600	75.7835	0.025998	0.0581091
NAD+	AT5G40610	OS01G0971600	75.7835	0.025998	0.120397
-	AT3G11760	OS03G0649000	48.5969	0.025998	0.0256065
senescence/dehydration-associated	AT4G35985	OS06G0717100	47.2554	0.0260327	0.0920664
hydrolase	AT1G07230	OS03G0826600	69.5413	0.0260912	0.143854
kinase	AT5G56460	OS03G0159100	76.8617	0.0260912	0.13555
kinase	AT3G61080	OS03G0117800	69.0059	0.0262759	0.112773
MKK2	AT4G29810	OS06G0147800	64.4886	0.0263796	0.128296
DNA-binding	AT4G14465	OS07G0235200	51.3228	0.0264287	0.151115
ketose-bisphosphate aldolase class-II	AT1G18270	OS06G0258900	64.1715	0.0264856	0.069805
TMP-A	AT2G45960	OS02G0823100	76.0417	0.0264856	0.0151913
TMP-A	AT2G45960	OS04G0559700	80.5556	0.0264856	0.121164
mitochondrial substrate carrier	AT1G72820	OS09G0444700	61.6327	0.0266057	0.200772
PED1	AT2G33150	OS10G0457600	75.705	0.0268247	0.0752655
DIE2	AT5G02410	OS04G0503700	46.6801	0.0268294	0.0139272
DIE2	AT5G02410	OS04G0503700	46.6801	0.0268294	0.0965211
PUB9	AT3G07360	OS04G0348400	44.4444	0.026995	0.190914
zinc finger	AT5G20910	OS09G0434200	45.5357	0.0271527	0.0989099
ATSK42	AT1G57870	OS03G0841800	79.4811	0.0271917	0.0234006
-	AT1G27850	OS12G0239200	27.3649	0.0271917	0.021209
-	AT1G27850	OS12G0239000	27.7683	0.0271917	0.0111984
GLP5	AT1G09560	OS05G0277500	62.8959	0.0273803	0.170747
GLP5	AT1G09560	OS01G0249200	62.9956	0.0273803	0.0746632
-	AT3G17950	OS06G0256800	30.5164	0.0274787	0.134935
4-methyl-5(b-hydroxyethyl)-thiazole monophosphate biosynthesis	AT3G14990	OS01G0217500	47.0886	0.0274837	0.172913
4-methyl-5(b-hydroxyethyl)-thiazole monophosphate biosynthesis	AT3G14990	OS01G0217800	48.8318	0.0274837	0.0590669
-	AT5G24890	OS09G0499000	25.0965	0.027486	0.0788465
-	AT5G24890	OS08G0516900	26.0536	0.027486	0.139673
INT4	AT4G16480	OS04G0511400	64.3718	0.0275223	0.199244
WRKY8	AT5G46350	OS01G0626400	26.6491	0.027561	0.152204
-	AT3G19370	OS04G0505000	14.3808	0.0275878	0.0190397
-	AT3G19370	OS04G0649200	17.462	0.0275878	0.0120841
BGLU42	AT5G36890	OS01G0897600	64.1822	0.0276699	0.202955
hydrolase	AT5G02230	OS01G0973000	56.9395	0.0276699	0.0825378
hydrolase	AT5G02230	OS01G0973000	56.9395	0.0276699	0.102812
MPK4	AT4G01370	OS08G0157000	76.9036	0.0276994	0.145733
SnRK3.16	AT3G17510	OS01G0292200	57.0499	0.0277191	0.0570045
HVA22D	AT4G24960	OS08G0467500	46.9027	0.0277974	0.0812695
HVA22D	AT4G24960	OS08G0467500	46.9027	0.0277974	0.159308
-	AT3G07190	OS07G0291200	49.2857	0.0278799	0.00742267
-	AT3G07190	OS03G0848400	61.2903	0.0278799	0.0617468
bHLH	AT1G03040	OS03G0797600	52.0408	0.0278877	0.0238527
bHLH	AT1G03040	OS03G0797600	52.0408	0.0278877	0.0972604
kinase	AT4G21410	OS07G0537600	33.9734	0.0280441	0.0952209
kinase	AT4G21410	OS07G0538200	34.4778	0.0280441	0.134594
kinase	AT4G21410	OS07G0538700	34.6549	0.0280441	0.121693
kinase	AT4G21410	OS07G0537900	34.6608	0.0280441	0.141675
kinase	AT4G21410	OS07G0537900	34.6608	0.0280441	0.176083
kinase	AT4G21410	OS07G0541900	37.5951	0.0280441	0.0808673
kinase	AT4G21410	OS07G0540100	39.0805	0.0280441	0.0317915
kinase	AT4G21410	OS10G0326900	50.2809	0.0280441	0.178016
kinase	AT4G21410	OS07G0538400	50.2924	0.0280441	0.149759
THF1	AT2G20890	OS07G0558500	66.2021	0.0280441	0.0121657
THF1	AT2G20890	OS07G0558500	66.2021	0.0280441	0.032998
CCR2	AT1G80820	OS08G0277200	56.4327	0.0281539	0.0333772
CCR2	AT1G80820	OS08G0441500	61.2188	0.0281539	0.109384
CCR2	AT1G80820	OS08G0441500	61.2188	0.0281539	0.123949
germin-like	AT3G05950	OS08G0189200	58.2222	0.0282395	0.156308
SEU	AT1G43850	OS11G0207100	44.9089	0.0282445	0.102812
SEU	AT1G43850	OS11G0207000	45.5142	0.0282445	0.102812
protein binding	AT5G61240	OS03G0211900	72.2388	0.028257	0.00849475
proteasome	AT1G79210	OS03G0387100	89.7872	0.0283043	0.131531
proteasome	AT1G79210	OS02G0634900	90.2128	0.0283043	0.139436
TZ	AT5G54770	OS07G0529600	73.8028	0.028337	0.154165
signal peptidase subunit	AT5G27430	OS09G0556000	77.2455	0.0284123	0.182234
binding	AT5G49960	OS01G0870100	55.6477	0.0284464	0.101666
ribose-5-phosphate isomerase	AT2G01290	OS04G0306400	50.9091	0.0284464	0.199901
FPS1	AT5G47770	OS05G0543400	66.4789	0.0284635	0.144304
PPR	AT1G64100	OS04G0351333	15.6997	0.0284635	0.02155
PPR	AT1G64100	OS04G0351333	15.6997	0.0284635	0.130489
PPR	AT1G64100	OS04G0349600	19.8966	0.0284635	0.130489
PPR	AT1G64100	OS10G0497300	23.5516	0.0284635	0.0550624
PPR	AT1G64100	OS10G0497300	23.5516	0.0284635	0.120312
PPR	AT1G64100	OS08G0107800	25.3205	0.0284635	0.0824238
YLS9	AT2G35980	OS12G0159000	25.5208	0.0284635	0.0760275
YLS9	AT2G35980	OS01G0864300	30.2905	0.0284635	0.0403984
YLS9	AT2G35980	OS04G0685300	33.6585	0.0284635	0.185417
PLE2	AT3G25860	OS09G0408600	60.8782	0.0284733	0.172345
NCRK	AT2G28250	OS02G0110600	48.4694	0.0285498	0.127757
stearoyl-ACP desaturase	AT3G02630	OS02G0504800	60.559	0.0286603	0.109141
stearoyl-ACP desaturase	AT3G02630	OS02G0504800	60.559	0.0286603	0.193869
stearoyl-ACP desaturase	AT3G02630	OS01G0919900	72.75	0.0286603	0.138146
stearoyl-ACP desaturase	AT3G02630	OS04G0379900	75.1282	0.0286603	0.0234277
stearoyl-ACP desaturase	AT3G02630	OS04G0379900	75.1282	0.0286603	0.0476339
TF	AT2G43140	OS01G0900800	28.1654	0.0286657	0.0395966
C2	AT1G70790	OS07G0500300	42.7746	0.0287957	0.0457174
protein binding	AT4G08460	OS02G0566500	31.2155	0.0287957	0.093766
protein binding	AT4G08460	OS04G0448100	35.9551	0.0287957	0.203999
lipase	AT3G03240	OS01G0859200	42.6513	0.0288641	0.205396
CYP81D5	AT4G37320	OS03G0760200	42.3002	0.0290461	0.0407963
CYP81D5	AT4G37320	OS02G0503850	45.2381	0.0290461	0.162151
kinase	AT5G65600	OS12G0606000	20.9661	0.0293187	0.204709
kinase	AT5G65600	OS01G0779300	39.7989	0.0293187	0.12131
kinase	AT5G65600	OS08G0125200	41.9414	0.0293187	0.183199
PUX5	AT4G15410	OS04G0464500	52.4116	0.0293187	0.204496
SAUR_E	AT4G34750	OS04G0662400	24.8366	0.0293187	0.0919869
SAUR_E	AT4G34750	OS04G0662200	30.7692	0.0293187	0.0234006
FUC1	AT2G28100	OS04G0560400	55.0388	0.0293654	0.00676833
oxidoreductase	AT5G38900	OS03G0598900	49.4297	0.0294951	0.0364565
kinase	AT4G02410	OS04G0531500	47.1467	0.0295623	0.0501949
kinase	AT4G02410	OS03G0258000	49.8016	0.0295623	0.0124043
kinase	AT4G02410	OS03G0258000	49.8016	0.0295623	0.0832012
kinase	AT4G02410	OS04G0531400	51.5723	0.0295623	0.0147355
-	AT1G49890	OS10G0345600	30.7453	0.029713	0.156192
bHLH	AT3G47640	OS03G0379300	29.7619	0.0297406	0.0582719
kinase	AT1G16670	OS08G0200500	57.4526	0.0297982	0.179248
kinase	AT2G41820	OS07G0207100	53.6688	0.0298309	0.0985912
aldose 1-epimerase	AT3G47800	OS02G0575800	46.5608	0.0299011	0.0389265
PGDH	AT1G17745	OS08G0447000	69.7262	0.0302269	0.0443027
PGDH	AT1G17745	OS08G0447000	69.7262	0.0302269	0.0932989
chaperonin	AT3G13470	OS02G0102900	82.107	0.0302968	0.0571205
chaperonin	AT3G13470	OS06G0114000	85.1913	0.0302968	0.0160261
F-box	AT1G27340	OS01G0923900	53.9503	0.030315	0.185665
-	AT2G21640	OS10G0557800	29.1667	0.030529	0.105229
flavodoxin	AT1G75200	OS03G0775300	62.5	0.030545	0.0546564
flavodoxin	AT1G75200	OS03G0775300	62.5	0.030545	0.164892
UDP-glucose 6-dehydrogenase	AT5G15490	OS03G0757900	87.9167	0.0308101	0.0466647
KOR3	AT4G24260	OS03G0736300	67.2581	0.0308211	0.057119
ATH8	AT2G39190	OS02G0805800	40.999	0.0308269	0.0388944
ATH8	AT2G39190	OS02G0805800	40.999	0.0308269	0.145829
SCPL11	AT2G22970	OS10G0101200	36.4407	0.0308573	0.185533
SCPL11	AT2G22970	OS04G0176400	40.8994	0.0308573	0.107287
AGAL1	AT5G08380	OS07G0452100	57.7566	0.030961	0.17897
-	AT3G08890	OS03G0297000	65.8824	0.0309842	0.0525924
-	AT3G08890	OS01G0565800	68.8235	0.0309842	0.176223
-	AT3G08890	OS05G0346400	71.7647	0.0309842	0.169488
UGT73C7	AT3G53160	OS01G0176000	39.9598	0.0310124	0.0148832
kinase	AT5G03320	OS10G0442800	52.7115	0.0312025	0.0376289
SOUL-1	AT2G37970	OS01G0850900	64.8148	0.0313313	0.113118
RLP3	AT1G17250	OS06G0692100	24.3553	0.0314243	0.0533362
RLP3	AT1G17250	OS02G0155400	38.652	0.0314243	0.177111
RLP3	AT1G17250	OS02G0155600	39.3124	0.0314243	0.17293
-	AT2G42190	OS06G0320300	35.8621	0.0316835	0.0759622
TLP5	AT1G43640	OS08G0103300	58.98	0.0318477	0.0427021
DNA polymerase	AT1G14460	OS12G0209300	35.9348	0.0318611	0.191179
HAM1	AT4G13720	OS10G0457500	79.0244	0.0321891	0.16521
SEN1	AT3G45590	OS06G0530700	27.8146	0.0321891	0.028325
SEN1	AT3G45590	OS06G0530700	27.8146	0.0321891	0.0938926
SEN1	AT3G45590	OS11G0602400	29.7945	0.0321891	0.104462
SEN1	AT3G45590	OS11G0602400	29.7945	0.0321891	0.1394
AHA4	AT3G47950	OS07G0191200	87.1473	0.0323644	0.00573428
AHA4	AT3G47950	OS12G0638700	88.7029	0.0323644	0.026726
GRAM	AT5G13200	OS12G0478200	54.1096	0.032416	0.149895
GRAM	AT5G13200	OS12G0478200	54.1096	0.032416	0.155081
-	AT5G43830	OS03G0744600	57.7689	0.0324601	0.108243
ATP binding	AT1G06190	OS03G0183100	32.5333	0.0324611	0.124053
ATP binding	AT1G06190	OS03G0183100	32.5333	0.0324611	0.201169
ADR1-L3	AT5G47280	OS12G0586000	45.7571	0.0328658	0.124022
TF	AT4G00390	OS09G0451700	22.7778	0.0328763	0.0986121
protein binding	AT1G44910	OS01G0532200	54.3897	0.0331719	0.0676965
rcd1-like cell differentiation	AT3G20800	OS03G0784800	70	0.0331719	0.0935079
-	AT5G12170	OS01G0955700	50.7973	0.0331719	0.0311584
-	AT5G12170	OS01G0955700	50.7973	0.0331719	0.0543262
-	AT5G12170	OS01G0955700	50.7973	0.0331719	0.0812544
protein kinase C substrate, heavy chain	AT2G42390	OS01G0752400	33.8624	0.0331951	0.0475857
PAB5	AT1G71770	OS06G0589700	44.8622	0.0333797	0.143854
FH2	AT2G43800	OS01G0897700	50	0.0334744	0.0201633
phosphatidylinositol 3- and 4-kinase	AT2G03890	OS09G0474800	58.7879	0.0334744	0.113515
phosphatidylinositol 3- and 4-kinase	AT2G03890	OS04G0668700	61.157	0.0334744	0.118064
potassium transporter	AT1G60160	OS09G0376900	67.959	0.0334744	0.0379834
-	AT5G57345	OS06G0694800	51.3228	0.0334744	0.0372977
RNA-binding cp33	AT1G01080	OS08G0117100	36.0502	0.0337989	0.037589
-	AT2G32380	OS03G0646400	44.5783	0.0337989	0.0251711
-	AT2G32380	OS03G0646400	44.5783	0.0337989	0.0474396
-	AT2G32380	OS03G0646400	44.5783	0.0337989	0.0683183
-	AT2G32380	OS07G0458500	47.8788	0.0337989	0.0544208
ADT4	AT3G44720	OS04G0406600	63.5321	0.033836	0.163067
ADT4	AT3G44720	OS09G0566050	65.1106	0.033836	0.0612653
ADT4	AT3G44720	OS09G0566050	65.1106	0.033836	0.171207
ADT4	AT3G44720	OS09G0565700	65.8354	0.033836	0.0612653
ADT4	AT3G44720	OS09G0565700	65.8354	0.033836	0.171207
GLUR3	AT1G05200	OS07G0103100	51.9874	0.0341463	0.1564
GLUR3	AT1G05200	OS06G0680500	56.2921	0.0341463	0.095479
microsomal glutathione s-transferase	AT1G65820	OS03G0709000	56.7568	0.0341959	0.0202356
PA	AT1G63690	OS06G0730900	68.6347	0.0342829	0.0152413
PP2C	AT4G33920	OS12G0580900	63.0102	0.0342829	0.00848886
43012	AT3G20660	OS04G0631100	59.2233	0.0342829	0.161482
RPL10B	AT1G26910	OS11G0220800	82.1429	0.0343961	0.155081
RPL10B	AT1G26910	OS05G0169100	84.0183	0.0343961	0.138396
PTAC13	AT3G09210	OS03G0825500	40	0.0344185	0.101298
MPK16	AT5G19010	OS05G0143500	76.5683	0.0344587	0.0910569
MPK16	AT5G19010	OS11G0271100	80.3213	0.0344587	0.105494
glycine-rich	AT4G32920	OS01G0187400	60.0978	0.0345806	0.0133518
glycine-rich	AT4G32920	OS01G0187400	60.0978	0.0345806	0.084577
glycine-rich	AT4G32920	OS05G0185650	62.1849	0.0345806	0.159081
glycine-rich	AT4G37900	OS11G0621300	34.6237	0.0347114	0.124362
RING1B	AT1G03770	OS01G0796700	31.9018	0.0348282	0.02622
STL2P	AT2G01470	OS11G0610700	39.1089	0.0348282	0.203314
PP2C	AT5G53140	OS06G0526800	46.5909	0.034871	0.155133
LRR	AT4G26050	OS04G0605300	53.9773	0.0349096	0.0124043
-	AT1G27510	OS01G0107900	44.9761	0.0350531	0.0300205
-	AT1G27510	OS01G0107900	44.9761	0.0350531	0.0461997
-	AT2G40480	OS07G0677900	27.7457	0.0350531	0.0496103
-	AT2G40480	OS03G0339700	27.9412	0.0350531	0.16167
FAD-binding	AT5G44400	OS02G0235900	38.9771	0.0351902	0.0207655
FAD-binding	AT5G44400	OS06G0548800	40.8663	0.0351902	0.165181
FAD-binding	AT5G44400	OS06G0549300	42.2562	0.0351902	0.163094
FAD-binding	AT5G44400	OS06G0549300	42.2562	0.0351902	0.175322
zinc finger	AT3G57480	OS07G0569700	29.8969	0.0351902	0.172584
-	AT3G55070	OS05G0160100	62.8079	0.0352101	0.205252
MPK17	AT2G01450	OS06G0708000	57.931	0.0352709	0.0658231
MPK17	AT2G01450	OS01G0643800	64.2715	0.0352709	0.0470691
anac061	AT3G44350	OS12G0156100	33.2248	0.0352713	0.0877908
IQD28	AT1G14380	OS01G0716200	29.0941	0.0353782	0.0194613
IQD28	AT1G14380	OS05G0535900	29.9652	0.0353782	0.0605869
PLL4	AT2G28890	OS03G0821300	54.4601	0.0353894	0.100563
ribosome	AT2G28830	OS03G0275900	50	0.0353894	0.195729
ribosome	AT2G28830	OS12G0570000	59.1876	0.0353894	0.188979
PDV2	AT2G16070	OS07G0123300	45.3441	0.0355311	0.196857
-	AT5G55210	OS08G0338600	13.8075	0.0355327	0.00911394
BPM1	AT5G19000	OS07G0655300	67.5115	0.0355393	0.0592871
SCL21	AT2G04890	OS07G0583600	44.6691	0.0355393	0.0273652
CYP72A13	AT3G14660	OS01G0627500	9.36903	0.0356788	0.00191364
CYP72A13	AT3G14660	OS01G0627600	43.8554	0.0356788	0.005295
CYP72A13	AT3G14660	OS01G0627400	49.278	0.0356788	0.202291
CYP72A13	AT3G14660	OS01G0628700	49.3409	0.0356788	0.105163
CYP72A13	AT3G14660	OS01G0728300	49.5183	0.0356788	0.083566
CYP72A13	AT3G14660	OS05G0372300	49.9037	0.0356788	0.0294148
CYP72A13	AT3G14660	OS01G0627800	50.9363	0.0356788	0.00720461
LYM1	AT1G21880	OS09G0452200	44.6384	0.0357618	0.103978
LYM1	AT1G21880	OS02G0769200	49.2126	0.0357618	0.0937176
LYM1	AT1G21880	OS06G0208800	49.6933	0.0357618	0.0294395
gibberellin-regulated	AT2G14900	OS03G0760800	46.2366	0.0357689	0.0360955
integral membrane	AT4G16442	OS12G0514300	31.2102	0.0357795	0.00849475
integral membrane	AT4G16442	OS12G0514300	31.2102	0.0357795	0.0177695
integral membrane	AT4G16442	OS12G0514300	31.2102	0.0357795	0.0302681
integral membrane	AT4G16442	OS03G0196400	38.5321	0.0357795	0.12131
CSP41A	AT3G63140	OS07G0212200	63.0102	0.0359171	0.154893
binding	AT2G25570	OS02G0202600	62.4561	0.0360018	0.103594
NST-K1	AT4G39390	OS12G0154000	67.3653	0.0360018	0.189315
NST-K1	AT4G39390	OS12G0154600	73.2733	0.0360018	0.0238197
MIM	AT5G61460	OS09G0121050	42.0578	0.0360607	0.124022
GSTU15	AT1G59670	OS10G0481300	41.6667	0.0361647	0.12724
zinc finger	AT2G17730	OS07G0479100	40.5622	0.0361817	0.095931
zinc finger	AT2G17730	OS06G0717600	43.1034	0.0361817	0.131033
F-box	AT4G00755	OS03G0861800	35.0746	0.0361939	0.0919094
F-box	AT4G00755	OS03G0116800	39.899	0.0361939	0.0571188
dehydration-responsive	AT4G00750	OS02G0675700	59.2879	0.0363499	0.0660921
phosphatidylinositol 3- and 4-kinase	AT1G13640	OS09G0474800	55	0.0363499	0.113515
phosphatidylinositol 3- and 4-kinase	AT1G13640	OS04G0668700	59.3388	0.0363499	0.118064
MIPS1	AT4G39800	OS10G0369900	80.943	0.0364006	0.150219
TF	AT1G09250	OS03G0311600	39.5122	0.0364658	0.0592767
ATP binding	AT3G49790	OS07G0124000	28.9673	0.0365207	0.0564387
-	AT3G61690	OS03G0210800	23.0866	0.0365689	0.0946257
kinase	AT5G55560	OS07G0584100	61.1621	0.0366879	0.0383966
KAS III	AT1G62640	OS04G0643300	59.5588	0.0366967	0.0827069
ubiquitin-associated (UBA)/TS-N	AT1G04850	OS08G0526700	37.9487	0.0366967	0.116954
AKT1	AT2G26650	OS01G0648000	57.754	0.0367002	0.0856939
-	AT3G25130	OS11G0458100	18.9112	0.0367147	0.0818078
-	AT5G06830	OS06G0320100	56.9892	0.0367147	0.0389831
embryo-abundant	AT5G10830	OS01G0716500	45.6274	0.0368478	0.0102231
embryo-abundant	AT5G10830	OS01G0716500	45.6274	0.0368478	0.0118977
TF	AT5G13240	OS04G0662900	58.9286	0.0368478	0.145599
kinase	AT1G51860	OS09G0356800	35.8314	0.0369313	0.13204
kinase	AT1G51860	OS09G0355400	38.4876	0.0369313	0.157254
-	AT4G17486	OS03G0100900	48.1633	0.0369823	0.172832
-	AT4G17486	OS02G0655500	51.4706	0.0369823	0.205985
PRR2	AT4G13660	OS12G0263600	60	0.0370794	0.175917
PRR2	AT4G13660	OS12G0263800	65.3226	0.0370794	0.115312
PRR2	AT4G13660	OS12G0263800	65.3226	0.0370794	0.204891
xanthine/uracil permease	AT3G10960	OS05G0332600	68.523	0.0373949	0.0380118
-	AT3G57780	OS09G0487200	38.5897	0.0374206	0.0478594
-	AT3G57780	OS08G0505200	44.9782	0.0374206	0.142282
LRR	AT1G12970	OS02G0593600	42.3154	0.0374361	0.0736849
LRR	AT1G12970	OS04G0476700	54.6125	0.0374361	0.0600285
ankyrin repeat	AT3G24530	OS02G0266300	67.2165	0.0376867	0.111758
HCF152	AT3G09650	OS12G0102600	52.7977	0.0377726	0.0382978
HCF152	AT3G09650	OS12G0102600	52.7977	0.0377726	0.0638602
HPR	AT1G68010	OS02G0101500	84.9741	0.0378209	0.171094
stress-responsive	AT2G23680	OS03G0767800	38.0952	0.037838	0.0770115
RRM	AT3G51950	OS03G0329200	32.7917	0.0378475	0.161391
FSD3	AT5G23310	OS06G0143000	61.1765	0.0379094	0.0480005
PAZ	AT1G31290	OS04G0615700	39.7486	0.0379094	0.100545
NADP-ME2	AT5G11670	OS01G0188400	68.5446	0.0381583	0.0104605
NADP-ME2	AT5G11670	OS01G0723400	73.6487	0.0381583	0.0822205
-	AT5G17210	OS06G0114700	55.6098	0.0382184	0.126255
TET2	AT2G19580	OS06G0572400	55.8824	0.0382462	0.048161
U-box	AT5G09800	OS05G0439400	25.6637	0.0382942	0.0356989
zinc finger	AT5G57660	OS10G0560400	21.8855	0.0384505	0.0657781
zinc finger	AT5G57660	OS10G0560400	21.8855	0.0384505	0.204126
kinase	AT1G72540	OS03G0407900	41.2	0.03856	0.136606
kinase	AT1G72540	OS08G0457400	43.9331	0.03856	0.0414976
kinase	AT1G72540	OS10G0395000	53.4704	0.03856	0.0856939
kinase	AT1G72540	OS10G0395000	53.4704	0.03856	0.126393
TGA4	AT5G10030	OS04G0637000	50.8816	0.03856	0.105499
RRM	AT5G53680	OS02G0714000	21.2544	0.0386871	0.12797
GSTU10	AT1G74590	OS06G0227500	16.8224	0.0387633	0.0752052
protein binding	AT1G24440	OS01G0905700	45.6349	0.0388203	0.0261474
protein binding	AT1G24440	OS07G0275300	46.6403	0.0388203	0.142568
LIM	AT2G39900	OS03G0266100	71.9388	0.0389935	0.0642168
RIF10	AT3G03710	OS07G0168000	63.7472	0.0390912	0.18249
catalytic/ glucosylceramidase	AT4G10060	OS11G0242100	56.3158	0.0391245	0.175155
-	AT1G21010	OS09G0493000	5.47264	0.0392671	0.15796
-	AT1G21010	OS09G0492900	25.6831	0.0392671	0.11259
-	AT1G21010	OS02G0193300	28.125	0.0392671	0.111263
-	AT1G21010	OS02G0193300	28.125	0.0392671	0.19901
hydrolase	AT1G72700	OS06G0565900	74.0798	0.0394706	0.168626
ZIGA4	AT1G08680	OS03G0323500	34.4444	0.0394706	0.005295
PKT2	AT5G48880	OS10G0457600	65.2928	0.0396562	0.0752655
VQ motif	AT4G39720	OS08G0409500	18.5446	0.0397163	0.0536817
POP2	AT3G22200	OS08G0205900	72.3529	0.0397383	0.065336
ARF9	AT4G23980	OS01G0236300	43.3476	0.0399893	0.0559971
ARF9	AT4G23980	OS01G0236300	43.3476	0.0399893	0.102081
CYP81D1	AT3G28740	OS03G0760200	39.3762	0.0399978	0.0407963
CYP81D1	AT3G28740	OS02G0503850	44.6429	0.0399978	0.162151
MHX1	AT2G47600	OS02G0644900	57.2687	0.0399978	0.144691
MHX1	AT2G47600	OS11G0660000	66.5392	0.0399978	0.0941123
MHX1	AT2G47600	OS11G0660000	66.5392	0.0399978	0.144691
isoflavone reductase	AT4G39230	OS01G0237500	40.2062	0.0400794	0.162498
-	AT5G12420	OS05G0556300	31.6814	0.0400794	0.119675
-	AT4G38390	OS04G0563000	54.8913	0.0402586	0.0445049
-	AT4G38390	OS04G0563000	54.8913	0.0402586	0.0805769
hydrolase	AT4G19810	OS04G0376400	26.9311	0.040328	0.013632
hydrophobic	AT2G24040	OS09G0558100	50	0.0404951	0.0605287
zinc finger	AT5G03200	OS03G0254900	34.7193	0.0407813	0.146246
zinc finger	AT5G03200	OS10G0204100	41.6471	0.0407813	0.0111164
-	AT1G29820	OS01G0664100	57.8853	0.0408294	0.0995437
KCS11	AT2G26640	OS02G0205500	71.2909	0.0408367	0.102936
KCS11	AT2G26640	OS06G0598800	76.3006	0.0408367	0.032677
KCS11	AT2G26640	OS06G0598800	76.3006	0.0408367	0.0805404
ARA12	AT5G67360	OS03G0761500	62.6963	0.0409863	0.057119
YLS7	AT5G51640	OS01G0914800	52.1912	0.0410487	0.0999091
ATP binding	AT2G20050	OS02G0281000	61.8785	0.0412592	0.0133875
ATP binding	AT2G20050	OS02G0281000	61.8785	0.0412592	0.103526
ATP binding	AT2G20050	OS02G0281000	61.8785	0.0412592	0.199562
ENT1,AT	AT1G70330	OS08G0205200	68.4874	0.0413627	0.098783
scpl3	AT1G73280	OS10G0101200	40.0424	0.0415304	0.185533
scpl3	AT1G73280	OS04G0176400	42.1842	0.0415304	0.107287
SERK2	AT1G34210	OS06G0225300	59.7403	0.0416722	0.13455
SERK2	AT1G34210	OS08G0176200	79.6482	0.0416722	0.0305904
SERK2	AT1G34210	OS04G0457800	81.8471	0.0416722	0.104504
armadillo/beta-catenin repeat	AT2G05810	OS09G0135800	41.681	0.0416901	0.107718
armadillo/beta-catenin repeat	AT2G05810	OS09G0135800	41.681	0.0416901	0.16142
senescence-associated	AT5G49120	OS02G0592833	41.2698	0.0416901	0.100114
KCS12	AT2G28630	OS10G0472900	51.3979	0.0417781	0.0291324
transducin	AT1G80670	OS01G0635400	73.8372	0.0417781	0.00913663
TF	AT3G06590	OS03G0311600	41.4634	0.0417879	0.0592767
PU1	AT5G04360	OS04G0164900	65.4054	0.0419088	0.0369046
TPS4	AT4G27550	OS05G0518600	59.9138	0.0419088	0.0514263
TPS4	AT4G27550	OS05G0518600	59.9138	0.0419088	0.155019
VAMP728	AT3G24890	OS03G0165800	27.3543	0.0419622	0.0382978
kinase	AT4G09760	OS01G0183000	52.0436	0.0419969	0.0293059
kinase	AT4G09760	OS01G0183000	52.0436	0.0419969	0.070427
kinase	AT4G09760	OS01G0717000	55.9783	0.0419969	0.0868599
kinase	AT4G09760	OS01G0717000	55.9783	0.0419969	0.100545
EB1B	AT5G62500	OS04G0642100	60.9665	0.042032	0.0605234
zinc finger	AT5G50020	OS05G0436900	54.7786	0.042077	0.00982937
wound-responsive	AT4G10270	OS06G0683700	35.9223	0.0420997	0.200567
wound-responsive	AT4G10270	OS08G0178500	44.4444	0.0420997	0.0822205
wound-responsive	AT4G10270	OS04G0635100	58.1395	0.0420997	0.0125922
ERF1-1	AT5G47880	OS07G0587400	85.8124	0.0422746	0.0133449
kinase	AT1G51800	OS09G0356800	35.363	0.0422746	0.13204
kinase	AT1G51800	OS09G0355400	37.9233	0.0422746	0.157254
kinase	AT5G46080	OS08G0376600	33.0749	0.0424468	0.0234277
LNG2	AT3G02170	OS07G0109400	22.9568	0.0428108	0.116072
ZIFL1	AT5G13750	OS01G0279400	48.6922	0.04308	0.188369
ZIFL1	AT5G13750	OS11G0136400	49.0385	0.04308	0.168614
ZIFL1	AT5G13750	OS12G0133100	55.5777	0.04308	0.0632234
ZIFL1	AT5G13750	OS11G0135000	57.6596	0.04308	0.0606632
WRKY27	AT5G52830	OS02G0265200	30.1939	0.043626	0.114519
WRKY27	AT5G52830	OS02G0265200	30.1939	0.043626	0.18477
-	AT1G16000	OS08G0272000	60	0.0436381	0.0331393
GI	AT1G22770	OS01G0182600	68.4483	0.0440626	0.199244
KOR2	AT1G65610	OS04G0497200	57.6244	0.0440626	0.12436
NPG1	AT2G43040	OS12G0565300	61.2948	0.0440626	0.125224
pectinacetylesterase	AT4G19410	OS04G0602500	48.2833	0.0440656	0.127426
U-box	AT1G68940	OS02G0727300	35.3783	0.0440656	0.0443186
XTH27	AT2G01850	OS10G0117000	46.2687	0.0440656	0.111428
-	AT4G02880	OS05G0394900	16.3539	0.0441053	0.0538809
-	AT4G02880	OS10G0315400	40.3509	0.0441053	0.172345
calcium ion binding	AT3G25600	OS05G0577500	57.2254	0.0443176	0.00580646
hydrolase	AT5G56590	OS01G0739700	64.3002	0.0443176	0.204465
VTI13	AT3G29100	OS01G0560200	49.7738	0.0443972	0.178212
VTI13	AT3G29100	OS01G0707300	55.6561	0.0443972	0.119494
phagocytosis and cell motility ELMO1	AT3G03610	OS11G0129600	37.3057	0.0444994	0.0392277
phagocytosis and cell motility ELMO1	AT3G03610	OS12G0126200	50.625	0.0444994	0.0392277
AGD9	AT5G46750	OS03G0854100	58.9806	0.0446733	0.099899
AGD9	AT5G46750	OS10G0574800	60.4423	0.0446733	0.0443186
kinase	AT1G66880	OS01G0136400	38.6228	0.0447478	0.025574
-	AT3G58670	OS04G0151900	51.8939	0.0448951	0.0694622
IPP1	AT5G16440	OS05G0413400	67.2355	0.0450932	0.0183562
VAMP711	AT4G32150	OS06G0174400	72.8507	0.0451666	0.0360068
VAMP711	AT4G32150	OS06G0174400	72.8507	0.0451666	0.13039
kinase	AT4G29050	OS04G0531500	43.3424	0.0452869	0.0501949
kinase	AT4G29050	OS03G0258000	48.2143	0.0452869	0.0124043
kinase	AT4G29050	OS03G0258000	48.2143	0.0452869	0.0832012
kinase	AT4G29050	OS04G0531400	48.5849	0.0452869	0.0147355
SQD2	AT5G01220	OS07G0100300	68.6848	0.0452869	0.1899
SQD2	AT5G01220	OS01G0142300	72.0183	0.0452869	0.0110754
chr31	AT1G05490	OS02G0650800	37.0331	0.0452912	0.0969919
chr31	AT1G05490	OS05G0392400	48	0.0452912	0.0505085
glycoprotein	AT2G39050	OS12G0184033	23.7705	0.0452912	0.105097
glycoprotein	AT2G39050	OS01G0104400	45.8955	0.0452912	0.0312491
glycoprotein	AT2G39050	OS01G0104400	45.8955	0.0452912	0.0315536
PUB17	AT1G29340	OS02G0234300	47.6764	0.0452912	0.117653
-	AT1G68650	OS08G0433100	68.4729	0.0452912	0.185048
-	AT1G07060	OS12G0106100	26.3158	0.0453135	0.136393
-	AT1G07060	OS11G0106800	29.4118	0.0453135	0.136393
protein binding	AT4G18670	OS01G0180000	54.2308	0.0453893	0.0859698
protein binding	AT4G18670	OS01G0180000	54.2308	0.0453893	0.0906075
CRS1	AT5G16180	OS08G0360100	40.8276	0.045445	0.126301
zinc finger	AT3G43430	OS08G0157400	22.7273	0.0456626	0.0885837
zinc finger	AT3G43430	OS02G0682300	24.3902	0.0456626	0.0888314
CEL1	AT1G70710	OS02G0733300	70.2756	0.0457748	0.0307931
CEL1	AT1G70710	OS06G0256900	70.6237	0.0457748	0.0833542
-	AT3G61380	OS04G0559200	16.2037	0.0457748	0.0443186
-	AT3G61380	OS10G0550000	16.4262	0.0457748	0.0194848
agenet	AT5G52070	OS05G0140600	26.6667	0.046142	0.0142922
HSP17.6C-CI	AT1G53540	OS03G0266300	69.5652	0.0463804	0.0219958
HSP17.6C-CI	AT1G53540	OS03G0267000	69.5652	0.0463804	0.0800834
HSP17.6C-CI	AT1G53540	OS03G0267000	69.5652	0.0463804	0.12092
HSP17.6C-CI	AT1G53540	OS03G0266900	73.3766	0.0463804	0.112644
protease	AT1G25510	OS01G0140100	52.5794	0.0464918	0.0201965
-	AT2G42950	OS01G0664100	51.9713	0.0464918	0.0995437
ethylene-responsive	AT2G31730	OS04G0493100	42.9487	0.0465331	0.0425684
AHA11	AT5G62670	OS07G0191200	87.2518	0.0465803	0.00573428
AHA11	AT5G62670	OS12G0638700	89.5397	0.0465803	0.026726
galactosyltransferase	AT1G27120	OS12G0265400	46.0251	0.0465803	0.0932765
galactosyltransferase	AT1G27120	OS07G0195200	55.6561	0.0465803	0.069003
integral membrane	AT2G35760	OS12G0514300	35.6688	0.0465908	0.00849475
integral membrane	AT2G35760	OS12G0514300	35.6688	0.0465908	0.0177695
integral membrane	AT2G35760	OS12G0514300	35.6688	0.0465908	0.0302681
integral membrane	AT2G35760	OS03G0196400	43.578	0.0465908	0.12131
kinase	AT5G58520	OS03G0295600	54.0541	0.0466561	0.180352
zinc finger	AT3G02790	OS06G0708600	64.9123	0.0467738	0.137946
ATP-binding region, ATPase-like	AT4G36290	OS10G0181700	50.4105	0.046823	0.0371787
amino acid permease	AT5G01240	OS01G0856500	82.1138	0.0468423	0.0825378
chloroplast inner membrane import Tic22	AT4G33350	OS06G0213200	58.6207	0.0468423	0.182234
AAE15	AT4G14070	OS03G0845500	58.9333	0.0470305	0.0447406
DiT2.2	AT5G64280	OS08G0481800	67.364	0.0470305	0.125641
DiT2.2	AT5G64280	OS09G0470000	71.2871	0.0470305	0.140944
germin-like	AT1G18980	OS03G0804500	45.9227	0.0470305	0.0650479
lipase	AT1G56670	OS01G0329900	40.367	0.0470305	0.0588558
PAS3	AT1G36160	OS05G0295300	12.4324	0.0470743	0.0998099
PAS3	AT1G36160	OS10G0363300	16.3934	0.0470743	0.167907
SGP2	AT3G21700	OS07G0522900	64.2857	0.04718	0.0737644
UDP-glucose 6-dehydrogenase	AT5G39320	OS03G0757900	86.6667	0.0476905	0.0466647
-	AT2G36680	OS03G0186800	54.5064	0.0477297	0.159206
SCABP5	AT4G17615	OS10G0564800	77.4648	0.0477868	0.023885
PMEPCRF	AT5G53370	OS02G0288100	49.4585	0.047814	0.11895
catalytic/ transferase	AT2G30200	OS03G0297400	72.8682	0.0479477	0.0832688
RAD23-3	AT3G02540	OS09G0407200	55.8673	0.0479477	0.175884
RAD23-3	AT3G02540	OS08G0430200	56.1576	0.0479477	0.00907143
CHLM	AT4G25080	OS06G0132400	66.9725	0.0480431	0.124053
UPS5	AT1G26440	OS12G0502800	59.6811	0.0480522	0.0806028
-	AT4G26550	OS06G0300300	69.2982	0.0481647	0.0952209
PUP5	AT2G24220	OS09G0557500	57.732	0.0482384	0.016773
kinase	AT5G61450	OS07G0466200	53.4694	0.0483766	0.168347
-	AT1G70400	OS07G0141600	28.0992	0.0485585	0.0981721
-	AT1G70400	OS04G0555400	28.5124	0.0485585	0.0714402
-	AT1G65020	OS10G0577000	48.4756	0.0485982	0.0252425
UGT76C1	AT5G05870	OS03G0824600	28.9528	0.0488656	0.0997977
UGT76C1	AT5G05870	OS11G0441500	36.5385	0.0488656	0.0645999
UGT76C1	AT5G05870	OS07G0240600	37.3418	0.0488656	0.197781
UGT76C1	AT5G05870	OS07G0241800	37.7729	0.0488656	0.0289144
UGT76C1	AT5G05870	OS07G0241800	37.7729	0.0488656	0.036019
UGT76C1	AT5G05870	OS07G0241500	38.8773	0.0488656	0.129458
GID1A	AT3G05120	OS05G0407500	60.7345	0.0489429	0.127927
invertase	AT3G06500	OS03G0314800	62.8981	0.0489558	0.123993
zinc finger	AT5G20885	OS08G0157400	24.4318	0.0492605	0.0885837
zinc finger	AT5G20885	OS02G0682300	26.2195	0.0492605	0.0888314
binding	AT1G50450	OS11G0140700	61.6438	0.0494268	0.0268137
binding	AT1G50450	OS11G0140700	61.6438	0.0494268	0.162092
binding	AT1G50450	OS12G0137200	67.6815	0.0494268	0.101699
binding	AT1G50450	OS12G0137200	67.6815	0.0494268	0.162092
DNAJ	AT3G13310	OS06G0716100	32.3308	0.0494523	0.117927
-	AT5G59770	OS05G0460800	52.5114	0.0494523	0.097021
HGL1	AT3G23640	OS07G0420700	64.2718	0.0495244	0.09913
SIP1b	AT5G18290	OS01G0182200	46.3415	0.0495244	0.0595504
PNC1	AT3G05290	OS05G0392700	65.7576	0.0499026	0.0179736
LIM	AT3G55770	OS03G0266100	74.4898	0.0501193	0.0642168
-	AT1G61240	OS07G0564800	50.7692	0.0503105	0.0312698
transferase, transferring glycosyl groups	AT4G14100	OS07G0189800	41.5929	0.0503289	0.044565
PR-1-LIKE	AT2G19990	OS02G0787000	30.3371	0.05056	0.202379
APX4	AT4G09010	OS04G0602100	62.0397	0.0507118	0.0238197
CHX14	AT1G06970	OS11G0109400	30.2122	0.0507255	0.101211
SnRK3.21	AT1G48260	OS01G0292200	55.0976	0.0509619	0.0570045
-	AT1G03730	OS12G0295600	37.8109	0.0511685	0.0485025
CYP91A2	AT4G37430	OS03G0760200	39.5712	0.051391	0.0407963
CYP91A2	AT4G37430	OS02G0503850	39.881	0.051391	0.162151
PNC2	AT5G27520	OS05G0392700	65.7576	0.0514039	0.0179736
MKK3	AT5G40440	OS06G0473200	69.8592	0.0514581	0.155639
-	AT5G67370	OS03G0439700	62.1795	0.051474	0.172887
-	AT5G44650	OS01G0798500	41.4384	0.0515297	0.0465663
RNA-binding	AT4G03110	OS05G0373400	56.867	0.0515875	0.13094
RNA-binding	AT4G03110	OS01G0938200	58.2609	0.0515875	0.122755
SNRK2-9	AT2G23030	OS05G0433100	46.748	0.0516472	0.149245
SNRK2-9	AT2G23030	OS01G0869900	54.3689	0.0516472	0.0329356
SNRK2-9	AT2G23030	OS02G0551100	66.0274	0.0516472	0.0384864
SNRK2-9	AT2G23030	OS04G0432000	67.1309	0.0516472	0.0207655
TTL1	AT1G53300	OS05G0587300	44.5045	0.0516472	0.0478723
TTL1	AT1G53300	OS05G0210600	48.8778	0.0516472	0.0632234
-	AT4G01960	OS01G0299500	27.1186	0.052016	0.189155
lipase	AT1G49740	OS08G0103500	48.1752	0.0521183	0.177225
SAI1	AT1G64280	OS01G0194300	42.7835	0.0521741	0.0427021
CSK	AT1G67840	OS12G0292900	41.4286	0.0522148	0.00642078
CSK	AT1G67840	OS12G0292900	41.4286	0.0522148	0.0592871
SDR	AT5G04900	OS03G0654600	67.3469	0.0522148	0.043707
SDR	AT5G04900	OS03G0654600	67.3469	0.0522148	0.118024
-	AT2G22660	OS11G0621300	36.0215	0.0522312	0.124362
pectinase	AT3G59850	OS01G0891100	45.6954	0.0522659	0.149896
pectinase	AT3G59850	OS01G0891100	45.6954	0.0522659	0.195573
pectinase	AT3G59850	OS11G0249600	59.596	0.0522659	0.110765
glycoprotein	AT5G05460	OS05G0346500	46.077	0.052423	0.0560355
CYP71A12	AT2G30750	OS05G0361000	34.5521	0.0524404	0.0659307
CYP71A12	AT2G30750	OS05G0361000	34.5521	0.0524404	0.164837
CYP71A12	AT2G30750	OS01G0227500	35.8289	0.0524404	0.178241
CYP71A12	AT2G30750	OS01G0227800	36.1111	0.0524404	0.197942
ELF4	AT2G40080	OS08G0366200	27.7778	0.0525193	0.0683359
URH2	AT1G05620	OS03G0425200	71.118	0.0525462	0.086443
proline-rich	AT5G07020	OS02G0556800	35.6846	0.0527483	0.0457376
-	AT2G35880	OS11G0571900	27.4419	0.052869	0.0556403
DPE2	AT2G40840	OS07G0662900	67.759	0.05291	0.0232089
ERD1	AT5G51070	OS02G0526400	63.382	0.0530255	0.147742
PAL4	AT3G10340	OS12G0520200	67.0588	0.0533637	0.197742
PAL4	AT3G10340	OS04G0518100	71.0042	0.0533637	0.00495756
PAL4	AT3G10340	OS02G0626400	73.9554	0.0533637	0.0157896
PAL4	AT3G10340	OS02G0626400	73.9554	0.0533637	0.024379
PAL4	AT3G10340	OS02G0626400	73.9554	0.0533637	0.0370635
PAL4	AT3G10340	OS02G0627100	74.3338	0.0533637	0.14461
PAL4	AT3G10340	OS04G0518400	74.5098	0.0533637	0.185665
5'-AMP-activated kinase beta-2 subunit	AT5G21170	OS07G0687300	37.6582	0.0534618	0.0285782
5'-AMP-activated kinase beta-2 subunit	AT5G21170	OS05G0491200	47.2414	0.0534618	0.0222019
5'-AMP-activated kinase beta-2 subunit	AT5G21170	OS03G0319100	49.8305	0.0534618	0.0717127
scpl46	AT2G33530	OS11G0522900	66.5254	0.0534618	0.0144846
scpl46	AT2G33530	OS04G0396800	66.8085	0.0534618	0.0128853
anac046	AT3G04060	OS11G0127600	34.2618	0.0534966	0.0800272
anac046	AT3G04060	OS03G0327100	40.7821	0.0534966	0.0464642
SDF2	AT2G25110	OS08G0278900	68.6636	0.0538596	0.148479
kinase	AT5G35580	OS08G0457400	45.3975	0.0538749	0.0414976
kinase	AT5G35580	OS03G0407900	45.4	0.0538749	0.136606
kinase	AT5G35580	OS10G0395000	56.0411	0.0538749	0.0856939
kinase	AT5G35580	OS10G0395000	56.0411	0.0538749	0.126393
proteasome	AT3G15180	OS05G0557200	41.4449	0.0538984	0.0312006
RSH2	AT3G14050	OS08G0457600	55.571	0.0538984	0.131793
phosphatase	AT4G18140	OS01G0665300	33.0296	0.0546648	0.00917259
phosphatase	AT4G18140	OS01G0665300	33.0296	0.0546648	0.159459
phosphatase	AT4G18140	OS01G0629400	59.887	0.0546648	0.0417734
IQD30	AT1G18840	OS01G0716200	29.9652	0.0547718	0.0194613
IQD30	AT1G18840	OS05G0535900	31.5331	0.0547718	0.0605869
oxidoreductase	AT5G16960	OS12G0225900	56.5217	0.0547917	0.088397
kinase	AT2G39110	OS10G0442800	49.8915	0.0549452	0.0376289
zinc finger	AT5G22920	OS10G0456800	66.5414	0.0549667	0.0148832
zinc finger	AT5G22920	OS10G0456800	66.5414	0.0549667	0.0333996
DNA binding	AT3G60320	OS02G0654600	38.0234	0.0552475	0.0710177
hydrolase	AT1G80280	OS01G0647700	55.5385	0.0553333	0.166058
ribose 5-phosphate isomerase	AT5G44520	OS03G0781400	45.1505	0.0553333	0.0564387
chaperonin	AT5G55200	OS08G0338700	44.0514	0.0553379	0.168723
chaperonin	AT5G55200	OS09G0284400	44.702	0.0553379	0.171655
SND3	AT1G28470	OS01G0672100	31.3492	0.0553592	0.0125922
KU70	AT1G16970	OS07G0184900	61.0577	0.0554959	0.0131188
KU70	AT1G16970	OS07G0184900	61.0577	0.0554959	0.0360825
embryo-abundant	AT1G55450	OS01G0716500	42.9658	0.0555262	0.0102231
embryo-abundant	AT1G55450	OS01G0716500	42.9658	0.0555262	0.0118977
senescence-associated	AT2G44670	OS04G0585700	26	0.0555598	0.0686917
senescence-associated	AT2G44670	OS04G0586000	26.7717	0.0555598	0.00200559
senescence-associated	AT2G44670	OS02G0687200	31.1321	0.0555598	0.157254
senescence-associated	AT2G44670	OS04G0586100	32.9897	0.0555598	0.0424689
3'(2'),5'-bisphosphate nucleotidase	AT5G63990	OS12G0183300	52	0.0555885	0.0972604
SEC14 cytosolic factor	AT1G22180	OS02G0752000	46.5608	0.0556163	0.201483
HKL1	AT1G50460	OS01G0940100	61.3445	0.0556494	0.0306541
HKL1	AT1G50460	OS01G0940100	61.3445	0.0556494	0.0508613
zinc finger	AT5G41400	OS02G0681200	30.6604	0.0556494	0.0157896
LAF3 ISF2	AT3G55850	OS01G0952700	59.8246	0.0558074	0.12304
FBL6	AT2G25490	OS02G0200900	42.7273	0.0558478	0.170008
FBL6	AT2G25490	OS06G0605900	42.9027	0.0558478	0.0407148
RSW2	AT5G49720	OS03G0736300	73.5484	0.0558995	0.057119
-	AT2G38370	OS07G0677900	33.3333	0.0558995	0.0496103
-	AT2G38370	OS03G0339700	35.4779	0.0558995	0.16167
-	AT4G27390	OS05G0502500	40.1709	0.0559087	0.0479694
-	AT3G09405	OS01G0974500	47.4419	0.056068	0.0231435
-	AT3G09405	OS05G0111900	47.7833	0.056068	0.176333
SAT1	AT3G51970	OS02G0468100	25.1968	0.0561159	0.128262
SAT1	AT3G51970	OS07G0540000	33.3333	0.0561159	0.059576
SAT1	AT3G51970	OS04G0277400	33.4302	0.0561159	0.0476631
splicing factor PWI	AT2G29210	OS03G0270200	37.619	0.0563484	0.166206
-	AT2G32580	OS03G0777500	48.6339	0.0563484	0.0948036
protease	AT1G64010	OS11G0239400	10.6838	0.0566306	0.13621
-	AT5G20580	OS02G0778300	59.2697	0.0566306	0.0456478
-	AT5G20580	OS02G0778300	59.2697	0.0566306	0.0729801
HIPL2	AT5G62630	OS07G0193000	48.7069	0.0566374	0.142778
HIPL2	AT5G62630	OS03G0691800	52.4355	0.0566374	0.106955
HIPL2	AT5G62630	OS12G0639600	53.8905	0.0566374	0.0533233
HIPL2	AT5G62630	OS12G0639600	53.8905	0.0566374	0.0680505
kinase	AT1G63430	OS04G0683600	44.6301	0.0566374	0.0465663
kinase	AT1G63430	OS04G0683600	44.6301	0.0566374	0.0674052
transferase	AT1G62730	OS06G0104100	63.5762	0.0566374	0.0750237
ALDH4	AT1G44170	OS12G0178000	64.3052	0.0566695	0.174428
zinc finger	AT5G25560	OS01G0719100	56.2914	0.0566695	0.0228826
zinc finger	AT5G25560	OS01G0719100	56.2914	0.0566695	0.0500588
zinc finger	AT5G25560	OS01G0719100	56.2914	0.0566695	0.0629034
zinc finger	AT5G25560	OS01G0719100	56.2914	0.0566695	0.13344
-	AT2G27285	OS04G0440000	41.6413	0.0568301	0.0555576
tolB	AT4G01870	OS07G0638100	52.352	0.0570409	0.203978
RHA1	AT5G45710	OS05G0530400	30.2832	0.0570983	0.0335725
RHA1	AT5G45710	OS01G0749300	37.2727	0.0570983	0.098638
TRP2	AT3G46590	OS02G0817800	18.0055	0.0571723	0.102812
CCCH-type	AT5G63260	OS12G0278800	24.7637	0.0572873	0.0578933
CHY2	AT5G52570	OS10G0533500	59.2466	0.057398	0.147063
CHY2	AT5G52570	OS03G0125100	63.8596	0.057398	0.144765
jmjC	AT3G20810	OS09G0489200	56.068	0.0574861	0.0723828
STF1	AT5G51820	OS10G0189100	77.6683	0.0574861	0.11337
XND1	AT5G64530	OS02G0555300	51.4706	0.0576746	0.035613
dehydration-responsive	AT1G29470	OS11G0186300	48.9043	0.0577986	0.0571581
dehydration-responsive	AT1G29470	OS01G0883900	56.6998	0.0577986	0.198389
dehydration-responsive	AT1G29470	OS04G0692400	59.675	0.0577986	0.0187911
beige/BEACH	AT3G60920	OS04G0555500	7.75681	0.0579381	0.103519
RABG3d	AT1G52280	OS01G0227300	89.372	0.0582327	0.0144339
hydrolase	AT4G38220	OS08G0511900	67.2783	0.0582578	0.0311646
catalytic	AT1G74790	OS07G0193000	51.2931	0.0583586	0.142778
catalytic	AT1G74790	OS12G0639600	56.0519	0.0583586	0.0533233
catalytic	AT1G74790	OS12G0639600	56.0519	0.0583586	0.0680505
catalytic	AT1G74790	OS03G0691800	56.7335	0.0583586	0.106955
-	AT4G17870	OS10G0573400	50.9434	0.0584164	0.154592
transducin	AT4G02730	OS07G0572000	57.9882	0.0585557	0.0149309
kinase	AT2G16790	OS06G0114650	45.9184	0.0586357	0.0360348
kinase	AT2G16790	OS06G0114650	45.9184	0.0586357	0.0419668
kinase	AT2G16790	OS06G0114650	45.9184	0.0586357	0.0494424
kinase	AT2G16790	OS06G0114650	45.9184	0.0586357	0.052975
KH	AT4G26480	OS02G0722700	70.979	0.0586615	0.117653
-	AT1G74440	OS08G0433600	44.5	0.0586615	0.102588
-	AT1G74440	OS02G0578800	58.2888	0.0586615	0.0382936
NIF	AT5G46410	OS01G0665300	33.4852	0.0587645	0.00917259
NIF	AT5G46410	OS01G0665300	33.4852	0.0587645	0.159459
NIF	AT5G46410	OS01G0629400	60.452	0.0587645	0.0417734
-	AT4G34090	OS03G0109700	57.1014	0.0587645	0.141578
peptidoglycan-binding LysM	AT1G77630	OS09G0452200	43.3915	0.0587647	0.103978
peptidoglycan-binding LysM	AT1G77630	OS06G0208800	44.7853	0.0587647	0.0294395
peptidoglycan-binding LysM	AT1G77630	OS02G0769200	45.2756	0.0587647	0.0937176
SPL6	AT1G69170	OS01G0922600	23.7942	0.0587804	0.162285
C2	AT1G63220	OS02G0640000	62.2378	0.0590298	0.0273652
C2	AT1G63220	OS04G0531100	62.5	0.0590298	0.044355
translation release factor	AT1G62850	OS03G0249200	62.1145	0.0592861	0.120169
glycosyl transferase 17	AT1G12990	OS02G0594900	69.821	0.0593066	0.204373
calmodulin binding	AT1G73805	OS09G0309200	32.1101	0.0595498	0.156845
ARK3	AT4G21380	OS07G0550500	47.8375	0.0598506	0.0180601
ARK3	AT4G21380	OS07G0550500	47.8375	0.0598506	0.0283212
ARK3	AT4G21380	OS05G0501400	48.2676	0.0598506	0.117428
RLK	AT2G37710	OS04G0531500	51.3587	0.0599761	0.0501949
RLK	AT2G37710	OS03G0258000	54.1667	0.0599761	0.0124043
RLK	AT2G37710	OS03G0258000	54.1667	0.0599761	0.0832012
RLK	AT2G37710	OS04G0531400	55.8176	0.0599761	0.0147355
ZFP4	AT1G66140	OS03G0239300	34.5833	0.0601953	0.11548
MSP1	AT4G27680	OS06G0714500	73.028	0.0602052	0.0184923
TMP-B	AT1G01620	OS02G0823100	83.3333	0.060277	0.0151913
TMP-B	AT1G01620	OS04G0559700	88.1944	0.060277	0.121164
DNAJ	AT4G39150	OS05G0543700	64.7929	0.0603129	0.0438064
DNAJ	AT4G39150	OS05G0543700	64.7929	0.0603129	0.105239
ATG7	AT5G45900	OS01G0614900	34.8369	0.0608161	0.141435
PP2C	AT4G33500	OS10G0370000	30.3226	0.0609558	0.138331
WRKY33	AT2G38470	OS05G0343400	44.9692	0.0610548	0.0494244
ATP binding	AT5G06670	OS02G0775400	65.9963	0.0611523	0.0728008
ATP binding	AT5G06670	OS06G0206700	73.913	0.0611523	0.180692
ETR2	AT3G23150	OS07G0259100	37.9665	0.0611523	0.0481298
POM1	AT1G05850	OS09G0494200	63.4969	0.0613166	0.0451564
hydrolase	AT3G04010	OS03G0656800	58.7398	0.0613254	0.201994
sorbitol dehydrogenase	AT5G51970	OS08G0545200	77.5068	0.061384	0.132166
-	AT4G17140	OS10G0565300	56.8627	0.0614007	0.0936233
AP19	AT2G17380	OS03G0783700	88.8199	0.0614406	0.0841496
GGT2	AT4G39650	OS04G0457500	62.0209	0.0614714	0.12227
extensin	AT3G22800	OS03G0795300	49.3639	0.0615201	0.151241
Rab GTPase activator	AT3G06540	OS01G0269100	46.4396	0.0618032	0.175925
-	AT1G27690	OS12G0581300	51.2658	0.0618178	0.204728
PHB2	AT1G03860	OS07G0262200	75.7785	0.0618434	0.0239401
nodulin MtN21	AT1G44800	OS02G0768300	45.5729	0.0621115	0.158534
HSP17.6II	AT5G12020	OS02G0217900	46.2857	0.0622121	0.176379
HSP17.6II	AT5G12020	OS01G0184100	60.241	0.0622121	0.11789
proton extrusion	AT4G31040	OS08G0224300	53.3958	0.0622704	0.172012
PYD2	AT5G12200	OS01G0807900	73.6549	0.0622704	0.151906
PYD2	AT5G12200	OS01G0807900	73.6549	0.0622704	0.15851
YUCCA5	AT5G43890	OS04G0128900	64.9165	0.0622704	0.169488
protein transport	AT5G52280	OS10G0504600	21.9858	0.0624312	0.145495
FIP1[V]	AT5G58040	OS03G0725100	24.8109	0.0624454	0.0745386
lipase	AT5G55050	OS03G0580800	34.3008	0.062467	0.171581
plastocyanin-like	AT3G01070	OS07G0112700	26.4045	0.0626676	0.128018
plastocyanin-like	AT3G01070	OS03G0758500	32.1212	0.0626676	0.153643
plastocyanin-like	AT3G01070	OS03G0758500	32.1212	0.0626676	0.160524
UBP17	AT5G65450	OS08G0478500	30.6748	0.0630023	0.123873
FIM2	AT5G35700	OS02G0588300	64.3388	0.0630475	0.0170555
kinase	AT2G31880	OS06G0288100	44.5972	0.063123	0.141679
GNAT	AT2G39000	OS02G0806000	52.7675	0.0631311	0.059532
ZML2	AT1G51600	OS02G0148500	36.5854	0.0631781	0.024379
-	AT1G45150	OS07G0581300	64.4377	0.0631824	0.0700948
-	AT4G22270	OS02G0566400	36.971	0.0631824	0.0180601
RPL10C	AT1G66580	OS11G0220800	81.6964	0.0631978	0.155081
RPL10C	AT1G66580	OS05G0169100	84.0183	0.0631978	0.138396
GNAT	AT1G72030	OS07G0264800	42.517	0.0633993	0.186754
RCC1	AT3G15430	OS07G0459400	61.3636	0.0636952	0.204811
GRF5	AT5G16050	OS11G0546900	79.2453	0.0638848	0.0984468
ICDH	AT1G54340	OS01G0248400	80.6763	0.0640402	0.121421
KRP5	AT3G24810	OS10G0471700	31.9588	0.0640889	0.019686
BAM1	AT5G65700	OS07G0134200	68.5239	0.0641209	0.0437281
-	AT5G65180	OS04G0636700	38.8258	0.0641209	0.0851013
ATSS3	AT1G11720	OS04G0624600	51.6447	0.0642976	0.00456826
CYCD6;1	AT4G03270	OS07G0556000	30.625	0.0643481	0.0796799
RALFL22	AT3G05490	OS05G0203000	31.3869	0.0643481	0.103887
RALFL22	AT3G05490	OS02G0670500	37.8151	0.0643481	0.00494292
RALFL22	AT3G05490	OS01G0358100	38.7931	0.0643481	0.0427021
RALFL22	AT3G05490	OS01G0357900	39.3162	0.0643481	0.0244306
RALFL22	AT3G05490	OS11G0456000	39.4231	0.0643481	0.108435
RALFL22	AT3G05490	OS01G0257100	39.6947	0.0643481	0.100428
zinc finger	AT2G42350	OS12G0108350	7.10059	0.0644005	0.0993894
zinc finger	AT2G42350	OS01G0755700	21.8487	0.0644005	0.0938508
BKI1	AT5G42750	OS08G0474500	27.9352	0.0645645	0.0158825
SRF7	AT3G14350	OS03G0397700	44.2085	0.0645645	0.0157896
SRF7	AT3G14350	OS03G0397700	44.2085	0.0645645	0.20558
SRF7	AT3G14350	OS07G0618400	53.8251	0.0645645	0.0262235
SRF7	AT3G14350	OS03G0183800	60.0279	0.0645645	0.0809701
nuclease	AT2G26970	OS02G0465500	53.8462	0.0646828	0.0721273
ribosome	AT3G01170	OS05G0488500	34.8548	0.0649831	0.144765
CC-NBS-LRR	AT3G50950	OS11G0479100	20.6673	0.0649848	0.160007
CC-NBS-LRR	AT3G50950	OS12G0199100	23.2967	0.0649848	0.0241208
CC-NBS-LRR	AT3G50950	OS10G0394400	25.2983	0.0649848	0.00522507
CC-NBS-LRR	AT3G50950	OS10G0394400	25.2983	0.0649848	0.0694622
CC-NBS-LRR	AT3G50950	OS10G0394400	25.2983	0.0649848	0.126646
CC-NBS-LRR	AT3G50950	OS10G0394400	25.2983	0.0649848	0.145518
MATE efflux	AT2G38330	OS12G0106600	52.7273	0.0650479	0.153322
cobalt ion transmembrane transporter	AT3G21580	OS05G0400600	54.1237	0.0650501	0.0616979
kinase	AT5G62710	OS12G0638100	60.5096	0.0650501	0.085057
-	AT5G66810	OS10G0382300	53.5714	0.0650501	0.101671
CCCH-type	AT2G02160	OS02G0831100	20.8226	0.0651043	0.140248
CCCH-type	AT2G02160	OS04G0671800	25.5977	0.0651043	0.041453
MAG	AT3G12040	OS02G0774500	58.7413	0.0651043	0.0856562
oxidoreductase	AT1G12550	OS04G0106400	51.6717	0.0651043	0.0109691
oxidoreductase	AT1G12550	OS04G0107500	56.0127	0.0651043	0.102346
protease	AT3G57810	OS09G0487700	40.5229	0.0651043	0.185801
MYB32	AT4G34990	OS01G0874300	45.2962	0.065257	0.0234217
PP2C	AT1G79630	OS08G0500300	53.2957	0.065257	0.130893
rhodanese-like	AT2G42220	OS09G0279400	56.9038	0.0652737	0.0515462
-	AT5G16730	OS04G0592400	33.727	0.0654205	0.0100671
GLR1.2	AT5G48400	OS06G0188600	21.194	0.0654413	0.119153
kinase	AT1G18390	OS01G0136400	33.3832	0.0656122	0.025574
zinc finger	AT1G19310	OS01G0766200	38.3607	0.0656227	0.0150135
zinc finger	AT1G19310	OS01G0766200	38.3607	0.0656227	0.0246607
hydrolase	AT3G55430	OS11G0704600	47.0339	0.0656453	0.184445
hydrolase	AT3G55430	OS11G0704600	47.0339	0.0656453	0.203662
UDP-glucose/GDP-mannose dehydrogenase	AT3G01010	OS03G0757900	26.6667	0.0657267	0.0466647
DNAJ	AT2G20560	OS02G0306900	71.3467	0.0658231	0.0658231
electron carrier	AT5G03880	OS08G0558200	61.5836	0.0659003	0.132419
kinase	AT4G25160	OS03G0101200	39.4771	0.0661058	0.0147185
kinase	AT4G25160	OS10G0561500	42.8389	0.0661058	0.105025
CTP synthase	AT1G30820	OS01G0616900	65.093	0.0661646	0.0646379
CTP synthase	AT1G30820	OS05G0569700	67.1548	0.0661646	0.159458
CTP synthase	AT1G30820	OS05G0573300	74.1776	0.0661646	0.0110754
CTP synthase	AT1G30820	OS05G0573300	74.1776	0.0661646	0.0144275
ELF4-L3	AT2G06255	OS11G0621500	62.3932	0.0664912	0.112161
-	AT3G15630	OS01G0175100	28.9855	0.0664912	0.156549
-	AT3G15630	OS05G0176700	35.5932	0.0664912	0.15021
-	AT2G16760	OS03G0307400	46.1988	0.0669472	0.11495
eIF-1A	AT5G35680	OS06G0342200	77.0833	0.0671392	0.038179
eIF-1A	AT5G35680	OS06G0342200	77.0833	0.0671392	0.117653
MEE68	AT4G24660	OS09G0466400	44.8029	0.0673531	0.0892153
zinc finger	AT2G16090	OS03G0625800	41.8519	0.0675324	0.0894089
-	AT3G23160	OS04G0169500	78.3019	0.0675324	0.0861076
Ku70-binding	AT3G03420	OS04G0482700	51.2195	0.068147	0.0552132
APP1	AT4G36760	OS06G0664100	62.1622	0.0681532	0.129896
APP1	AT4G36760	OS11G0540100	65.8385	0.0681532	0.00456826
ICU4	AT1G52150	OS01G0200300	58.4687	0.0681551	0.0761712
RBP1	AT1G58470	OS07G0124600	28.1167	0.06819	0.159244
VND7	AT1G71930	OS04G0691300	36.7133	0.068279	0.189444
SAB	AT1G58250	OS03G0353701	46.7066	0.0683775	0.0419305
-	AT2G37940	OS01G0850100	66.2577	0.0684582	0.0131188
-	AT2G37940	OS01G0850100	66.2577	0.0684582	0.0168475
-	AT2G37940	OS01G0850100	66.2577	0.0684582	0.0267447
-	AT2G37940	OS05G0287800	67.7316	0.0684582	0.03289
lipase	AT3G03230	OS01G0859200	42.0749	0.0684637	0.205396
U-box	AT1G67530	OS01G0901000	54	0.0685986	0.00230016
U-box	AT1G67530	OS01G0901000	54	0.0685986	0.0450816
U-box	AT1G67530	OS01G0901000	54	0.0685986	0.173252
PRH19	AT4G04610	OS07G0509800	61.0063	0.068695	0.101192
PRH19	AT4G04610	OS07G0509800	61.0063	0.068695	0.111317
PRH19	AT4G04610	OS07G0509800	61.0063	0.068695	0.175925
ERD	AT4G04340	OS05G0594700	68.6684	0.0688122	0.0496511
ERD	AT4G04340	OS01G0534900	71.4844	0.0688122	0.0281488
ERD	AT4G04340	OS01G0534900	71.4844	0.0688122	0.104242
MAK3	AT2G38130	OS11G0525800	68.0203	0.0689632	0.127873
SVP	AT2G22540	OS03G0186600	50	0.0689632	0.0732027
kinase	AT5G11020	OS08G0285600	43.7995	0.069056	0.0157896
kinase	AT5G11020	OS05G0319700	48.7448	0.069056	0.0576866
UNE7	AT3G03690	OS10G0437000	52.1429	0.0690662	0.0124043
FAD-binding	AT4G20860	OS02G0235900	39.3298	0.0690806	0.0207655
FAD-binding	AT4G20860	OS06G0548800	41.4313	0.0690806	0.165181
FAD-binding	AT4G20860	OS06G0549300	43.5946	0.0690806	0.163094
FAD-binding	AT4G20860	OS06G0549300	43.5946	0.0690806	0.175322
-	AT1G65295	OS11G0463700	40.3226	0.0691044	0.165413
phospholipid/glycerol acyltransferase	AT1G80950	OS05G0357800	54.703	0.0695143	0.0832688
phospholipid/glycerol acyltransferase	AT1G80950	OS05G0357800	54.703	0.0695143	0.164665
sec61beta	AT3G60540	OS12G0173366	60.241	0.0695143	0.171389
sec61beta	AT3G60540	OS01G0565900	66.25	0.0695143	0.115774
protein binding	AT2G22690	OS06G0588900	49.2228	0.0697712	0.087392
-	AT4G11090	OS05G0214900	44.4898	0.0697712	0.180575
-	AT4G11090	OS06G0524400	44.6009	0.0697712	0.122986
potassium channel tetramerisation	AT2G24240	OS09G0259701	23.5294	0.069845	0.172185
potassium channel tetramerisation	AT2G24240	OS02G0213700	33.0882	0.069845	0.172185
potassium channel tetramerisation	AT2G24240	OS06G0159750	33.6585	0.069845	0.172185
potassium channel tetramerisation	AT2G24240	OS02G0612700	57.8603	0.069845	0.0218788
potassium channel tetramerisation	AT2G24240	OS02G0612700	57.8603	0.069845	0.118783
potassium channel tetramerisation	AT2G24240	OS02G0612700	57.8603	0.069845	0.184265
potassium channel tetramerisation	AT2G24240	OS04G0501500	65.859	0.069845	0.0821978
lipase	AT5G58690	OS07G0694000	52.5084	0.069996	0.0210404
lipase	AT5G58690	OS12G0562400	53.0508	0.069996	0.162127
NPD	AT5G64250	OS08G0485400	67.8571	0.069996	0.126665
PR5K	AT5G38280	OS01G0137400	31.0832	0.0700285	0.057119
PR5K	AT5G38280	OS04G0177000	46.0274	0.0700285	0.164861
PR5K	AT5G38280	OS05G0550700	47.7901	0.0700285	0.019686
PR5K	AT5G38280	OS05G0550700	47.7901	0.0700285	0.198308
ROF1	AT3G25230	OS01G0563000	31.5951	0.0702175	0.0582348
-	AT3G01860	OS01G0920100	23.8095	0.0702486	0.0312698
-	AT5G45610	OS02G0128300	21.7489	0.0707291	0.029977
PRPL11	AT1G32990	OS03G0122200	68	0.070764	0.115505
FAD-binding	AT1G30760	OS02G0235900	38.0952	0.0709992	0.0207655
FAD-binding	AT1G30760	OS06G0548800	40.678	0.0709992	0.165181
FAD-binding	AT1G30760	OS06G0549300	41.8738	0.0709992	0.163094
FAD-binding	AT1G30760	OS06G0549300	41.8738	0.0709992	0.175322
-	AT5G01015	OS12G0121000	27.3438	0.0709992	0.0926092
-	AT5G01015	OS12G0121000	27.3438	0.0709992	0.11493
-	AT5G01015	OS11G0121300	28.6885	0.0709992	0.11493
PPR	AT1G31920	OS02G0697500	52.9595	0.0710455	0.17896
bHLH	AT2G40200	OS01G0159800	18.9781	0.0711393	0.04135
PH	AT5G12150	OS07G0658300	54.1906	0.0715794	0.0117606
PH	AT5G12150	OS07G0658300	54.1906	0.0715794	0.0524965
PH	AT5G12150	OS07G0658300	54.1906	0.0715794	0.0701436
PTS	AT5G48840	OS03G0851800	62.6198	0.0718335	0.149979
PDCB4	AT1G69295	OS03G0756300	34.8571	0.0718845	0.0540545
WES1	AT4G27260	OS11G0186500	35.0734	0.0718845	0.121301
WES1	AT4G27260	OS01G0221100	35.2814	0.0718845	0.0214643
WES1	AT4G27260	OS01G0221100	35.2814	0.0718845	0.0215287
WES1	AT4G27260	OS01G0221100	35.2814	0.0718845	0.0909631
WES1	AT4G27260	OS01G0221100	35.2814	0.0718845	0.147494
-	AT4G01080	OS06G0524400	44.1315	0.0719849	0.122986
-	AT4G01080	OS05G0214900	45.7143	0.0719849	0.180575
diacylglycerol acyltransferase	AT3G51520	OS06G0326700	54.4118	0.0719934	0.0216213
diacylglycerol acyltransferase	AT3G51520	OS06G0326700	54.4118	0.0719934	0.0461894
GUS1	AT5G61250	OS03G0211700	53.2347	0.072312	0.08124
GUS1	AT5G61250	OS03G0211700	53.2347	0.072312	0.172089
TCP TF	AT5G51910	OS08G0544800	27.882	0.072312	0.0456119
-	AT4G13030	OS05G0274300	34.8168	0.072312	0.0996439
PYK10	AT3G09260	OS04G0474500	40.6143	0.0723349	0.0539506
PYK10	AT3G09260	OS04G0474500	40.6143	0.0723349	0.156514
PYK10	AT3G09260	OS06G0320200	45.4545	0.0723349	0.110295
-	AT1G21670	OS03G0840200	46.657	0.0723349	0.189245
adhesion regulating molecule	AT2G26590	OS05G0594800	61.7647	0.072454	0.181881
inter-alpha-trypsin inhibitor heavy chain	AT1G72500	OS11G0115800	38.8889	0.0726824	0.175789
UTP:galactose-1-phosphate uridylyltransferase/ ribose-5-phosphate adenylyltransferase	AT5G18200	OS07G0171200	52.7027	0.0726824	0.189902
PHB4	AT3G27280	OS04G0462900	67.9054	0.0729147	0.0785234
PHB4	AT3G27280	OS04G0462900	67.9054	0.0729147	0.171275
HRB1	AT5G49230	OS05G0358000	34.764	0.0731296	0.204657
HRB1	AT5G49230	OS12G0556100	37.156	0.0731296	0.0327347
-	AT5G19240	OS07G0645000	30.9278	0.0734834	0.0669099
PEX12	AT3G04460	OS10G0467200	69.0355	0.0735128	0.129707
sks4	AT4G22010	OS06G0678800	69.0037	0.0735128	0.147173
-	AT4G36210	OS03G0112800	60.3631	0.0736226	0.141491
glucosamine/galactosamine-6-phosphate isomerase	AT1G13700	OS03G0416500	53.0405	0.0737363	0.102714
glucosamine/galactosamine-6-phosphate isomerase	AT1G13700	OS03G0416500	53.0405	0.0737363	0.157206
glucosamine/galactosamine-6-phosphate isomerase	AT1G13700	OS07G0604000	54.6429	0.0737363	0.135256
zinc finger	AT2G33500	OS08G0536300	28.0738	0.0737882	0.114501
-	AT4G00440	OS04G0559200	19.3287	0.0738442	0.0443186
-	AT4G00440	OS10G0550000	19.8668	0.0738442	0.0194848
-	AT2G31110	OS01G0652100	45.1531	0.0741207	0.0282197
lipase	AT1G34340	OS01G0871100	50.6873	0.0743096	0.057119
-	AT5G01030	OS03G0267600	18.2425	0.0744756	0.0532656
MAPKKK14	AT2G30040	OS03G0292700	31.5315	0.0746868	0.025358
CYP72A11	AT3G14650	OS01G0627500	9.36903	0.0747256	0.00191364
CYP72A11	AT3G14650	OS01G0627600	43.1325	0.0747256	0.005295
CYP72A11	AT3G14650	OS01G0627400	47.2924	0.0747256	0.202291
CYP72A11	AT3G14650	OS01G0728300	50.0963	0.0747256	0.083566
CYP72A11	AT3G14650	OS05G0372300	50.0963	0.0747256	0.0294148
CYP72A11	AT3G14650	OS01G0627800	50.1873	0.0747256	0.00720461
CYP72A11	AT3G14650	OS01G0628700	50.4708	0.0747256	0.105163
RPP13	AT3G46530	OS03G0709200	22.3149	0.0747609	0.0315066
RPP13	AT3G46530	OS03G0709200	22.3149	0.0747609	0.0537529
RPP13	AT3G46530	OS10G0183000	22.8188	0.0747609	0.0139272
ZFP7	AT1G24625	OS03G0239300	29.1667	0.0748368	0.11548
GAUT4	AT5G47780	OS09G0480400	48.5149	0.0749478	0.114116
GAUT4	AT5G47780	OS08G0496200	55.0186	0.0749478	0.0453019
GBF3	AT2G46270	OS01G0658900	34.1667	0.0750245	0.0707362
glycosyltransferase	AT3G24040	OS03G0145300	19.0476	0.0750245	0.182812
long-chain acyl-CoA synthetase	AT1G64400	OS01G0681200	65.7143	0.0750245	0.0729492
long-chain acyl-CoA synthetase	AT1G64400	OS01G0681200	65.7143	0.0750245	0.100305
XYL3	AT5G09730	OS04G0640700	64.7059	0.0751435	0.0718499
ARO3	AT4G36030	OS10G0147900	46.3636	0.0751602	0.0988693
-	AT4G31020	OS02G0796600	77.6515	0.0751961	0.0399556
PGM	AT1G78050	OS02G0751800	65.9639	0.0752525	0.0812544
NRT2.3	AT5G60780	OS02G0112100	66.9794	0.0753521	0.0426027
NRT2.3	AT5G60780	OS02G0112100	66.9794	0.0753521	0.0549263
NRT2.3	AT5G60780	OS02G0112100	66.9794	0.0753521	0.0738849
NRT2.3	AT5G60780	OS02G0112600	66.9794	0.0753521	0.0426027
NRT2.3	AT5G60780	OS02G0112600	66.9794	0.0753521	0.0549263
SEC14 cytosolic factor	AT4G08690	OS02G0752000	42.328	0.0755977	0.201483
[truncated: 1,336 more rows]

## Sheet: Fl vs gnd filtered for Q-values
Supplementary Table 5.2
Data in Suplpementary table 5.1 filtered for Q values of both Arabidopsis and Rice data Q<0.05.
Arabidopsis Gene Symbol	Arabidopsis Locus ID	Rice Ortholog Gene_id	% identity of rice ortholog to Arabidopsis gene	adj.P-Val for Arabidopsis data	adj.P.Val for Rice data
RNA-binding cp33	AT1G01080	OS08G0117100	36.0502	0.0337989	0.037589
ozone-responsive stress	AT1G01170	OS06G0114500	68.3544	0.00722891	0.0139272
U-box	AT1G01660	OS10G0548850	24.6914	0.00976978	0.00848062
zinc ion binding	AT1G02750	OS12G0556100	26.1468	0.00425446	0.0327347
bHLH	AT1G03040	OS03G0797600	52.0408	0.0278877	0.0238527
RING1B	AT1G03770	OS01G0796700	31.9018	0.0348282	0.02622
glutaredoxin	AT1G03850	OS01G0667900	31.9728	0.000139	0.0281431
IAA17	AT1G04250	OS12G0601300	49.0975	0.0206641	0.0180827
NRT2;1AT	AT1G08090	OS02G0112100	71.4822	0.0202944	0.0426027
NRT2;1AT	AT1G08090	OS02G0112600	71.4822	0.0202944	0.0426027
PSAO	AT1G08380	OS04G0414700	64.7887	0.000593741	0.0345741
ACHT4	AT1G08570	OS03G0326500	54.5455	0.00454182	0.0317432
ZIGA4	AT1G08680	OS03G0323500	34.4444	0.0394706	0.005295
BIP3	AT1G09080	OS05G0428600	66.8122	0.000721249	0.013632
protein binding	AT1G10650	OS02G0130300	35.5685	0.0135261	0.014023
PAK	AT1G12430	OS06G0137100	77.972	0.0222465	0.0274824
IQD28	AT1G14380	OS01G0716200	29.0941	0.0353782	0.0194613
enzyme inhibitor/ pectinesterase/ pectinesterase inhibitor	AT1G14890	OS10G0186200	20.1646	0.00687755	0.0307018
scpl50	AT1G15000	OS01G0629600	43.3628	0.00473104	0.038179
binding	AT1G15290	OS04G0645100	43.3721	0.00700636	0.00501935
F-box	AT1G15670	OS06G0594400	37.5328	0.0204665	0.0311584
-	AT1G16000	OS08G0272000	60	0.0436381	0.0331393
kinase	AT1G16260	OS12G0615300	28.8204	0.00030487	0.0157896
phosphatase	AT1G17710	OS01G0720400	52.1898	0.00528288	0.005295
PGDH	AT1G17745	OS08G0447000	69.7262	0.0302269	0.0443027
-	AT1G19835	OS10G0162400	39.2699	0.00184905	0.0424468
SKP2A	AT1G21410	OS05G0425700	63.5638	0.0121795	0.0303144
-	AT1G21560	OS05G0423200	15.8568	0.00973666	0.0315487
LYM1	AT1G21880	OS06G0208800	49.6933	0.0357618	0.0294395
PIPK1	AT1G21980	OS03G0705300	63.8851	0.0164872	0.0167712
PIPK1	AT1G21980	OS03G0262000	59.3607	0.0164872	0.0299626
protein binding	AT1G24440	OS01G0905700	45.6349	0.0388203	0.0261474
protease	AT1G25510	OS01G0140100	52.5794	0.0464918	0.0201965
FAD-binding	AT1G26380	OS02G0235900	36.6843	0.0245109	0.0207655
FAD-binding	AT1G26390	OS02G0235900	38.448	0.0222038	0.0207655
FAD-binding	AT1G26410	OS02G0235900	37.5661	0.0114665	0.0207655
FAD-binding	AT1G26420	OS02G0235900	36.8607	0.00343487	0.0207655
-	AT1G27510	OS01G0107900	44.9761	0.0350531	0.0300205
-	AT1G27510	OS01G0107900	44.9761	0.0350531	0.0461997
ZAT10	AT1G27730	OS12G0583700	35.6275	0.00236135	0.0476591
-	AT1G27850	OS12G0239000	27.7683	0.0271917	0.0111984
-	AT1G27850	OS12G0239200	27.3649	0.0271917	0.021209
GRX480	AT1G28480	OS01G0667900	41.4966	0.000432484	0.0281431
FAD-binding	AT1G30700	OS02G0235900	38.0952	0.000792466	0.0207655
FAD-binding	AT1G30740	OS02G0235900	35.9788	0.0191273	0.0207655
LOL1	AT1G32540	OS08G0159500	60.3261	0.0178606	0.0183562
LOL1	AT1G32540	OS08G0159500	60.3261	0.0178606	0.0189828
LOL1	AT1G32540	OS08G0159500	60.3261	0.0178606	0.0227917
LOL1	AT1G32540	OS08G0159500	60.3261	0.0178606	0.0231542
starch synthase	AT1G32900	OS07G0412100	63.9803	0.00222695	0.049397
anac016	AT1G34180	OS09G0493700	20.9402	0.0172134	0.0236993
SERK2	AT1G34210	OS08G0176200	79.6482	0.0416722	0.0305904
TLP5	AT1G43640	OS08G0103300	58.98	0.0318477	0.0427021
PUP11	AT1G44750	OS02G0689200	56.8831	0.0258333	0.0108788
PUP11	AT1G44750	OS09G0548600	44.7977	0.0258333	0.0436697
RKL1	AT1G48480	OS03G0223000	51.5556	0.0113492	0.0423826
-	AT1G50040	OS07G0133500	43.9394	0.0242653	0.00831131
binding	AT1G50450	OS11G0140700	61.6438	0.0494268	0.0268137
SPP1	AT1G51420	OS01G0376700	56.5012	0.00869072	0.0470831
SPP1	AT1G51420	OS02G0143100	58.6288	0.00869072	0.0481256
ERF8	AT1G53170	OS04G0610400	37.3874	0.00526649	0.0316676
HSP17.6C-CI	AT1G53540	OS03G0266300	69.5652	0.0463804	0.0219958
GLY3	AT1G53580	OS01G0667200	59.0164	0.0105904	0.0126112
rubredoxin	AT1G54500	OS08G0323400	46.5438	0.016658	0.0199752
BTB	AT1G55760	OS08G0495500	55.4545	0.0139972	0.0131679
ATSK42	AT1G57870	OS03G0841800	79.4811	0.0271917	0.0234006
-	AT1G60010	OS08G0420700	33.8624	0.00427635	0.005295
potassium transporter	AT1G60160	OS09G0376900	67.959	0.0334744	0.0379834
NIK3	AT1G60800	OS01G0171000	67.8344	0.0186825	0.0363855
ACO2	AT1G62380	OS09G0451000	63.9752	0.000701872	0.0197556
PP2-A11	AT1G63090	OS02G0224900	36.2869	0.0114153	0.012351
PP2-A11	AT1G63090	OS10G0522400	40	0.0114153	0.0310732
PA	AT1G63690	OS06G0730900	68.6347	0.0342829	0.0152413
PPR	AT1G64100	OS04G0351333	15.6997	0.0284635	0.02155
AAA-type ATPase	AT1G64110	OS05G0584600	61.5205	0.0241297	0.0308385
AAA-type ATPase	AT1G64110	OS01G0226400	68.8095	0.0241297	0.0490954
intracellular transport USO1	AT1G64180	OS02G0260500	29.3763	0.013797	0.0164619
proline-rich	AT1G64450	OS05G0238400	39.485	0.0112439	0.0433599
-	AT1G65020	OS10G0577000	48.4756	0.0485982	0.0252425
microsomal glutathione s-transferase	AT1G65820	OS03G0709000	56.7568	0.0341959	0.0202356
MATE efflux	AT1G66760	OS05G0554000	46.3235	0.011258	0.0125922
kinase	AT1G66880	OS01G0136400	38.6228	0.0447478	0.025574
-	AT1G67600	OS01G0901800	54.9708	0.00584599	0.013632
-	AT1G67600	OS01G0901800	54.9708	0.00584599	0.0198079
ribosome	AT1G68590	OS04G0461100	38.7978	0.00267366	0.0110868
kinase	AT1G68690	OS01G0738300	47.69	0.00419268	0.0287949
U-box	AT1G68940	OS02G0727300	35.3783	0.0440656	0.0443186
kinase	AT1G69790	OS10G0405100	59.3458	0.00444025	0.0283178
CEL1	AT1G70710	OS02G0733300	70.2756	0.0457748	0.0307931
kinase	AT1G70740	OS09G0408900	34.3478	0.00147173	0.0424468
C2	AT1G70790	OS07G0500300	42.7746	0.0287957	0.0457174
C2	AT1G70810	OS07G0500300	41.0405	0.0115908	0.0457174
-	AT1G70900	OS08G0433200	64.8	0.0179558	0.00818441
MATE efflux	AT1G71140	OS05G0554000	51.7157	0.00186488	0.0125922
CK	AT1G71697	OS01G0183000	57.7657	0.00016727	0.0293059
kinase	AT1G72540	OS08G0457400	43.9331	0.03856	0.0414976
threonine synthase	AT1G72810	OS01G0693800	69.7143	0.0116261	0.0458728
phosphatase	AT1G73010	OS01G0720400	53.6496	0.00969612	0.005295
geranylgeranyl reductase	AT1G74470	OS02G0744900	68.2505	0.000546532	0.0469366
ER lumen retaining receptor	AT1G75760	OS08G0548200	82.3529	0.0146784	0.0102713
pathogenesis-related thaumatin	AT1G75800	OS03G0244200	48.1928	0.00622383	0.0490102
pyrophosphate-dependent 6-phosphofructose-1-kinase	AT1G76550	OS02G0714200	77.6337	0.0230849	0.0335495
ACR3	AT1G76990	OS02G0555600	56.9647	0.00542137	0.0111164
ACR3	AT1G76990	OS02G0555600	56.9647	0.00542137	0.0396021
SKP2B	AT1G77000	OS05G0425700	60.1064	0.000792466	0.0303144
-	AT1G77220	OS05G0516900	61.0656	0.0215578	0.0153555
BGAL16	AT1G77410	OS05G0428100	54.254	0.0230849	0.0444975
-	AT1G77890	OS07G0626300	38.4259	0.000597038	0.0151984
F-box	AT1G80440	OS06G0594400	37.0079	0.000432484	0.0311584
kinase	AT1G80640	OS08G0285600	41.9525	0.00281376	0.0157896
transducin	AT1G80670	OS01G0635400	73.8372	0.0417781	0.00913663
CCR2	AT1G80820	OS08G0277200	56.4327	0.0281539	0.0333772
MPK17	AT2G01450	OS01G0643800	64.2715	0.0352709	0.0470691
MAP65-6	AT2G01910	OS03G0237600	53.6066	0.00780577	0.0200313
APK2B	AT2G02800	OS10G0405100	65.1869	0.0190306	0.0283178
RNS1	AT2G02990	OS08G0434100	53.7118	0.00297369	0.0093055
transferase, transferring glycosyl groups	AT2G03360	OS01G0956200	28.9206	0.00722183	0.0401234
IBR5	AT2G04550	OS06G0308100	56.6308	0.00278031	0.0152323
SCL21	AT2G04890	OS07G0583600	44.6691	0.0355393	0.0273652
hydrolase	AT2G05790	OS07G0539300	37.0884	0.00122584	0.0441375
PSBX	AT2G06520	OS07G0673550	41.8803	0.00117985	0.0183562
PSBX	AT2G06520	OS07G0673550	41.8803	0.00117985	0.0262235
MGDC	AT2G11810	OS08G0299400	70.098	0.00348021	0.00757156
gibberellin-regulated	AT2G14900	OS03G0760800	46.2366	0.0357689	0.0360955
-	AT2G16190	OS05G0549300	25.2252	0.0249842	0.0470149
HIS1-3	AT2G18050	OS06G0130800	26.25	0.0120134	0.0419668
MPK7	AT2G18170	OS02G0148100	81.3513	0.00441585	0.0210404
TET2	AT2G19580	OS06G0572400	55.8824	0.0382462	0.048161
ATP binding	AT2G20050	OS02G0281000	61.8785	0.0412592	0.0133875
THF1	AT2G20890	OS07G0558500	66.2021	0.0280441	0.0121657
THF1	AT2G20890	OS07G0558500	66.2021	0.0280441	0.032998
DNAJ	AT2G21510	OS05G0543700	64.497	0.00332555	0.0438064
lipid-associated	AT2G22170	OS04G0456700	40.9326	0.0163639	0.0451564
transport	AT2G23360	OS04G0649200	28.8503	0.00885603	0.0120841
transport	AT2G23360	OS04G0505000	22.7696	0.00885603	0.0190397
YCF37	AT2G23670	OS02G0815300	30.9783	0.00434258	0.0201016
PUP5	AT2G24220	OS09G0557500	57.732	0.0482384	0.016773
-	AT2G26110	OS05G0540900	17.8191	0.00756017	0.00777939
KCS11	AT2G26640	OS06G0598800	76.3006	0.0408367	0.032677
bile acid:sodium symporter	AT2G26900	OS01G0645200	71.599	0.0208131	0.0260254
F-box	AT2G27310	OS04G0414500	33.0508	0.00747755	0.032783
FUC1	AT2G28100	OS04G0560400	55.0388	0.0293654	0.00676833
nodulin	AT2G28120	OS12G0637700	47.9094	0.0072485	0.00441845
nodulin	AT2G28120	OS12G0637700	47.9094	0.0072485	0.0250777
-	AT2G28400	OS02G0629000	31.1765	0.00196214	0.0290017
zinc finger	AT2G28510	OS02G0707200	21.5278	0.00222695	0.0488921
KCS12	AT2G28630	OS10G0472900	51.3979	0.0417781	0.0291324
cupin	AT2G28680	OS05G0116000	69.9164	0.000887712	0.0321856
EXPA6	AT2G28950	OS03G0822000	77.2727	0.0212076	0.0341219
THIC	AT2G29630	OS03G0679700	80.9077	0.000740762	0.0329356
PSBW	AT2G30570	OS01G0773700	58.0645	0.000593741	0.0168591
ADF6	AT2G31200	OS10G0521100	57.6159	0.0191273	0.0230796
ethylene-responsive	AT2G31730	OS04G0493100	42.9487	0.0465331	0.0425684
hydrolase	AT2G32150	OS03G0701200	46.0145	0.000139	0.04135
-	AT2G32380	OS03G0646400	44.5783	0.0337989	0.0251711
-	AT2G32380	OS03G0646400	44.5783	0.0337989	0.0474396
WL2	AT2G34180	OS01G0759400	52.4074	0.010766	0.005295
WL2	AT2G34180	OS05G0514200	55.7087	0.010766	0.0272305
WL2	AT2G34180	OS01G0759400	52.4074	0.010766	0.0300205
CYP710A2	AT2G34490	OS01G0211600	62.3037	0.0113788	0.042772
CYP710A1	AT2G34500	OS01G0211600	65.445	0.00573389	0.042772
HIN1	AT2G35460	OS01G0864300	30.2905	0.0122917	0.0403984
integral membrane	AT2G35760	OS12G0514300	35.6688	0.0465908	0.00849475
integral membrane	AT2G35760	OS12G0514300	35.6688	0.0465908	0.0177695
integral membrane	AT2G35760	OS12G0514300	35.6688	0.0465908	0.0302681
YLS9	AT2G35980	OS01G0864300	30.2905	0.0284635	0.0403984
mTERF	AT2G36000	OS03G0360600	36.8771	0.0223428	0.0337073
-	AT2G36835	OS01G0776700	40	0.00286303	0.0158825
-	AT2G36835	OS01G0776700	40	0.00286303	0.0399974
ZAT11	AT2G37430	OS03G0820400	31.25	0.0230849	0.0158109
ZAT11	AT2G37430	OS03G0820300	25.2941	0.0230849	0.0328222
ZAT11	AT2G37430	OS01G0839100	28.655	0.0230849	0.0353662
aldo/keto reductase	AT2G37770	OS05G0456300	67.4847	0.0139125	0.0311774
aldo/keto reductase	AT2G37770	OS01G0847600	69.7749	0.0139125	0.0481298
glycoprotein	AT2G39050	OS01G0104400	45.8955	0.0452912	0.0312491
glycoprotein	AT2G39050	OS01G0104400	45.8955	0.0452912	0.0315536
ATH8	AT2G39190	OS02G0805800	40.999	0.0308269	0.0388944
nodulin	AT2G39210	OS12G0637700	51.5679	0.0204665	0.00441845
nodulin	AT2G39210	OS12G0637700	51.5679	0.0204665	0.0250777
gibberellin-regulated	AT2G39540	OS03G0760800	54.8387	0.0194271	0.0360955
-	AT2G40480	OS07G0677900	27.7457	0.0350531	0.0496103
nucleolar gar2	AT2G42320	OS09G0487200	40.7692	0.0244188	0.0478594
protein kinase C substrate, heavy chain	AT2G42390	OS01G0752400	33.8624	0.0331951	0.0475857
TF	AT2G43140	OS01G0900800	28.1654	0.0286657	0.0395966
ETFQO	AT2G43400	OS10G0516300	55.2941	0.0120157	0.0392848
FH2	AT2G43800	OS01G0897700	50	0.0334744	0.0201633
SPX3	AT2G45130	OS10G0392600	46.2094	0.0058171	0.00302366
SPX3	AT2G45130	OS07G0614700	35.8209	0.0058171	0.00456826
scarecrow TF	AT2G45160	OS10G0551200	37.1859	0.0111409	0.0247419
FLA8	AT2G45470	OS03G0128000	46.6334	0.00618073	0.0117102
FLA8	AT2G45470	OS04G0574200	53.3643	0.00618073	0.0330842
CYP76C2	AT2G45570	OS09G0447300	27.6471	0.00445641	0.0158825
CYP76C2	AT2G45570	OS02G0571900	38.4766	0.00445641	0.0322448
armadillo/beta-catenin repeat	AT2G45720	OS03G0116900	57.016	0.00869072	0.0444906
U-box	AT2G45920	OS10G0548850	24.9383	0.0112439	0.00848062
TMP-A	AT2G45960	OS02G0823100	76.0417	0.0264856	0.0151913
FAD-binding	AT2G46740	OS04G0361500	33.4426	0.0244014	0.0419305
zinc finger	AT2G47890	OS03G0351100	23.8213	0.0244708	0.0312101
RAD23-3	AT3G02540	OS08G0430200	56.1576	0.0479477	0.00907143
stearoyl-ACP desaturase	AT3G02630	OS04G0379900	75.1282	0.0286603	0.0234277
stearoyl-ACP desaturase	AT3G02630	OS04G0379900	75.1282	0.0286603	0.0476339
TRXF1	AT3G02730	OS01G0913000	52.9412	0.0114153	0.0194206
phagocytosis and cell motility ELMO1	AT3G03610	OS11G0129600	37.3057	0.0444994	0.0392277
phagocytosis and cell motility ELMO1	AT3G03610	OS12G0126200	50.625	0.0444994	0.0392277
PPCK2	AT3G04530	OS04G0517500	36.2069	0.0122401	0.0271844
-	AT3G04550	OS10G0445600	39.2324	0.0172544	0.0454123
PNC1	AT3G05290	OS05G0392700	65.7576	0.0499026	0.0179736
PAP15	AT3G07130	OS03G0848200	68.3628	0.0059305	0.0139857
-	AT3G07190	OS07G0291200	49.2857	0.0278799	0.00742267
HCF152	AT3G09650	OS12G0102600	52.7977	0.0377726	0.0382978
xanthine/uracil permease	AT3G10960	OS05G0332600	68.523	0.0373949	0.0380118
myb	AT3G11280	OS01G0853700	38.796	0.00550241	0.0157306
glucosyl transferase	AT3G11340	OS07G0241800	37.5546	0.000199237	0.0289144
glucosyl transferase	AT3G11340	OS07G0241800	37.5546	0.000199237	0.036019
-	AT3G11760	OS03G0649000	48.5969	0.025998	0.0256065
chaperonin	AT3G13470	OS06G0114000	85.1913	0.0302968	0.0160261
CYP72A8	AT3G14620	OS01G0627500	8.98662	0.012542	0.00191364
CYP72A8	AT3G14620	OS01G0627600	41.4458	0.012542	0.005295
CYP72A8	AT3G14620	OS01G0627800	46.0674	0.012542	0.00720461
CYP72A8	AT3G14620	OS05G0372300	47.5915	0.012542	0.0294148
CYP72A13	AT3G14660	OS01G0627500	9.36903	0.0356788	0.00191364
CYP72A13	AT3G14660	OS01G0627600	43.8554	0.0356788	0.005295
CYP72A13	AT3G14660	OS01G0627800	50.9363	0.0356788	0.00720461
CYP72A13	AT3G14660	OS05G0372300	49.9037	0.0356788	0.0294148
CYP72A15	AT3G14690	OS01G0627500	9.56023	0.00375379	0.00191364
CYP72A15	AT3G14690	OS01G0627600	44.5783	0.00375379	0.005295
CYP72A15	AT3G14690	OS01G0627800	50	0.00375379	0.00720461
CYP72A15	AT3G14690	OS05G0372300	50.4817	0.00375379	0.0294148
PPC3	AT3G14940	OS01G0758300	83.7662	0.0124967	0.00779844
RALFL23	AT3G16570	OS02G0670500	41.1765	0.0138239	0.00494292
RALFL23	AT3G16570	OS01G0357900	39.3162	0.0138239	0.0244306
RALFL23	AT3G16570	OS01G0358100	42.2414	0.0138239	0.0427021
kinase	AT3G17770	OS03G0719300	74.7475	0.00470719	0.0263203
-	AT3G19370	OS04G0649200	17.462	0.0275878	0.0120841
-	AT3G19370	OS04G0505000	14.3808	0.0275878	0.0190397
AZF2	AT3G19580	OS12G0583700	39.2713	0.000701872	0.0476591
-	AT3G23760	OS07G0189800	41.1504	0.0249998	0.044565
permease	AT3G23870	OS04G0373000	67.4825	0.0146784	0.0207655
permease	AT3G23870	OS02G0498300	50.3817	0.0146784	0.0331393
ABC1	AT3G24190	OS02G0816600	74.2268	0.018034	0.00728538
VAMP728	AT3G24890	OS03G0165800	27.3543	0.0419622	0.0382978
bile acid:sodium symporter	AT3G25410	OS02G0475400	59.5745	0.0103817	0.0168152
calcium ion binding	AT3G25600	OS05G0577500	57.2254	0.0443176	0.00580646
SCRM	AT3G26744	OS01G0928000	48.0315	0.000539455	0.0384201
PMZ	AT3G28210	OS09G0385700	43.617	0.00304368	0.0261383
AAA-type ATPase	AT3G28510	OS07G0192000	43.9922	0.00855676	0.0197908
AAA-type ATPase	AT3G28540	OS07G0192000	42.6357	0.000619621	0.0197908
CYP81D1	AT3G28740	OS03G0760200	39.3762	0.0399978	0.0407963
glucan phosphorylase	AT3G29320	OS03G0758100	73.2662	0.0154116	0.0493676
MES11	AT3G29770	OS07G0603600	67.0251	0.00365986	0.0121657
SEN1	AT3G45590	OS06G0530700	27.8146	0.0321891	0.028325
zinc finger	AT3G46070	OS03G0820400	29.8611	0.00224875	0.0158109
zinc finger	AT3G46070	OS03G0820300	27.6471	0.00224875	0.0328222
zinc finger	AT3G46070	OS01G0839100	27.4854	0.00224875	0.0353662
zinc finger	AT3G46620	OS01G0972000	35.3293	0.010512	0.0419668
PHS2	AT3G46970	OS01G0851700	79.0725	0.0216963	0.0128853
glycerol 3-phosphate permease	AT3G47420	OS08G0156600	64.1283	0.00180356	0.00779844
glycerol 3-phosphate permease	AT3G47420	OS04G0555300	63.7899	0.00180356	0.0301183
aldose 1-epimerase	AT3G47800	OS02G0575800	46.5608	0.0299011	0.0389265
AHA4	AT3G47950	OS07G0191200	87.1473	0.0323644	0.00573428
AHA4	AT3G47950	OS12G0638700	88.7029	0.0323644	0.026726
CEJ1	AT3G50260	OS06G0166400	40.2174	0.00205054	0.0231435
CEJ1	AT3G50260	OS06G0166400	40.2174	0.00205054	0.0356956
-	AT3G51720	OS07G0677900	28.9017	0.00546055	0.0496103
CPK13	AT3G51850	OS05G0467000	78.0622	0.0164872	0.0217295
CPK13	AT3G51850	OS01G0832300	77.4955	0.0164872	0.0242921
HSFA7A	AT3G51910	OS10G0419300	39.9441	0.0257957	0.0424468
UGT73D1	AT3G53150	OS01G0176000	42.1687	0.000539455	0.0148832
UGT73C7	AT3G53160	OS01G0176000	39.9598	0.0310124	0.0148832
PIP2A	AT3G53420	OS04G0521100	79.6552	0.000335945	0.0232089
zinc finger	AT3G53600	OS03G0820400	31.9444	0.00549779	0.0158109
zinc finger	AT3G53600	OS03G0820300	27.6471	0.00549779	0.0328222
zinc finger	AT3G53600	OS01G0839100	26.9006	0.00549779	0.0353662
-	AT3G55250	OS05G0526200	51.6605	0.00710066	0.0190397
-	AT3G56270	OS07G0677900	23.8921	0.0249998	0.0496103
remorin	AT3G57540	OS07G0208600	45.0382	0.0106179	0.0457376
-	AT3G57780	OS09G0487200	38.5897	0.0374206	0.0478594
CSY2	AT3G58750	OS02G0232400	80	0.0172471	0.00878399
gsl11	AT3G59100	OS01G0533500	61.6071	0.0201582	0.0264449
GUN4	AT3G59400	OS11G0267000	45.0549	0.00700684	0.0417539
PP2-A13	AT3G61060	OS02G0224900	35.443	0.00196214	0.012351
PP2-A13	AT3G61060	OS10G0522400	46.6667	0.00196214	0.0310732
AGL13	AT3G61120	OS04G0580700	48.8189	0.00202094	0.0361463
-	AT3G61380	OS10G0550000	16.4262	0.0457748	0.0194848
-	AT3G61380	OS04G0559200	16.2037	0.0457748	0.0443186
U-box	AT3G61390	OS10G0548850	27.9012	0.00139774	0.00848062
PIP1A	AT3G61430	OS02G0823100	82.9861	0.0028017	0.0151913
CYSC1	AT3G61440	OS04G0165700	67.9045	0.013852	0.0476646
-	AT3G61870	OS02G0122500	60.5735	0.0013914	0.0149563
TMP-C	AT4G00430	OS02G0823100	82.9861	0.00449785	0.0151913
-	AT4G01897	OS03G0564200	52.1008	0.00772871	0.021209
PII	AT4G01900	OS05G0133100	50	0.016512	0.0201391
kinase	AT4G02410	OS03G0258000	49.8016	0.0295623	0.0124043
kinase	AT4G02410	OS04G0531400	51.5723	0.0295623	0.0147355
RMA1	AT4G03510	OS04G0530500	26.087	0.000290434	0.0381678
RMA1	AT4G03510	OS02G0639800	24.4755	0.000290434	0.0392277
RMA1	AT4G03510	OS02G0639800	24.4755	0.000290434	0.0457301
ATPC1	AT4G04640	OS07G0513000	71.7877	0.00107689	0.041337
PSII-Q	AT4G05180	OS07G0544800	57.6037	0.000286135	0.00676833
kinase	AT4G09760	OS01G0183000	52.0436	0.0419969	0.0293059
wound-responsive	AT4G10270	OS04G0635100	58.1395	0.0420997	0.0125922
SEC1B	AT4G12120	OS04G0252400	60.3053	0.0148213	0.00489578
AAE15	AT4G14070	OS03G0845500	58.9333	0.0470305	0.0447406
-	AT4G14760	OS03G0637900	21.1628	0.0168852	0.00456826
dihydrolipoyl dehydrogenase	AT4G16155	OS01G0337900	78.2531	0.0165705	0.0457301
integral membrane	AT4G16442	OS12G0514300	31.2102	0.0357795	0.00849475
integral membrane	AT4G16442	OS12G0514300	31.2102	0.0357795	0.0177695
integral membrane	AT4G16442	OS12G0514300	31.2102	0.0357795	0.0302681
ERF-6-6	AT4G17490	OS04G0547600	27.1341	0.00969612	0.0157896
SCABP5	AT4G17615	OS10G0564800	77.4648	0.0477868	0.023885
MRH1	AT4G18640	OS01G0674800	53.7838	0.00281155	0.0301833
HSF A4A	AT4G18880	OS05G0530400	31.8083	0.0203018	0.0335725
hydrolase	AT4G19810	OS04G0376400	26.9311	0.040328	0.013632
FAD-binding	AT4G20830	OS02G0235900	38.0952	0.0016951	0.0207655
PSBQA	AT4G21280	OS07G0544800	61.2903	0.000701872	0.00676833
kinase	AT4G21410	OS07G0540100	39.0805	0.0280441	0.0317915
HSP26.5-P	AT4G21870	OS07G0517100	31.7919	0.000792466	0.0267447
WRKY31	AT4G22070	OS01G0246700	29.7821	0.0044737	0.0330958
WRKY31	AT4G22070	OS01G0246700	29.7821	0.0044737	0.04135
ERD	AT4G22120	OS01G0534900	71.6146	0.0204039	0.0281488
ERD	AT4G22120	OS05G0594700	69.0601	0.0204039	0.0496511
SRF8	AT4G22130	OS06G0634500	54.1936	0.0108958	0.0179076
embryo-abundant	AT4G22530	OS01G0716500	45.2471	0.0025002	0.0102231
embryo-abundant	AT4G22530	OS01G0716500	45.2471	0.0025002	0.0118977
kinase	AT4G23280	OS07G0540100	37.5	0.0101132	0.0317915
hydrolase	AT4G24160	OS09G0520200	75.3623	0.008616	0.00755387
TAR2	AT4G24670	OS01G0169800	54.2056	0.0196816	0.0494755
-	AT4G25170	OS02G0657700	24.4648	0.00910392	0.0352122
zinc finger	AT4G25610	OS09G0570200	34.4383	0.018863	0.0111164
LRR	AT4G26050	OS04G0605300	53.9773	0.0349096	0.0124043
-	AT4G26130	OS05G0540900	16.7553	0.0182227	0.00777939
PFK3	AT4G26270	OS06G0151900	66.0256	0.0172134	0.0111984
CBL7	AT4G26560	OS12G0162400	58.8496	0.012544	0.0365673
CYP709B3	AT4G27710	OS03G0371000	45.2514	0.00193396	0.0200313
CYP709B3	AT4G27710	OS07G0418500	45.6647	0.00193396	0.0244415
-	AT4G27900	OS05G0595300	37.6623	0.00295426	0.0129125
-	AT4G27900	OS05G0595300	37.6623	0.00295426	0.0266064
-	AT4G27900	OS05G0595300	37.6623	0.00295426	0.0376945
kinase	AT4G29050	OS03G0258000	48.2143	0.0452869	0.0124043
kinase	AT4G29050	OS04G0531400	48.5849	0.0452869	0.0147355
VAMP711	AT4G32150	OS06G0174400	72.8507	0.0451666	0.0360068
-	AT4G32870	OS01G0198900	23.6111	0.00111881	0.00571908
-	AT4G32870	OS01G0198900	23.6111	0.00111881	0.00742267
glycine-rich	AT4G32920	OS01G0187400	60.0978	0.0345806	0.0133518
PP2C	AT4G33920	OS12G0580900	63.0102	0.0342829	0.00848886
SAUR_E	AT4G34750	OS04G0662200	30.7692	0.0293187	0.0234006
TMT2	AT4G35300	OS02G0229400	71.0456	0.00470114	0.00849475
TMT2	AT4G35300	OS10G0539900	71.6216	0.00470114	0.00939958
TMT2	AT4G35300	OS10G0539900	71.6216	0.00470114	0.0406179
ATP-binding region, ATPase-like	AT4G36290	OS10G0181700	50.4105	0.046823	0.0371787
SPT	AT4G36930	OS02G0805250	29.6429	0.01395	0.0227786
RCCR	AT4G37000	OS10G0389300	35.2941	0.0114153	0.0193837
CYP81D5	AT4G37320	OS03G0760200	42.3002	0.0290461	0.0407963
CYP81D8	AT4G37370	OS03G0760200	41.3255	0.00145836	0.0407963
-	AT4G38390	OS04G0563000	54.8913	0.0402586	0.0445049
PIS2	AT4G38570	OS06G0492000	31.6456	0.0160258	0.0346149
1-phosphatidylinositol phosphodiesterase	AT4G38690	OS09G0535900	63.5015	0.00575571	0.0379648
NST-K1	AT4G39390	OS12G0154600	73.2733	0.0360018	0.0238197
DWF2	AT4G39400	OS01G0718300	56.0214	0.0155213	0.0169398
glycolipid binding	AT4G39670	OS03G0710700	54.7414	0.00130983	0.0387141
SQD2	AT5G01220	OS01G0142300	72.0183	0.0452869	0.0110754
auxin efflux carrier	AT5G01990	OS01G0818000	62.037	0.0256891	0.0162452
DIE2	AT5G02410	OS04G0503700	46.6801	0.0268294	0.0139272
zinc finger	AT5G03200	OS10G0204100	41.6471	0.0407813	0.0111164
kinase	AT5G03320	OS10G0442800	52.7115	0.0312025	0.0376289
PU1	AT5G04360	OS04G0164900	65.4054	0.0419088	0.0369046
PPR	AT5G04810	OS04G0684500	54.0511	0.0156273	0.0200648
myb	AT5G05790	OS01G0853700	38.796	0.0246948	0.0157306
UGT76C1	AT5G05870	OS07G0241800	37.7729	0.0488656	0.0289144
UGT76C1	AT5G05870	OS07G0241800	37.7729	0.0488656	0.036019
NHL3	AT5G06320	OS01G0864300	26.1411	0.00153351	0.0403984
HIN1	AT5G06330	OS04G0416700	36.3636	0.0122401	0.0126508
HIN1	AT5G06330	OS02G0538700	36.6071	0.0122401	0.0194206
PP2C	AT5G06750	OS02G0685600	68.2171	0.0242653	0.00917259
-	AT5G06830	OS06G0320100	56.9892	0.0367147	0.0389831
PGIP1	AT5G06860	OS05G0104700	36.409	0.000892482	0.042083
PGIP1	AT5G06860	OS05G0104700	36.409	0.000892482	0.042962
PGIP2	AT5G06870	OS05G0104700	35.9102	0.00386594	0.042083
PGIP2	AT5G06870	OS05G0104700	35.9102	0.00386594	0.042962
TF	AT5G07580	OS04G0547600	19.2073	0.00526649	0.0157896
GRAM	AT5G08350	OS04G0526800	40.7725	0.000234641	0.0414599
SRK2G	AT5G08590	OS04G0432000	75.4875	0.0161177	0.0207655
SRK2G	AT5G08590	OS01G0869900	65.0485	0.0161177	0.0329356
SRK2G	AT5G08590	OS02G0551100	72.8767	0.0161177	0.0384864
U-box	AT5G09800	OS05G0439400	25.6637	0.0382942	0.0356989
-	AT5G10695	OS08G0230600	30.8642	0.00186848	0.0265616
embryo-abundant	AT5G10830	OS01G0716500	45.6274	0.0368478	0.0102231
embryo-abundant	AT5G10830	OS01G0716500	45.6274	0.0368478	0.0118977
NADP-ME2	AT5G11670	OS01G0188400	68.5446	0.0381583	0.0104605
Ndr	AT5G11790	OS06G0563000	70.1149	0.00969612	0.0272305
-	AT5G12170	OS01G0955700	50.7973	0.0097655	0.0311584
-	AT5G12170	OS01G0955700	50.7973	0.0331719	0.0311584
UDP-glucose 6-dehydrogenase	AT5G15490	OS03G0757900	87.9167	0.0308101	0.0466647
TRXF2	AT5G16400	OS01G0913000	54.5455	0.0178383	0.0194206
IPP1	AT5G16440	OS05G0413400	67.2355	0.0450932	0.0183562
LRR1	AT5G16590	OS03G0223000	46.8148	0.0230849	0.0423826
DNAJ	AT5G16650	OS02G0693200	65.2893	0.0105952	0.0266633
ANAC087	AT5G18270	OS03G0327100	41.6201	0.00649997	0.0464642
-	AT5G19855	OS07G0569600	47.1503	0.0165705	0.0252045
SPX1	AT5G20150	OS02G0202200	52.8571	0.008306	0.00200559
SPX1	AT5G20150	OS06G0603600	58.6441	0.008306	0.0159972
DIN10	AT5G20250	OS06G0172800	52.4324	0.00548455	0.0367056
SPS1F	AT5G20280	OS02G0184400	58.457	0.0105904	0.0348795
MGD2	AT5G20410	OS08G0299400	71.3235	0.0179558	0.00757156
-	AT5G22270	OS04G0684600	34.5679	0.000401108	0.0200648
-	AT5G22270	OS01G0863500	26.3566	0.000401108	0.0212678
FSD3	AT5G23310	OS06G0143000	61.1765	0.0379094	0.0480005
-	AT5G24460	OS06G0712200	44.3983	0.0216963	0.0125922
BZO2H2	AT5G24800	OS02G0175100	31.4079	0.000832224	0.0454855
EBF2	AT5G25350	OS06G0605900	41.6268	0.0164778	0.0407148
CBP60G	AT5G26920	OS11G0669100	15.0485	0.0108814	0.0181885
CBP60G	AT5G26920	OS03G0778000	15.1515	0.0108814	0.0200313
CBP60G	AT5G26920	OS12G0556300	19.0955	0.0108814	0.0495704
zinc finger	AT5G27420	OS02G0759400	24.4851	0.00101586	0.00728538
zinc finger	AT5G27420	OS06G0218300	26.0181	0.00101586	0.0295015
zinc finger	AT5G27420	OS03G0188200	27.1955	0.00101586	0.0315536
-	AT5G28500	OS10G0445600	41.1514	0.0176057	0.0454123
oxidoreductase	AT5G38900	OS03G0598900	49.4297	0.0294951	0.0364565
transferase/ transferase, transferring acyl groups other than amino-acyl groups	AT5G39050	OS02G0820400	31.5673	0.00383087	0.0419668
UDP-glucose 6-dehydrogenase	AT5G39320	OS03G0757900	86.6667	0.0476905	0.0466647
CDF2	AT5G39660	OS01G0277500	30.5054	0.0105904	0.0385859
pectinase	AT5G41870	OS01G0618900	62.614	0.00713536	0.0102713
pectinase	AT5G41870	OS02G0256100	58.2393	0.00713536	0.0424689
SPL2	AT5G43270	OS02G0174100	35.0598	0.0209551	0.039214
COP1-interacting	AT5G43310	OS07G0445600	32.5553	0.000494995	0.0133518
FAD-binding	AT5G44400	OS02G0235900	38.9771	0.0351902	0.0207655
kinase	AT5G46080	OS08G0376600	33.0749	0.0424468	0.0234277
TPT	AT5G46110	OS05G0241200	67.3267	0.0169084	0.0200297
-	AT5G46230	OS06G0538900	32.1053	0.00380022	0.00791493
AGD9	AT5G46750	OS10G0574800	60.4423	0.0446733	0.0443186
ERF1-1	AT5G47880	OS07G0587400	85.8124	0.0422746	0.0133449
PAT1	AT5G48150	OS07G0583600	50.9191	0.00550241	0.0273652
NSP5	AT5G48180	OS09G0249000	49.3976	0.00119045	0.0118281
aspartic-type endopeptidase	AT5G48430	OS01G0937600	23.3032	0.0128265	0.0219586
aspartic-type endopeptidase	AT5G48430	OS01G0937200	30.3483	0.0128265	0.0366563
xanthine/uracil permease	AT5G49990	OS03G0823800	74.8582	0.0070633	0.0246607
zinc finger	AT5G50020	OS05G0436900	54.7786	0.042077	0.00982937
4-alpha-hydroxytetrahydrobiopterin dehydratase	AT5G51110	OS03G0100200	45.8128	0.00573754	0.0382978
AP2	AT5G51190	OS04G0547600	25.3049	0.0122401	0.0157896
HSP23.5-M	AT5G51440	OS02G0758000	37.7273	0.00666224	0.00223143
agenet	AT5G52070	OS05G0140600	26.6667	0.046142	0.0142922
DFL1	AT5G54510	OS01G0221100	34.1991	0.0141225	0.0214643
DFL1	AT5G54510	OS01G0221100	34.1991	0.0141225	0.0215287
-	AT5G55210	OS08G0338600	13.8075	0.0355327	0.00911394
kinase	AT5G55560	OS07G0584100	61.1621	0.0366879	0.0383966
-	AT5G56980	OS05G0540900	19.6809	0.00184905	0.00777939
CYP81F2	AT5G57220	OS03G0760200	41.3255	0.0143166	0.0407963
-	AT5G57345	OS06G0694800	51.3228	0.0334744	0.0372977
-	AT5G57510	OS08G0448100	29.878	0.00713536	0.0131188
kinase	AT5G58150	OS08G0276400	43.289	0.0140235	0.0316676
malate dehydrogenase (NADP), chloroplast	AT5G58330	OS08G0562100	75.7506	0.00647056	0.012173
PRLI-interacting factor	AT5G58720	OS01G0225100	19.5035	0.0126933	0.0278114
HSP18.2	AT5G59720	OS03G0266300	70.1863	0.0212295	0.0219958
ZAT12	AT5G59820	OS03G0820400	29.8611	0.00195118	0.0158109
ZAT12	AT5G59820	OS03G0820300	28.8235	0.00195118	0.0328222
ZAT12	AT5G59820	OS01G0839100	28.655	0.00195118	0.0353662
gibberellin-regulated	AT5G59845	OS03G0760800	55.914	0.00968406	0.0360955
ADF4	AT5G59890	OS05G0113400	81.1594	0.00882658	0.032478
ADF4	AT5G59890	OS05G0113400	81.1594	0.00882658	0.041193
PRR3	AT5G60100	OS07G0695100	28.5714	0.0249998	0.0164619
protein binding	AT5G61240	OS03G0211900	72.2388	0.028257	0.00849475
myb	AT5G61620	OS08G0151000	27.7286	0.000463733	0.00849475
-	AT5G61820	OS08G0538600	51.4151	0.00101762	0.00612841
FL5-2I22	AT5G62350	OS04G0106000	32.2034	0.00315292	0.0349173
FL5-2I22	AT5G62350	OS06G0711800	36.5	0.00315292	0.0427063
AHA11	AT5G62670	OS07G0191200	87.2518	0.0465803	0.00573428
AHA11	AT5G62670	OS12G0638700	89.5397	0.0465803	0.026726
POT	AT5G62680	OS12G0638300	50.2555	0.0126278	0.0416034
oxidoreductase	AT5G63620	OS08G0109200	67.0561	0.00767519	0.0382978
SRK2H	AT5G63650	OS04G0432000	77.4373	0.00367664	0.0207655
SRK2H	AT5G63650	OS01G0869900	67.9612	0.00367664	0.0329356
SRK2H	AT5G63650	OS02G0551100	73.9726	0.00367664	0.0384864
MUM2	AT5G63800	OS05G0428100	48.7053	0.00962486	0.0444975
dentin sialophosphoprotein	AT5G64170	OS03G0387900	20.4545	0.0247475	0.00631673
dentin sialophosphoprotein	AT5G64170	OS03G0387900	20.4545	0.0247475	0.0110868
dentin sialophosphoprotein	AT5G64170	OS03G0387900	20.4545	0.0247475	0.0113993
dentin sialophosphoprotein	AT5G64170	OS03G0387900	20.4545	0.0247475	0.0209345
ATH13	AT5G64940	OS02G0575500	73.9187	0.00246412	0.00848886
scarecrow TF	AT5G66770	OS03G0723000	47.7509	0.00220666	0.0476646

## Sheet: Fl vs Fl-1xg-centrifuge
Supplementary Table 5.3
Significantly differentially expressed genes (p<0.05) in flight samples vs 1xg (centrifuge) in flight controls of Arabidopsis in cell cultures grown on the Shnezhou 8 mission. Predicted Rice orthologs are shown along with adjusted p-values corrected for multiple testing (Q-value) for both the Arabidopsis and rice genes. Note some Arabidopsis genes have multiple predicted ortohologs in rice
Arabidopsis Gene Name	Arabidopsis Locus ID	Rice Ortholog Gene_id	% identity of rice ortholog to Arabidopsis gene	adj.P-Val for Arabidopsis data	adj.P.Val for Rice data
-	AT1G69890	OS07G0191600	36.409	0.000109865	0.0883294
hydrolase	AT2G32150	OS03G0701200	46.0145	0.000139	0.04135
glucosyl transferase	AT3G11340	OS03G0824600	29.7741	0.000199237	0.0997977
glucosyl transferase	AT3G11340	OS11G0441500	37.1795	0.000199237	0.0645999
glucosyl transferase	AT3G11340	OS07G0241800	37.5546	0.000199237	0.0289144
glucosyl transferase	AT3G11340	OS07G0241800	37.5546	0.000199237	0.036019
glucosyl transferase	AT3G11340	OS07G0241500	38.0457	0.000199237	0.129458
XTR4	AT1G32170	OS10G0577500	46.13	0.000199237	0.689139
XTR4	AT1G32170	OS03G0854600	48.7535	0.000199237	0.349801
XTR4	AT1G32170	OS02G0696500	53.8462	0.000199237	0.0832883
IVD	AT3G45300	OS05G0125500	82.1516	0.000217465	0.0656729
IVD	AT3G45300	OS05G0125500	82.1516	0.000217465	0.10752
THA1	AT1G08630	OS04G0516600	63.7097	0.000234641	0.391084
RMA1	AT4G03510	OS02G0639800	24.4755	0.000290434	0.0392277
RMA1	AT4G03510	OS02G0639800	24.4755	0.000290434	0.0457301
RMA1	AT4G03510	OS02G0639800	24.4755	0.000290434	0.0727704
RMA1	AT4G03510	OS02G0639800	24.4755	0.000290434	0.117653
RMA1	AT4G03510	OS02G0639800	24.4755	0.000290434	0.191765
RMA1	AT4G03510	OS04G0530500	26.087	0.000290434	0.0381678
auxin-responsive	AT2G46690	OS06G0714300	36.8794	0.000294158	0.873044
kinase	AT1G16260	OS12G0615300	28.8204	0.00030487	0.0157896
kinase	AT1G16260	OS09G0471400	41.3706	0.00030487	0.129218
-	AT2G15695	OS11G0614900	47.6793	0.000335945	0.0974759
-	AT5G22270	OS01G0863500	26.3566	0.000401108	0.0212678
-	AT5G22270	OS02G0536500	27.6423	0.000401108	0.19461
-	AT5G22270	OS04G0415000	30.1724	0.000401108	0.14121
-	AT5G22270	OS04G0684600	34.5679	0.000401108	0.0200648
SRG2	AT3G60140	OS04G0474500	43.3447	0.000432484	0.0539506
myb	AT5G61620	OS08G0151000	27.7286	0.000463733	0.00849475
COP1-interacting	AT5G43310	OS07G0445600	32.5553	0.000494995	0.0133518
-	AT3G15450	OS04G0679400	60.0775	0.000593741	0.0924898
DMR6	AT5G24530	OS03G0122300	63.1579	0.000597038	0.227951
-	AT1G77890	OS07G0626300	38.4259	0.000597038	0.0151984
AAA-type ATPase	AT3G28540	OS12G0467700	41.3725	0.000619621	0.806353
AAA-type ATPase	AT3G28540	OS12G0468000	41.3725	0.000619621	0.806353
AAA-type ATPase	AT3G28540	OS07G0192000	42.6357	0.000619621	0.0197908
AAA-type ATPase	AT3G28540	OS03G0802500	43.6538	0.000619621	0.215518
BCAT-2	AT1G10070	OS03G0231600	55.4217	0.000619621	0.0946257
ACO1	AT2G19590	OS01G0580500	46.789	0.000632277	0.222135
PRR5	AT5G24470	OS09G0532400	29.8555	0.000670304	0.0878562
AZF2	AT3G19580	OS03G0437200	9.54545	0.000701872	0.167334
AZF2	AT3G19580	OS12G0583700	39.2713	0.000701872	0.0476591
BZO2H2	AT5G24800	OS06G0662200	29.4915	0.000832224	0.110584
BZO2H2	AT5G24800	OS02G0175100	31.4079	0.000832224	0.0454855
BZO2H2	AT5G24800	OS02G0266800	32.2148	0.000832224	0.111833
PGIP1	AT5G06860	OS05G0104700	36.409	0.000892482	0.042083
PGIP1	AT5G06860	OS05G0104700	36.409	0.000892482	0.042962
stress-responsive	AT4G37220	OS03G0767800	53.3333	0.000892482	0.0770115
RCA	AT2G39730	OS11G0707000	79.9076	0.000947864	0.986358
zinc finger	AT5G27420	OS02G0572300	18.4211	0.00101586	0.091012
zinc finger	AT5G27420	OS06G0218300	26.0181	0.00101586	0.0295015
zinc finger	AT5G27420	OS03G0188200	27.1955	0.00101586	0.0315536
zinc finger	AT5G27420	OS02G0572200	27.5072	0.00101586	0.151848
kinase	AT2G36350	OS12G0480200	65.5814	0.00104694	0.0708391
UGT73B1	AT4G34138	OS01G0597800	39.4366	0.00107759	0.417299
-	AT4G32870	OS01G0198900	23.6111	0.00111881	0.00571908
-	AT4G32870	OS01G0198900	23.6111	0.00111881	0.00742267
PDCB2	AT5G08000	OS03G0756300	41.7143	0.00113168	0.0540545
NSP5	AT5G48180	OS09G0249000	49.3976	0.00119045	0.0118281
kinase	AT5G16900	OS01G0810800	22.412	0.00123166	0.494387
kinase	AT5G16900	OS12G0567500	33.4702	0.00123166	0.942704
EST3	AT2G47800	OS04G0209300	50.7275	0.00130983	0.691277
EST3	AT2G47800	OS04G0209200	59.0767	0.00130983	0.0637576
-	AT3G61870	OS02G0122500	60.5735	0.0013914	0.0149563
kinase	AT1G78530	OS01G0247500	61.1429	0.00147173	0.77701
NHL3	AT5G06320	OS01G0864300	26.1411	0.00153351	0.0403984
NHL3	AT5G06320	OS12G0159000	28.125	0.00153351	0.0760275
GSTU11	AT1G69930	OS10G0525400	39.3443	0.00168051	0.48543
GSTU11	AT1G69930	OS10G0481300	44.6078	0.00168051	0.12724
AP2	AT1G22985	OS01G0657400	19.863	0.00180356	0.536263
GLR2.5	AT5G11210	OS06G0190800	37.0732	0.00184421	0.0937176
-	AT5G10695	OS08G0230600	30.8642	0.00186848	0.0265616
integral membrane	AT5G54980	OS02G0219900	28.3582	0.00195118	0.111513
PP2-A13	AT3G61060	OS02G0224900	35.443	0.00196214	0.012351
PP2-A13	AT3G61060	OS02G0224900	35.443	0.00196214	0.0897906
PP2-A13	AT3G61060	OS10G0522400	46.6667	0.00196214	0.0310732
PP2-A13	AT3G61060	OS04G0571300	53.9474	0.00196214	0.0514653
PP2-A13	AT3G61060	OS03G0116700	54.8822	0.00196214	0.082566
-	AT2G32160	OS05G0511300	51.6194	0.00204049	0.100903
anac032	AT1G77450	OS01G0884300	51.8152	0.00232419	0.214289
embryo-abundant	AT4G22530	OS01G0716500	45.2471	0.0025002	0.0102231
embryo-abundant	AT4G22530	OS01G0716500	45.2471	0.0025002	0.0118977
CBS	AT4G27460	OS04G0679600	23.0198	0.00255845	0.0909631
thioredoxin	AT1G07700	OS02G0567100	48.5981	0.00256504	0.116307
HSFB2A	AT5G62020	OS09G0526600	29.2952	0.00267699	0.112598
HSFB2A	AT5G62020	OS08G0546800	33.5897	0.00267699	0.318138
PAP14	AT2G46880	OS09G0533300	46.9849	0.00276227	0.207501
SDR	AT2G37540	OS01G0151700	63.5514	0.00276227	0.0799926
kinase	AT1G80640	OS08G0285600	41.9525	0.00281376	0.0157896
tic20-IV	AT4G03320	OS02G0614400	29.572	0.00286303	0.0586472
tic20-IV	AT4G03320	OS07G0568500	29.7794	0.00286303	0.0731428
MATE efflux	AT5G52450	OS06G0707100	52.381	0.00290729	0.776784
AGT1	AT2G13360	OS08G0502700	84.0796	0.0029292	0.190835
RNS1	AT2G02990	OS08G0434100	53.7118	0.00297369	0.0093055
FL5-2I22	AT5G62350	OS04G0106000	32.2034	0.00315292	0.0349173
FL5-2I22	AT5G62350	OS06G0711800	36.5	0.00315292	0.0427063
-	AT5G40970	OS02G0509500	72.4638	0.0032186	0.269036
DNAJ	AT2G21510	OS05G0543700	64.497	0.00332555	0.0438064
DNAJ	AT2G21510	OS05G0543700	64.497	0.00332555	0.105239
MGDC	AT2G11810	OS02G0802700	59.1133	0.00348021	0.059532
MGDC	AT2G11810	OS08G0299400	70.098	0.00348021	0.00757156
SRK2H	AT5G63650	OS01G0869900	67.9612	0.00367664	0.0329356
SRK2H	AT5G63650	OS04G0691100	70.5405	0.00367664	0.96278
SRK2H	AT5G63650	OS02G0551100	73.9726	0.00367664	0.0384864
SRK2H	AT5G63650	OS04G0432000	77.4373	0.00367664	0.0207655
CYP72A15	AT3G14690	OS01G0627500	9.56023	0.00375379	0.00191364
CYP72A15	AT3G14690	OS01G0627600	44.5783	0.00375379	0.005295
CYP72A15	AT3G14690	OS01G0627400	46.9314	0.00375379	0.202291
CYP72A15	AT3G14690	OS01G0628700	49.7175	0.00375379	0.105163
CYP72A15	AT3G14690	OS01G0627800	50	0.00375379	0.00720461
CYP72A15	AT3G14690	OS05G0372300	50.4817	0.00375379	0.0294148
CYP72A15	AT3G14690	OS01G0728300	50.8671	0.00375379	0.083566
NC	AT5G06370	OS05G0440100	63.1387	0.00376561	0.500103
PGIP2	AT5G06870	OS05G0104700	35.9102	0.00386594	0.042083
PGIP2	AT5G06870	OS05G0104700	35.9102	0.00386594	0.042962
zinc ion binding	AT1G02750	OS12G0556100	26.1468	0.00425446	0.0327347
hydrolase	AT3G47050	OS05G0449600	63.8365	0.00434258	0.174438
YCF37	AT2G23670	OS02G0815300	30.9783	0.00434258	0.0201016
AAP3	AT1G77380	OS12G0181500	67.5789	0.00442235	0.244618
AAP3	AT1G77380	OS12G0181600	67.5789	0.00442235	0.0578933
AAP3	AT1G77380	OS11G0195600	68.2773	0.00442235	0.481419
-	AT1G52140	OS05G0200700	20	0.00446978	0.447913
TMP-C	AT4G00430	OS02G0823100	82.9861	0.00449785	0.0151913
TMP-C	AT4G00430	OS02G0666200	85.4671	0.00449785	0.287272
TMP-C	AT4G00430	OS04G0559700	87.8472	0.00449785	0.121164
ACHT4	AT1G08570	OS03G0326500	54.5455	0.00454182	0.0317432
ALMT1	AT1G08430	OS04G0417000	40	0.00473151	0.210643
-	AT1G63420	OS04G0534100	43.6073	0.00503778	0.109539
-	AT1G63420	OS04G0534100	43.6073	0.00503778	0.131758
aldo/keto reductase	AT1G10810	OS04G0339400	66.1972	0.00515021	0.318114
aldo/keto reductase	AT1G10810	OS04G0338100	68.75	0.00515021	0.26566
aldo/keto reductase	AT1G10810	OS04G0338100	68.75	0.00515021	0.303096
ACR3	AT1G76990	OS02G0555600	56.9647	0.00542137	0.0111164
ACR3	AT1G76990	OS02G0555600	56.9647	0.00542137	0.0396021
ACR3	AT1G76990	OS02G0555600	56.9647	0.00542137	0.0518078
CYP89A9	AT3G03470	OS10G0514500	29.5238	0.00546055	0.626853
CYP89A9	AT3G03470	OS10G0514700	38.8626	0.00546055	0.14859
CYP89A9	AT3G03470	OS10G0514901	41.2109	0.00546055	0.14859
CYP89A9	AT3G03470	OS10G0513900	42.3077	0.00546055	0.779784
-	AT3G51720	OS07G0677900	28.9017	0.00546055	0.0496103
PAT1	AT5G48150	OS07G0583600	50.9191	0.00550241	0.0273652
glycerophosphoryl diester phosphodiesterase	AT5G41080	OS08G0535700	45.0237	0.00550904	0.0641922
-	AT1G07040	OS10G0463800	56.3187	0.00550935	0.10939
DER2.1	AT4G21810	OS03G0852200	79.9197	0.00566228	0.206953
SDP1	AT5G04040	OS01G0762000	52.6052	0.00578925	0.103978
ATRR3	AT2G41310	OS01G0952500	53.4483	0.00579422	0.180352
GSTU12	AT1G69920	OS10G0525400	38.5246	0.0059305	0.48543
GSTU12	AT1G69920	OS10G0481300	40.6863	0.0059305	0.12724
mannose-P-dolichol synthase	AT1G20575	OS03G0824400	84.7737	0.00601444	0.0896949
HAT4	AT4G16780	OS10G0561800	39.8714	0.00636195	0.124646
HAT4	AT4G16780	OS04G0548700	46.1538	0.00636195	0.262926
ATPB	ATCG00480	OS10G0355800	90.4762	0.00644199	0.0804985
ATPB	ATCG00480	OS12G0207500	94.2197	0.00644199	0.0804985
malate dehydrogenase (NADP), chloroplast	AT5G58330	OS08G0562100	75.7506	0.00647056	0.012173
zinc finger	AT4G33940	OS03G0839000	32.4607	0.00659199	0.916434
HSP23.5-M	AT5G51440	OS02G0758000	37.7273	0.00666224	0.00223143
HGO	AT5G54080	OS06G0103300	72.3404	0.00682864	0.105115
PSBK	ATCG00070	OS11G0592350	68.8525	0.00687755	0.405106
MATE efflux	AT1G11670	OS07G0516600	55.9838	0.00703477	0.789073
MATE efflux	AT1G11670	OS03G0572900	61	0.00703477	0.140216
MATE efflux	AT1G11670	OS03G0571900	62.1154	0.00703477	0.158453
BGLU44	AT3G18080	OS03G0703100	55.6338	0.0080844	0.0910932
BGLU44	AT3G18080	OS03G0703000	60.9127	0.0080844	0.13545
CEN2	AT4G37010	OS10G0389000	53.4031	0.00842188	0.316821
fibrillin	AT2G46910	OS10G0509200	58.2456	0.00849627	0.469712
SRG3	AT3G02040	OS08G0535700	43.6019	0.00867946	0.0641922
SPP1	AT1G51420	OS01G0376700	56.5012	0.00869072	0.0470831
SPP1	AT1G51420	OS02G0143100	58.6288	0.00869072	0.0481256
SPP1	AT1G51420	OS05G0144900	59.5041	0.00869072	0.242715
-	AT1G56580	OS12G0563600	39.9015	0.00896518	0.802917
glutaredoxin	AT2G47880	OS01G0936000	38.4	0.00897718	0.296214
glutaredoxin	AT2G47880	OS11G0655900	46.2963	0.00897718	0.424956
-	AT4G25170	OS04G0550700	20.9677	0.00910392	0.204777
-	AT4G25170	OS02G0657700	24.4648	0.00910392	0.0352122
-	AT1G22030	OS02G0552200	34.5133	0.00915232	0.479455
AGO2	AT1G31280	OS04G0615800	0.573614	0.00923998	0.889814
AGO2	AT1G31280	OS04G0615700	38.2012	0.00923998	0.100545
3-ketoacyl-CoA thiolase	AT5G47720	OS01G0110400	71.875	0.00961866	0.0515346
MUM2	AT5G63800	OS05G0428100	48.7053	0.00962486	0.0444975
PSBI	ATCG00080	OS08G0433350	63.2653	0.00963945	0.43178
hydrolase	AT1G78210	OS10G0375700	35.7542	0.00973666	0.311333
hydrolase	AT1G78210	OS10G0375700	35.7542	0.00973666	0.695115
hydrolase	AT1G78210	OS10G0375700	35.7542	0.00973666	0.779837
UCC2	AT2G44790	OS04G0545600	31.4136	0.00973666	0.517081
-	AT1G21560	OS05G0423200	15.8568	0.00973666	0.0315487
chaperonin	AT2G38000	OS05G0316200	51.4957	0.0097495	0.153952
PRA1.G2	AT5G56230	OS03G0741600	17.9412	0.0097655	0.169994
BSK3	AT4G00710	OS04G0684200	61.2069	0.00990875	0.156425
kinase	AT4G23280	OS07G0538700	33.3333	0.0101132	0.121693
kinase	AT4G23280	OS07G0537600	34.712	0.0101132	0.0952209
kinase	AT4G23280	OS07G0541800	35.7466	0.0101132	0.682185
kinase	AT4G23280	OS07G0542400	36.6509	0.0101132	0.295449
kinase	AT4G23280	OS07G0542600	36.9885	0.0101132	0.51662
kinase	AT4G23280	OS07G0538200	37.0529	0.0101132	0.134594
kinase	AT4G23280	OS07G0540100	37.5	0.0101132	0.0317915
kinase	AT4G23280	OS10G0326900	48.3146	0.0101132	0.178016
kinase	AT4G23280	OS07G0538400	51.462	0.0101132	0.149759
kinase	AT2G42960	OS01G0664200	59.1463	0.0101745	0.174677
COL3	AT2G24790	OS10G0560400	19.1919	0.0102987	0.0657781
COL3	AT2G24790	OS10G0560400	19.1919	0.0102987	0.204126
COL3	AT2G24790	OS02G0610500	39.4578	0.0102987	0.327869
-	AT3G50910	OS02G0704600	35.7456	0.0102987	0.368328
-	AT3G52920	OS04G0408600	51.4793	0.0104456	0.128152
CDF2	AT5G39660	OS01G0277500	30.5054	0.0105904	0.0385859
GLY3	AT1G53580	OS01G0667200	59.0164	0.0105904	0.0126112
-	AT5G52420	OS10G0548100	36.1011	0.0110891	0.341531
proline-rich	AT1G64450	OS05G0238400	39.485	0.0112439	0.0433599
MATE efflux	AT1G66760	OS01G0504500	44.0239	0.011258	0.357533
MATE efflux	AT1G66760	OS05G0554000	46.3235	0.011258	0.0125922
MATE efflux	AT1G66760	OS05G0554000	46.3235	0.011258	0.425383
RAM1	AT4G15210	OS07G0543300	48.1481	0.011266	0.576814
PP2-A11	AT1G63090	OS02G0224900	36.2869	0.0114153	0.012351
PP2-A11	AT1G63090	OS02G0224900	36.2869	0.0114153	0.0897906
PP2-A11	AT1G63090	OS10G0522400	40	0.0114153	0.0310732
PP2-A11	AT1G63090	OS04G0571300	49.6711	0.0114153	0.0514653
PP2-A11	AT1G63090	OS03G0116700	50.8418	0.0114153	0.082566
TRXF1	AT3G02730	OS01G0913000	52.9412	0.0114153	0.0194206
C2	AT1G70810	OS07G0500300	41.0405	0.0115908	0.0457174
PAP23	AT4G13700	OS08G0280100	50	0.0117935	0.115092
SKP2A	AT1G21410	OS05G0425700	63.5638	0.0121795	0.0303144
protein transport sec61	AT1G78720	OS03G0213100	89.2632	0.0122401	0.418708
MIF	AT3G51660	OS11G0107500	42.9752	0.0122614	0.133656
MIF	AT3G51660	OS11G0107500	42.9752	0.0122614	0.136177
HIN1	AT2G35460	OS12G0159000	24.4792	0.0122917	0.0760275
HIN1	AT2G35460	OS01G0864300	30.2905	0.0122917	0.0403984
exostosin	AT4G16745	OS01G0640600	50.2994	0.0126782	0.0593841
FHA	AT5G47790	OS08G0326100	53.2066	0.0126782	0.117672
histone H2B	AT2G28720	OS01G0152700	100	0.0127889	0.416855
ferredoxin	AT1G32550	OS03G0685000	64.4809	0.0128644	0.164986
F-actin capping beta subunit	AT1G71790	OS03G0381200	76.1905	0.0132557	0.270608
DNA binding	AT1G12400	OS07G0573600	41.2214	0.0135254	0.134482
DNA binding	AT1G12400	OS05G0198700	65.4321	0.0135254	0.134482
protein binding	AT1G10650	OS02G0130300	35.5685	0.0135261	0.014023
protein binding	AT1G10650	OS02G0130300	35.5685	0.0135261	0.12708
TMK1	AT1G66150	OS03G0717000	62.2328	0.0135261	0.142895
TMK1	AT1G66150	OS03G0717000	62.2328	0.0135261	0.202068
-	AT1G47740	OS03G0198500	62.753	0.0138882	0.151539
zinc finger	AT5G42200	OS02G0178600	44	0.01395	0.191921
kinase	AT5G58150	OS08G0276400	43.289	0.0140235	0.0316676
DFL1	AT5G54510	OS01G0221100	34.1991	0.0141225	0.0214643
DFL1	AT5G54510	OS01G0221100	34.1991	0.0141225	0.0215287
SMO1-2	AT4G22756	OS03G0108500	53.3333	0.0141289	0.524762
SMO1-2	AT4G22756	OS10G0545200	63.1229	0.0141289	0.102879
RNS2	AT2G39780	OS01G0897200	33.8028	0.0151165	0.861362
RNS2	AT2G39780	OS01G0897300	43.8849	0.0151165	0.125792
kelch repeat	AT3G27220	OS04G0487100	61.4286	0.0154116	0.111411
PPR	AT5G04810	OS04G0684500	54.0511	0.0156273	0.0200648
transferase	AT5G42830	OS06G0103200	42.5163	0.0156692	0.103085
transferase	AT5G42830	OS11G0244100	42.6778	0.0156692	0.131674
RABH1e	AT5G10260	OS03G0191400	77.6744	0.0159994	0.141679
PIS2	AT4G38570	OS06G0492000	31.6456	0.0160258	0.0346149
C/VIF2	AT5G64620	OS12G0283400	28.0702	0.0161415	0.868192
PLPC	AT2G02710	OS01G0186200	46.3291	0.0161415	0.0811012
PRLI-interacting factor K	AT4G15420	OS01G0534800	60.8084	0.016198	0.0578455
PRLI-interacting factor K	AT4G15420	OS01G0534800	60.8084	0.016198	0.326441
ZIFL2	AT3G43790	OS01G0279400	50.9054	0.016198	0.188369
ZIFL2	AT3G43790	OS12G0132800	52.5532	0.016198	0.934629
ZIFL2	AT3G43790	OS11G0135000	53.617	0.016198	0.0606632
ZIFL2	AT3G43790	OS12G0133100	54.9801	0.016198	0.0632234
ZIFL2	AT3G43790	OS12G0133100	54.9801	0.016198	0.522491
ZIFL2	AT3G43790	OS11G0135900	56.1224	0.016198	0.522491
lipid-associated	AT2G22170	OS02G0753300	40.9326	0.0163639	0.126255
lipid-associated	AT2G22170	OS04G0456700	40.9326	0.0163639	0.0451564
EBF2	AT5G25350	OS06G0605900	41.6268	0.0164778	0.0407148
EBF2	AT5G25350	OS02G0200900	44.5455	0.0164778	0.170008
CPK13	AT3G51850	OS01G0832300	77.4955	0.0164872	0.0242921
CPK13	AT3G51850	OS01G0832300	77.4955	0.0164872	0.124548
CPK13	AT3G51850	OS05G0467000	78.0622	0.0164872	0.0217295
PII	AT4G01900	OS05G0133100	50	0.016512	0.0201391
dihydrolipoyl dehydrogenase	AT4G16155	OS01G0337900	78.2531	0.0165705	0.0457301
ADF9	AT4G34970	OS03G0243100	69.2308	0.0168852	0.060041
anac016	AT1G34180	OS09G0493700	20.9402	0.0172134	0.0236993
methyltransferase	AT3G01660	OS04G0481300	58.9552	0.0173342	0.0714293
isocitrate dehydrogenase	AT3G09810	OS01G0276100	76.5193	0.0176509	0.127096
MGD2	AT5G20410	OS02G0802700	60.8374	0.0179558	0.059532
MGD2	AT5G20410	OS08G0299400	71.3235	0.0179558	0.00757156
immunophilin	AT2G43560	OS08G0541400	57.4713	0.0186825	0.358888
TAF8	AT4G34340	OS03G0603300	31.5412	0.0187413	0.0510716
TAF8	AT4G34340	OS12G0574800	35.2459	0.0187413	0.162498
TAF8	AT4G34340	OS12G0574800	35.2459	0.0187413	0.166206
zinc finger	AT4G25610	OS09G0570200	34.4383	0.018863	0.0111164
zinc finger	AT4G25610	OS09G0570200	34.4383	0.018863	0.0757609
NRT2;1AT	AT1G08090	OS02G0112100	71.4822	0.0202944	0.0426027
NRT2;1AT	AT1G08090	OS02G0112100	71.4822	0.0202944	0.0549263
NRT2;1AT	AT1G08090	OS02G0112100	71.4822	0.0202944	0.0738849
NRT2;1AT	AT1G08090	OS02G0112600	71.4822	0.0202944	0.0426027
NRT2;1AT	AT1G08090	OS02G0112600	71.4822	0.0202944	0.0549263
nodulin	AT2G39210	OS12G0637700	51.5679	0.0204665	0.00441845
nodulin	AT2G39210	OS12G0637700	51.5679	0.0204665	0.0250777
oxidoreductase	AT1G28030	OS08G0417100	30.2548	0.0205665	0.153055
oxidoreductase	AT1G28030	OS08G0417000	30.5466	0.0205665	0.0759955
-	AT3G09085	OS03G0265800	50	0.0206168	0.299137
IAA17	AT1G04250	OS12G0601300	49.0975	0.0206641	0.0180827
-	AT1G09310	OS12G0563600	42.3645	0.0209317	0.802917
EXPA6	AT2G28950	OS03G0822000	77.2727	0.0212076	0.0341219
HSP18.2	AT5G59720	OS03G0266300	70.1863	0.0212295	0.0219958
HSP18.2	AT5G59720	OS03G0267000	72.0497	0.0212295	0.0800834
HSP18.2	AT5G59720	OS03G0267000	72.0497	0.0212295	0.12092
ACX2	AT5G65110	OS11G0605500	74.392	0.0214774	0.0655893
pectate lyase	AT3G09540	OS01G0546800	57.967	0.0215578	0.271769
-	AT1G77220	OS05G0516900	61.0656	0.0215578	0.0153555
AGT3	AT2G38400	OS05G0475400	74.9361	0.0215687	0.946371
Got1-like	AT3G03180	OS10G0337600	71.4286	0.0215918	0.173209
Got1-like	AT3G03180	OS10G0337600	71.4286	0.0215918	0.195631
Got1-like	AT3G03180	OS03G0209400	75.7143	0.0215918	0.111769
hydrolase	AT5G10700	OS04G0605200	55.6757	0.0215918	0.0847989
PHS2	AT3G46970	OS01G0851700	79.0725	0.0216963	0.0128853
-	AT5G24460	OS06G0712200	44.3983	0.0216963	0.0125922
-	AT3G15095	OS06G0352900	24.6154	0.0221386	0.221005
TIC55	AT2G24820	OS02G0792800	62.5232	0.022226	0.130584
KCS20	AT5G43760	OS11G0591200	72.4537	0.0224365	0.632627
ATHB12	AT3G61890	OS04G0541700	31.746	0.022671	0.180648
pyrophosphate-dependent 6-phosphofructose-1-kinase	AT1G76550	OS02G0714200	77.6337	0.0230849	0.0335495
hydrolase	AT1G32860	OS06G0131500	42.3163	0.0231689	0.21443
hydrolase	AT1G32860	OS03G0246100	42.5581	0.0231689	0.320539
exostosin	AT1G74680	OS08G0438600	43.1095	0.0237069	0.297777
AAA-type ATPase	AT1G64110	OS05G0584600	61.5205	0.0241297	0.0308385
AAA-type ATPase	AT1G64110	OS01G0226400	68.8095	0.0241297	0.0490954
PP2C	AT5G06750	OS02G0685600	68.2171	0.0242653	0.00917259
myb	AT5G05790	OS05G0449900	35.873	0.0246948	0.0985242
myb	AT5G05790	OS01G0853700	38.796	0.0246948	0.0157306
emb1997	AT2G28880	OS06G0699700	65.0602	0.0247211	0.1402
EF-P	AT3G08740	OS11G0116400	62.4454	0.0249842	0.0804985
EF-P	AT3G08740	OS12G0115900	62.8821	0.0249842	0.0804985
-	AT3G56270	OS07G0677900	23.8921	0.0249998	0.0496103
DNA binding	AT5G23480	OS01G0884500	14.1256	0.0250491	0.0855198
calmodulin-binding	AT5G57580	OS02G0177800	59.9359	0.0256891	0.149223
NDB2	AT4G05020	OS08G0141400	32.493	0.0256891	0.0530621
-	AT2G41810	OS03G0807700	52.9262	0.0256998	0.15825
senescence/dehydration-associated	AT4G35985	OS06G0717100	47.2554	0.0260327	0.0920664
hydrolase	AT1G07230	OS03G0826600	69.5413	0.0260912	0.143854
ketose-bisphosphate aldolase class-II	AT1G18270	OS06G0258900	64.1715	0.0264856	0.069805
-	AT1G15430	OS01G0612600	25.4601	0.0271917	0.917294
HVA22D	AT4G24960	OS11G0498600	46.0526	0.0277974	0.467378
bHLH	AT1G03040	OS03G0797600	52.0408	0.0278877	0.0238527
bHLH	AT1G03040	OS03G0797600	52.0408	0.0278877	0.0972604
germin-like	AT3G05950	OS12G0154700	57.2052	0.0282395	0.226472
germin-like	AT3G05950	OS08G0189200	58.2222	0.0282395	0.156308
pectinase	AT3G61490	OS03G0124900	58.952	0.0282771	0.465842
binding	AT5G49960	OS01G0870100	55.6477	0.0284464	0.101666
PLE2	AT3G25860	OS09G0408600	60.8782	0.0284733	0.172345
C2	AT1G70790	OS07G0500300	42.7746	0.0287957	0.0457174
CYP81D5	AT4G37320	OS12G0582666	35.2632	0.0290461	0.426725
CYP81D5	AT4G37320	OS03G0760200	42.3002	0.0290461	0.0407963
kinase	AT5G65600	OS01G0779300	39.7989	0.0293187	0.12131
PUX5	AT4G15410	OS06G0634600	35.9202	0.0293187	0.488725
FUC1	AT2G28100	OS04G0560400	55.0388	0.0293654	0.00676833
BTI2	AT4G11220	OS06G0503400	50.9434	0.0294951	0.340759
PGDH	AT1G17745	OS08G0447000	69.7262	0.0302269	0.0443027
PGDH	AT1G17745	OS08G0447000	69.7262	0.0302269	0.0932989
-	AT2G21640	OS10G0557800	29.1667	0.030529	0.105229
-	AT3G45050	OS06G0731300	42.4242	0.030545	0.304166
AGAL1	AT5G08380	OS07G0452100	57.7566	0.030961	0.17897
RLP3	AT1G17250	OS06G0692100	24.3553	0.0314243	0.0533362
RLP3	AT1G17250	OS06G0691800	26.8293	0.0314243	0.301004
-	AT5G43830	OS03G0744600	57.7689	0.0324601	0.108243
ATP binding	AT1G06190	OS03G0183100	32.5333	0.0324611	0.201169
ADR1-L3	AT5G47280	OS12G0586000	45.7571	0.0328658	0.124022
TF	AT4G00390	OS09G0451700	22.7778	0.0328763	0.0986121
protein binding	AT1G44910	OS01G0532200	54.3897	0.0331719	0.0676965
rcd1-like cell differentiation	AT3G20800	OS03G0784800	70	0.0331719	0.0935079
rcd1-like cell differentiation	AT3G20800	OS04G0613400	74.2331	0.0331719	0.367762
protein kinase C substrate, heavy chain	AT2G42390	OS01G0752400	33.8624	0.0331951	0.0475857
PAB5	AT1G71770	OS06G0589700	44.8622	0.0333797	0.143854
TAF2	AT1G73960	OS09G0410300	29.4643	0.0333797	0.216462
TAF2	AT1G73960	OS09G0410300	29.4643	0.0333797	0.329998
FH2	AT2G43800	OS01G0897700	50	0.0334744	0.0201633
RNA-binding cp33	AT1G01080	OS08G0117100	36.0502	0.0337989	0.037589
-	AT2G32380	OS03G0646400	44.5783	0.0337989	0.0251711
-	AT2G32380	OS03G0646400	44.5783	0.0337989	0.0474396
-	AT2G32380	OS03G0646400	44.5783	0.0337989	0.0683183
-	AT2G32380	OS07G0458500	47.8788	0.0337989	0.0544208
ADT4	AT3G44720	OS04G0406600	63.5321	0.033836	0.163067
ADT4	AT3G44720	OS09G0566050	65.1106	0.033836	0.0612653
ADT4	AT3G44720	OS09G0565700	65.8354	0.033836	0.0612653
ADT4	AT3G44720	OS09G0565700	65.8354	0.033836	0.280048
binding	AT1G27150	OS03G0689900	52.2013	0.0341611	0.223181
-	AT1G78110	OS09G0370000	34.7594	0.0342829	0.323349
PTAC13	AT3G09210	OS03G0825500	40	0.0344185	0.101298
RING1B	AT1G03770	OS01G0796700	31.9018	0.0348282	0.02622
STL2P	AT2G01470	OS11G0610700	39.1089	0.0348282	0.203314
-	AT1G27510	OS01G0107900	44.9761	0.0350531	0.0300205
-	AT1G27510	OS01G0107900	44.9761	0.0350531	0.0461997
-	AT2G40480	OS07G0677900	27.7457	0.0350531	0.0496103
MPK17	AT2G01450	OS06G0708000	57.931	0.0352709	0.0658231
MPK17	AT2G01450	OS01G0643800	64.2715	0.0352709	0.0470691
IQD28	AT1G14380	OS01G0716200	29.0941	0.0353782	0.0194613
IQD28	AT1G14380	OS05G0535900	29.9652	0.0353782	0.0605869
ribosome	AT2G28830	OS03G0275900	50	0.0353894	0.195729
ribosome	AT2G28830	OS03G0275900	50	0.0353894	0.249548
ribosome	AT2G28830	OS12G0570000	59.1876	0.0353894	0.188979
CYP72A13	AT3G14660	OS01G0627500	9.36903	0.0356788	0.00191364
CYP72A13	AT3G14660	OS01G0627600	43.8554	0.0356788	0.005295
CYP72A13	AT3G14660	OS01G0627400	49.278	0.0356788	0.202291
CYP72A13	AT3G14660	OS01G0628700	49.3409	0.0356788	0.105163
CYP72A13	AT3G14660	OS01G0728300	49.5183	0.0356788	0.083566
CYP72A13	AT3G14660	OS05G0372300	49.9037	0.0356788	0.0294148
CYP72A13	AT3G14660	OS01G0627800	50.9363	0.0356788	0.00720461
MYB124	AT1G14350	OS07G0627300	30.855	0.0360818	0.547421
zinc finger	AT2G17730	OS08G0550400	39.6154	0.0361817	0.230254
zinc finger	AT2G17730	OS07G0479100	40.5622	0.0361817	0.095931
zinc finger	AT2G17730	OS10G0544600	46.3519	0.0361817	0.867827
phosphatidylinositol 3- and 4-kinase	AT1G13640	OS09G0474800	55	0.0363499	0.113515
phosphatidylinositol 3- and 4-kinase	AT1G13640	OS04G0668700	59.3388	0.0363499	0.118064
MIPS1	AT4G39800	OS10G0369900	80.943	0.0364006	0.150219
-	AT3G25130	OS11G0458100	18.9112	0.0367147	0.0818078
-	AT3G25130	OS11G0458100	18.9112	0.0367147	0.589247
kinase	AT1G51860	OS01G0810800	22.412	0.0369313	0.494387
kinase	AT1G51860	OS12G0567500	33.6756	0.0369313	0.942704
SOM4	AT5G66750	OS09G0442700	58.5799	0.0372055	0.252541
-	AT1G04960	OS09G0482740	43.0818	0.0372347	0.371236
xanthine/uracil permease	AT3G10960	OS05G0332600	68.523	0.0373949	0.0380118
PAZ	AT1G31290	OS04G0615800	0.573614	0.0379094	0.889814
PAZ	AT1G31290	OS04G0615700	39.7486	0.0379094	0.100545
TET2	AT2G19580	OS06G0572400	55.8824	0.0382462	0.048161
U-box	AT5G09800	OS05G0439400	25.6637	0.0382942	0.0356989
zinc finger	AT5G57660	OS10G0560400	21.8855	0.0384505	0.0657781
zinc finger	AT5G57660	OS10G0560400	21.8855	0.0384505	0.204126
zinc finger	AT5G57660	OS02G0610500	42.1687	0.0384505	0.327869
protein binding	AT1G24440	OS01G0905700	45.6349	0.0388203	0.0261474
hydrolase	AT1G72700	OS06G0565900	74.0798	0.0394706	0.168626
ZIGA4	AT1G08680	OS03G0323500	34.4444	0.0394706	0.005295
POP2	AT3G22200	OS08G0205900	72.3529	0.0397383	0.065336
CYP81D1	AT3G28740	OS12G0582666	37.3684	0.0399978	0.426725
CYP81D1	AT3G28740	OS03G0760200	39.3762	0.0399978	0.0407963
MHX1	AT2G47600	OS02G0644900	57.2687	0.0399978	0.144691
MHX1	AT2G47600	OS11G0660000	66.5392	0.0399978	0.0941123
MHX1	AT2G47600	OS11G0660000	66.5392	0.0399978	0.144691
GMD1	AT5G66280	OS06G0137700	74.6667	0.0404951	0.291308
scpl3	AT1G73280	OS10G0101200	40.0424	0.0415304	0.185533
scpl3	AT1G73280	OS10G0101200	40.0424	0.0415304	0.289503
scpl3	AT1G73280	OS11G0643400	42.3459	0.0415304	0.487674
scpl3	AT1G73280	OS11G0432900	42.5887	0.0415304	0.249077
scpl3	AT1G73280	OS12G0581400	42.5974	0.0415304	0.220333
scpl3	AT1G73280	OS11G0461000	42.7699	0.0415304	0.735902
transducin	AT1G80670	OS01G0635400	73.8372	0.0417781	0.00913663
TF	AT3G06590	OS03G0311600	41.4634	0.0417879	0.0592767
TPS4	AT4G27550	OS05G0518600	59.9138	0.0419088	0.0514263
VAMP728	AT3G24890	OS03G0165800	27.3543	0.0419622	0.0382978
ERF1-1	AT5G47880	OS01G0939500	83.2569	0.0422746	0.289836
ERF1-1	AT5G47880	OS07G0587400	85.8124	0.0422746	0.0133449
PDI10	AT1G04980	OS09G0451500	73.2426	0.0424331	0.684157
prephenate dehydrogenase	AT1G15710	OS06G0708832	53.2578	0.0432413	0.324618
kinase	AT1G01220	OS03G0115100	62.9664	0.043626	0.4427
-	AT1G16000	OS12G0556400	60.9756	0.0436381	0.370961
DPBF5	AT4G34000	OS06G0211200	48.7654	0.0440236	0.311716
GI	AT1G22770	OS01G0182600	68.4483	0.0440626	0.199244
XTH27	AT2G01850	OS10G0117000	46.2687	0.0440656	0.111428
XTH27	AT2G01850	OS03G0239000	55.6213	0.0440656	0.292763
-	AT4G02880	OS05G0394900	16.3539	0.0441053	0.0538809
-	AT4G02880	OS05G0394900	16.3539	0.0441053	0.226312
calcium ion binding	AT3G25600	OS05G0577500	57.2254	0.0443176	0.00580646
TLP11	AT5G18680	OS03G0351400	59.4595	0.0443972	0.682311
VTI13	AT3G29100	OS01G0560200	49.7738	0.0443972	0.178212
VTI13	AT3G29100	OS01G0707300	55.6561	0.0443972	0.119494
VTI13	AT3G29100	OS01G0707300	55.6561	0.0443972	0.39088
-	AT5G40960	OS01G0849500	64.7059	0.0449967	0.540809
VAMP711	AT4G32150	OS02G0803600	68.1416	0.0451666	0.206403
VAMP711	AT4G32150	OS06G0174400	72.8507	0.0451666	0.0360068
VAMP711	AT4G32150	OS06G0174400	72.8507	0.0451666	0.13039
SQD2	AT5G01220	OS03G0265100	67.7108	0.0452869	0.655377
SQD2	AT5G01220	OS01G0142300	72.0183	0.0452869	0.0110754
glycoprotein	AT2G39050	OS01G0104400	45.8955	0.0452912	0.0312491
glycoprotein	AT2G39050	OS01G0104400	45.8955	0.0452912	0.0315536
PUB17	AT1G29340	OS02G0234300	47.6764	0.0452912	0.117653
agenet	AT5G52070	OS05G0140600	26.6667	0.046142	0.0142922
HSP17.6C-CI	AT1G53540	OS03G0266300	69.5652	0.0463804	0.0219958
HSP17.6C-CI	AT1G53540	OS03G0267000	69.5652	0.0463804	0.0800834
HSP17.6C-CI	AT1G53540	OS03G0267000	69.5652	0.0463804	0.12092
protease	AT1G25510	OS01G0140100	52.5794	0.0464918	0.0201965
MMP	AT1G70170	OS02G0740700	50	0.0465262	0.220799
ethylene-responsive	AT2G31730	OS04G0493100	42.9487	0.0465331	0.0425684
galactosyltransferase	AT1G27120	OS12G0265400	46.0251	0.0465803	0.0932765
galactosyltransferase	AT1G27120	OS07G0195200	55.6561	0.0465803	0.069003
chloroplast inner membrane import Tic22	AT4G33350	OS06G0213200	58.6207	0.0468423	0.182234
SGP2	AT3G21700	OS07G0522900	64.2857	0.04718	0.0737644
zinc finger	AT2G28810	OS12G0569900	29.3103	0.0475859	0.225222
FMO GS-OX2	AT1G62540	OS10G0553800	48.9627	0.047689	0.21245
FMO GS-OX2	AT1G62540	OS10G0553800	48.9627	0.047689	0.537516
SCABP5	AT4G17615	OS10G0564800	77.4648	0.0477868	0.023885
RAD23-3	AT3G02540	OS09G0407200	55.8673	0.0479477	0.175884
RAD23-3	AT3G02540	OS08G0430200	56.1576	0.0479477	0.00907143
kinase	AT5G61450	OS07G0466200	53.4694	0.0483766	0.168347
-	AT1G70400	OS07G0141600	28.0992	0.0485585	0.0981721
DNAJ	AT3G13310	OS06G0716100	32.3308	0.0494523	0.117927
PR-1-LIKE	AT2G19990	OS02G0787000	30.3371	0.05056	0.202379
PR-1-LIKE	AT2G19990	OS04G0289600	31.5789	0.05056	0.396272
CHX14	AT1G06970	OS11G0109400	30.2122	0.0507255	0.101211
TTL1	AT1G53300	OS05G0210600	48.8778	0.0516472	0.0632234
ARG1	AT1G68370	OS01G0512100	75.6824	0.0517756	0.210562
-	AT4G01960	OS05G0131900	25.2	0.052016	0.822698
-	AT4G01960	OS01G0299500	27.1186	0.052016	0.189155
pectinase	AT3G59850	OS11G0249600	59.596	0.0522659	0.110765
MES3	AT2G23610	OS01G0557100	43.3962	0.0524768	0.216106
ELF4	AT2G40080	OS08G0366200	27.7778	0.0525193	0.0683359
ELF4	AT2G40080	OS03G0410300	30.7018	0.0525193	0.235278
ERD1	AT5G51070	OS02G0526400	63.382	0.0530255	0.147742
invertase	AT4G09510	OS11G0175400	75	0.0532988	0.445188
5'-AMP-activated kinase beta-2 subunit	AT5G21170	OS07G0687300	37.6582	0.0534618	0.0285782
5'-AMP-activated kinase beta-2 subunit	AT5G21170	OS05G0491200	47.2414	0.0534618	0.0222019
5'-AMP-activated kinase beta-2 subunit	AT5G21170	OS03G0319100	49.8305	0.0534618	0.0717127
phosphatase	AT4G18140	OS01G0665300	33.0296	0.0546648	0.00917259
phosphatase	AT4G18140	OS01G0665300	33.0296	0.0546648	0.159459
phosphatase	AT4G18140	OS01G0629400	59.887	0.0546648	0.0417734
IQD30	AT1G18840	OS01G0716200	29.9652	0.0547718	0.0194613
IQD30	AT1G18840	OS05G0535900	31.5331	0.0547718	0.0605869
DNA binding	AT3G60320	OS02G0654600	38.0234	0.0552475	0.0710177
hydrolase	AT1G80280	OS01G0647700	55.5385	0.0553333	0.166058
-	AT5G20580	OS02G0778300	59.2697	0.0566306	0.0456478
-	AT5G20580	OS02G0778300	59.2697	0.0566306	0.0729801
-	AT2G27285	OS04G0440000	41.6413	0.0568301	0.0555576
catalytic	AT1G74790	OS07G0193000	51.2931	0.0583586	0.142778
catalytic	AT1G74790	OS12G0639600	56.0519	0.0583586	0.0680505
catalytic	AT1G74790	OS03G0691800	56.7335	0.0583586	0.106955
-	AT1G74440	OS10G0407200	30.3483	0.0586615	0.415553
-	AT1G74440	OS10G0407200	30.3483	0.0586615	0.452667
-	AT1G74440	OS08G0433600	44.5	0.0586615	0.102588
-	AT1G74440	OS02G0578800	58.2888	0.0586615	0.0382936
NIF	AT5G46410	OS01G0665300	33.4852	0.0587645	0.00917259
NIF	AT5G46410	OS01G0665300	33.4852	0.0587645	0.159459
NIF	AT5G46410	OS01G0629400	60.452	0.0587645	0.0417734
peptidoglycan-binding LysM	AT1G77630	OS06G0208800	44.7853	0.0587647	0.0294395
peptidoglycan-binding LysM	AT1G77630	OS02G0769200	45.2756	0.0587647	0.0937176
translation release factor	AT1G62850	OS03G0249200	62.1145	0.0592861	0.120169
ARK3	AT4G21380	OS07G0550500	47.8375	0.0598506	0.0180601
ARK3	AT4G21380	OS07G0550500	47.8375	0.0598506	0.0283212
ARK3	AT4G21380	OS05G0501400	48.2676	0.0598506	0.117428
RLK	AT2G37710	OS07G0130200	33.2849	0.0599761	0.664146
RLK	AT2G37710	OS04G0531500	51.3587	0.0599761	0.0501949
RLK	AT2G37710	OS03G0258000	54.1667	0.0599761	0.0124043
RLK	AT2G37710	OS03G0258000	54.1667	0.0599761	0.0832012
RLK	AT2G37710	OS07G0283125	55.3064	0.0599761	0.760492
RLK	AT2G37710	OS04G0531400	55.8176	0.0599761	0.0147355
RLK	AT2G37710	OS03G0772600	55.9574	0.0599761	0.243317
ETR2	AT3G23150	OS07G0259100	37.9665	0.0611523	0.0481298
sorbitol dehydrogenase	AT5G51970	OS08G0545200	77.5068	0.061384	0.132166
-	AT4G17140	OS10G0565300	56.8627	0.0614007	0.0936233
PHB2	AT1G03860	OS07G0262200	75.7785	0.0618434	0.0239401
HHP3	AT2G24150	OS06G0652200	49.3392	0.0619005	0.369672
nodulin MtN21	AT1G44800	OS10G0210500	49.7253	0.0621115	0.594928
HSP17.6II	AT5G12020	OS02G0217900	46.2857	0.0622121	0.176379
plastocyanin-like	AT3G01070	OS07G0112700	26.4045	0.0626676	0.128018
plastocyanin-like	AT3G01070	OS03G0758500	32.1212	0.0626676	0.153643
-	AT5G44860	OS01G0800300	51.6717	0.0631997	0.307441
protein binding	AT4G25550	OS04G0683100	84.6535	0.0637873	0.548557
cobalt ion transmembrane transporter	AT3G21580	OS05G0400600	54.1237	0.0650501	0.0616979
zinc finger	AT1G19310	OS01G0766200	38.3607	0.0656227	0.0150135
zinc finger	AT1G19310	OS01G0766200	38.3607	0.0656227	0.0246607
DNAJ	AT2G20560	OS02G0306900	71.3467	0.0658231	0.0658231
APP1	AT4G36760	OS06G0664100	62.1622	0.0681532	0.129896
ICU4	AT1G52150	OS01G0200300	58.4687	0.0681551	0.0761712
PRH19	AT4G04610	OS07G0509800	61.0063	0.068695	0.101192
PRH19	AT4G04610	OS07G0509800	61.0063	0.068695	0.175925
FMO GS-OX3	AT1G62560	OS10G0553800	48.1328	0.0690438	0.21245
FMO GS-OX3	AT1G62560	OS10G0553800	48.1328	0.0690438	0.537516
sec61beta	AT3G60540	OS12G0173366	60.241	0.0695143	0.171389
sec61beta	AT3G60540	OS01G0565900	66.25	0.0695143	0.115774
PR5K	AT5G38280	OS01G0690800	31.155	0.0700285	0.583965
PR5K	AT5G38280	OS01G0690800	31.155	0.0700285	0.899298
PR5K	AT5G38280	OS04G0177000	46.0274	0.0700285	0.164861
PR5K	AT5G38280	OS05G0550700	47.7901	0.0700285	0.019686
ROF1	AT3G25230	OS01G0563000	31.5951	0.0702175	0.0582348
-	AT5G01015	OS12G0121000	27.3438	0.0709992	0.0926092
-	AT5G01015	OS12G0121000	27.3438	0.0709992	0.11493
-	AT5G01015	OS11G0121300	28.6885	0.0709992	0.11493
CXIP2	AT2G38270	OS12G0175500	54.386	0.0710455	0.971273
PTS	AT5G48840	OS03G0851800	62.6198	0.0718335	0.149979
CPK33	AT1G50700	OS07G0515100	70.9193	0.07589	0.0146562
UPP synthetase	AT2G17570	OS06G0167400	43.8127	0.0763732	0.147502
UPP synthetase	AT2G17570	OS07G0607700	43.8127	0.0763732	0.147502
WRKY6	AT1G62300	OS01G0246700	31.9613	0.0773534	0.0330958
WRKY6	AT1G62300	OS01G0246700	31.9613	0.0773534	0.04135
ENDO 2	AT1G68290	OS01G0128100	60.8247	0.0782049	0.143313
hydrolase	AT4G34215	OS04G0276600	57.384	0.0788848	0.943859
BGLU11	AT1G02850	OS05G0366600	51.0319	0.0793813	0.036738
BGLU11	AT1G02850	OS01G0930800	52.4366	0.0793813	0.0401846
BGLU11	AT1G02850	OS01G0813800	56.0345	0.0793813	0.15926
PB1	AT4G05150	OS07G0556300	25.0591	0.0793813	0.0463079
senescence-associated	AT5G47060	OS06G0125200	23.6111	0.079413	0.399476
senescence-associated	AT5G47060	OS04G0585700	31.3333	0.079413	0.0686917
senescence-associated	AT5G47060	OS02G0687200	34.9057	0.079413	0.157254
senescence-associated	AT5G47060	OS04G0586000	40.9449	0.079413	0.00200559
transferase	AT1G27620	OS01G0104900	46.1538	0.0808408	0.183586
PPa4	AT3G53620	OS01G0974800	81.106	0.0815977	0.0952209
PPa4	AT3G53620	OS05G0114000	82.4074	0.0815977	0.0160261
NMAPKK	AT4G26070	OS06G0147800	61.9318	0.0819991	0.128296
-	AT5G59410	OS05G0110600	64.5669	0.0820923	0.279863
-	AT1G60670	OS04G0523100	21.1604	0.0821089	0.02622
-	AT1G60670	OS08G0100800	24.6269	0.0821089	0.0234217
-	AT1G60670	OS02G0631200	30.3448	0.0821089	0.283216
ROPGEF14	AT1G31650	OS02G0702600	51.5654	0.0821846	0.26545
kinase	AT5G01890	OS05G0478300	49.8094	0.0831202	0.260462
kinase	AT5G01890	OS01G0821900	50.7097	0.0831202	0.0361342
ETT	AT2G33860	OS05G0515400	37.4598	0.0843736	0.0658933
ETT	AT2G33860	OS01G0753500	37.7565	0.0843736	0.124648
ETT	AT2G33860	OS01G0753500	37.7565	0.0843736	0.139202
SMO1-1	AT4G12110	OS03G0108500	54.6667	0.0854654	0.524762
SMO1-1	AT4G12110	OS10G0545200	64.4518	0.0854654	0.102879
-	AT1G47900	OS10G0162400	36.615	0.0859704	0.0424468
NFXL1	AT1G10170	OS06G0252300	60.5667	0.0860203	0.105875
NFXL1	AT1G10170	OS06G0252300	60.5667	0.0860203	0.507951
PPR	AT5G66500	OS03G0624800	37.4165	0.0861469	0.160636
pectinase	AT1G19170	OS09G0439400	60.2662	0.0863763	0.12366
kinase	AT3G59350	OS03G0844100	75	0.0867987	0.163187
RBOHF	AT1G64060	OS05G0528000	69.2955	0.0867987	0.0233099
hydrophobic	AT4G30660	OS09G0558100	54.1667	0.0869496	0.0605287
emb1473	AT1G78630	OS01G0749200	63.0901	0.0875639	0.0977346
-	AT1G06510	OS01G0696000	31.5789	0.0876126	0.0300035
ACC2	AT1G36180	OS10G0363300	16.3934	0.0900064	0.167907
GLR2.7	AT2G29120	OS06G0190800	40.122	0.0903099	0.0937176
kinase	AT1G51850	OS01G0810800	23.6926	0.0903604	0.494387
kinase	AT1G51850	OS12G0567500	34.3942	0.0903604	0.942704
-	AT3G02950	OS05G0569800	60.9053	0.0904654	0.0353779
-	AT1G67330	OS11G0490100	45.6954	0.0913282	0.990196
SRK2E	AT4G33950	OS03G0610900	83.9779	0.0919083	0.958976
-	AT4G24530	OS09G0412200	69.1406	0.0921961	0.499435
stress-inducible	AT4G12400	OS04G0538000	62.7677	0.0922446	0.0610869
stress-inducible	AT4G12400	OS02G0644100	67.6471	0.0922446	0.179625
SCL13	AT4G17230	OS07G0583600	45.9559	0.092518	0.0273652
SOS1	AT2G01980	OS12G0641100	67.9012	0.0926874	0.0525649
AHK3	AT1G27320	OS01G0923700	62.4818	0.0927033	0.907478
-	AT4G32350	OS06G0687000	22.4966	0.0935153	0.0557052
-	AT5G44250	OS11G0614900	48.9451	0.0945146	0.0974759
Hsp70b	AT1G16030	OS03G0277300	82.6953	0.0949428	0.612016
Hsp70b	AT1G16030	OS03G0277300	82.6953	0.0949428	0.889499
-	AT2G36885	OS03G0137600	58.9641	0.0955859	0.0709568
DNA-binding S1FA	AT3G53370	OS04G0408700	63.75	0.0958222	0.330644
-	AT1G55160	OS01G0579800	36.8056	0.0962721	0.0164619
histone H2B	AT3G53650	OS01G0152700	97.561	0.0964298	0.416855
hydrolase	AT3G11040	OS05G0346500	43.7946	0.096497	0.0560355
ATJ2	AT5G22060	OS03G0648400	80.5755	0.0980837	0.00980318
ATJ2	AT5G22060	OS03G0648400	80.5755	0.0980837	0.0250893
kinase	AT5G67200	OS04G0649700	41.2676	0.0981451	0.075995
UGT78D2	AT5G17050	OS07G0148200	38.3648	0.0986032	0.0820026
DTC	AT5G19760	OS11G0432400	78.9644	0.0987704	0.0354688
DTC	AT5G19760	OS11G0432400	78.9644	0.0987704	0.243345
DTC	AT5G19760	OS05G0208000	81.6993	0.0987704	0.0146403
DTC	AT5G19760	OS05G0208000	81.6993	0.0987704	0.156706
ethylene-responsive	AT4G29100	OS05G0228400	34.2169	0.0992271	0.029129
RRA2	AT1G75110	OS07G0587100	67.1361	0.100419	0.0771518
CYP81F3	AT4G37400	OS12G0582666	32.4561	0.100499	0.426725
CYP81F3	AT4G37400	OS03G0760200	40.7407	0.100499	0.0407963
SCS-alpha	AT5G08300	OS07G0577700	82.7795	0.100499	0.059395
ANAC13	AT1G32870	OS09G0493700	19.5157	0.100816	0.0236993
DNA repair ATPase	AT2G24420	OS09G0497700	45.9641	0.100816	0.0763225
ATPase, coupled to transmembrane movement of ions, phosphorylative mechanism	AT1G17500	OS06G0565900	75	0.101539	0.168626
-	AT2G17850	OS02G0157600	34.5865	0.102887	0.101505
-	AT2G17850	OS02G0157600	34.5865	0.102887	0.121033
VPS2.2	AT5G44560	OS03G0639800	75.9825	0.103339	0.390871
WI12	AT3G10985	OS03G0299600	21.0526	0.104497	0.0897906
WI12	AT3G10985	OS07G0691300	38.3838	0.104497	0.0126112
UGE1	AT1G12780	OS09G0526700	64.6113	0.10498	0.0837644
CCCH-type	AT5G07060	OS07G0281000	45.2675	0.105157	0.0358277
CCCH-type	AT5G07060	OS06G0170500	47.0954	0.105157	0.0660921
glycine-rich	AT3G29075	OS06G0232000	19.1601	0.107361	0.346537
DNAJ	AT1G80030	OS02G0804500	63.2444	0.107807	0.138146
heavy-metal-associated	AT5G23760	OS10G0506100	60	0.109254	0.613452
heavy-metal-associated	AT5G23760	OS03G0111400	75.2381	0.109254	0.0818848
-	AT4G24460	OS03G0199000	42.3948	0.110566	0.43054
-	AT4G24460	OS12G0511300	62.0991	0.110566	0.00562742
ALF4	AT5G11030	OS08G0290100	35.4201	0.11086	0.0100671
catalytic/ glucosylceramidase	AT1G33700	OS11G0242100	58.1053	0.111084	0.175155
-	AT4G28760	OS02G0617100	23.1746	0.111466	0.0370844
-	AT4G28760	OS02G0617100	23.1746	0.111466	0.0385859
-	AT4G28760	OS02G0816400	27.9443	0.111466	0.0381678
-	AT4G28760	OS03G0143700	29.9667	0.111466	0.0704302
RAP2.10	AT4G36900	OS06G0166400	44.5652	0.111633	0.0231435
RAP2.10	AT4G36900	OS06G0166400	44.5652	0.111633	0.0356956
senescence-associated	AT4G17670	OS06G0125200	22.9167	0.11183	0.399476
senescence-associated	AT4G17670	OS04G0585700	30.6667	0.11183	0.0686917
senescence-associated	AT4G17670	OS02G0687200	35.8491	0.11183	0.157254
senescence-associated	AT4G17670	OS04G0586000	39.3701	0.11183	0.00200559
STA1	AT4G03430	OS10G0498600	75.9346	0.11183	0.115611
SYP132	AT5G08080	OS07G0164300	66.9967	0.11344	0.106428
AAE1	AT1G20560	OS03G0101000	49.3151	0.114731	0.00939958
AAE1	AT1G20560	OS01G0342900	55.6114	0.114731	0.607951
AAE1	AT1G20560	OS03G0133500	56.3636	0.114731	0.0690868
AAE1	AT1G20560	OS02G0119200	58.4939	0.114731	0.117791
MAP1A	AT2G45240	OS10G0508400	78.7179	0.114731	0.135549
MYB60	AT1G08810	OS11G0128500	46.4286	0.115471	0.0425639
MYB60	AT1G08810	OS12G0125000	46.9453	0.115471	0.0425639
PPR	AT5G61990	OS07G0300200	28.3317	0.115725	0.0212678
-	AT1G61280	OS03G0640300	32.967	0.115734	0.107171
EMB3003	AT1G34430	OS12G0182200	68.7366	0.116305	0.927913
DHAR3	AT5G16710	OS06G0232600	62.1324	0.116596	0.0133518
ACR7	AT4G22780	OS03G0247900	48.19	0.117488	0.095425
kinase	AT5G56790	OS05G0589700	48.9754	0.117801	0.0265236
Ndr	AT5G56750	OS05G0196200	69.4051	0.117801	0.222135
Ndr	AT5G56750	OS06G0563000	69.8276	0.117801	0.0272305
Ndr	AT5G56750	OS01G0192600	73.487	0.117801	0.0982671
hydrophobic	AT4G30650	OS09G0558100	48.6111	0.118865	0.0605287
TF	AT1G67310	OS01G0923600	37.1298	0.119182	0.0324572
TF	AT1G67310	OS01G0923600	37.1298	0.119182	0.0516347
HSP70T-2	AT2G32120	OS03G0218500	65.5709	0.119191	0.238017
ENTH	AT5G35200	OS02G0803300	57.8207	0.119205	0.0770367
PPa5	AT4G01480	OS10G0406100	83.8235	0.119688	0.347729
Mn	AT3G56350	OS05G0323900	62.3377	0.120492	0.841547
protein transport SEC61 gamma subunit	AT4G24920	OS06G0653900	91.3043	0.120598	0.319653
myosin heavy chain	AT4G31340	OS09G0497700	46.861	0.121182	0.0763225
-	AT3G02420	OS01G0641700	51.3011	0.121506	0.116072
-	AT3G02420	OS01G0604700	61.8644	0.121506	0.203564
-	AT3G02420	OS01G0604700	61.8644	0.121506	0.289411
MYB4	AT4G38620	OS09G0538400	60.1594	0.121566	0.0974351
atnudt11	AT5G45940	OS05G0209400	41.0853	0.122203	0.012345
mTERF	AT1G56380	OS11G0206600	9.18367	0.122885	0.195354
mTERF	AT1G56380	OS11G0246100	14.8681	0.122885	0.0981843
mTERF	AT1G56380	OS06G0224400	15.3061	0.122885	0.113127
mTERF	AT1G56380	OS05G0413000	18.481	0.122885	0.284747
HSL1	AT1G28440	OS01G0239700	59.7804	0.123207	0.202162
-	AT3G13780	OS06G0565300	37.0861	0.123331	0.490323
NCBP	AT5G18110	OS03G0262400	69.163	0.124136	0.196676
zinc finger	AT4G31420	OS06G0693600	24.4604	0.126257	0.0434538
acid phosphatase class B	AT4G29260	OS06G0559500	44.3182	0.126729	0.0448227
eRF1	AT3G58390	OS04G0659900	42.4603	0.126767	0.153322
kinase	AT3G28690	OS09G0361100	73.6979	0.127415	0.0883226
cell cycle control	AT1G17130	OS01G0588700	56.0606	0.127619	0.0732986
plastocyanin-like	AT1G22480	OS09G0469300	36.1842	0.128063	0.191313
CCCH-type	AT2G24830	OS02G0793000	54.7619	0.12816	0.176833
CCCH-type	AT2G24830	OS02G0793000	54.7619	0.12816	0.55764
CCCH-type	AT2G24830	OS02G0793000	54.7619	0.12816	0.594808
RNA-binding	AT3G46020	OS01G0502800	60.3774	0.129258	0.0766957
RNA-binding	AT3G46020	OS01G0502800	60.3774	0.129258	0.0879951
VPS20.1	AT5G63880	OS02G0596500	62.2318	0.129797	0.20307
ZFN3	AT5G16540	OS01G0917400	47.3804	0.130354	0.022107
U-box	AT1G76390	OS12G0277000	40.5694	0.131048	0.0806028
U-box	AT1G76390	OS03G0657100	47.5728	0.131048	0.37454
VHA-A2	AT2G21410	OS10G0184300	78.0952	0.131074	0.142853
POLH	AT5G44740	OS01G0757800	54.9844	0.131337	0.0457806
CSLB06	AT4G15320	OS04G0429500	28.0561	0.131746	0.0457301
pectinesterase	AT5G64640	OS04G0438400	48.2759	0.131759	0.00716948
NDB1	AT4G28220	OS06G0684000	61.3946	0.132621	0.0464387
CAD6	AT4G37970	OS03G0223200	50.5236	0.13429	0.106708
CAD6	AT4G37970	OS04G0612700	55.1451	0.13429	0.835329
WRKY2	AT5G56270	OS09G0481700	33.1754	0.13445	0.219942
GAUT6	AT1G06780	OS11G0592300	51.4851	0.134639	0.114501
-	AT1G72270	OS04G0625300	29.5322	0.135172	0.0143414
TIP	AT5G24590	OS08G0157900	18.93	0.135342	0.49588
TIP	AT5G24590	OS08G0157900	18.93	0.135342	0.980777
GSTU16	AT1G59700	OS10G0525400	41.8033	0.135424	0.48543
GSTU16	AT1G59700	OS10G0481300	44.6078	0.135424	0.12724
anac084	AT5G14000	OS01G0925400	24.5614	0.136064	0.022641
anac084	AT5G14000	OS01G0925400	24.5614	0.136064	0.0292898
BRL1	AT1G55610	OS08G0342300	52.0593	0.138092	0.212342
-	AT3G53540	OS03G0819700	16.041	0.138504	0.102243
-	AT3G53540	OS03G0287700	25.9542	0.138504	0.100858
NFD2	AT1G20693	OS09G0551600	54.3307	0.139347	0.180575
NFD2	AT1G20693	OS09G0551600	54.3307	0.139347	0.194161
CW7	AT1G59520	OS04G0183100	54.0741	0.139851	0.414632
CW7	AT1G59520	OS04G0183100	54.0741	0.139851	0.495398
HAG3	AT5G50320	OS04G0484900	87.9581	0.140057	0.409231
XI-1	AT1G17580	OS05G0537300	48.7465	0.141881	0.0374562
XI-1	AT1G17580	OS05G0537300	48.7465	0.141881	0.0486542
XI-1	AT1G17580	OS03G0686300	70.5882	0.141881	0.324996
chaperonin	AT3G11830	OS06G0687700	92.053	0.143036	0.145251
-	AT5G25590	OS05G0394200	47.0588	0.143369	0.117653
zinc finger	AT5G60710	OS10G0464500	29.0123	0.144421	0.0701409
zinc finger	AT5G60710	OS03G0142500	46.9741	0.144421	0.0843786
zinc finger	AT5G60710	OS04G0508800	49.2938	0.144421	0.133566
zinc finger	AT5G60710	OS02G0806700	54.7718	0.144421	0.548841
kinase	AT1G64210	OS01G0223600	45.935	0.144555	0.730224
Sm D2	AT2G47640	OS05G0314100	92.381	0.144595	0.157056
NRT2.5	AT1G12940	OS01G0704100	62.1415	0.144991	0.00777939
SPA4	AT1G53090	OS01G0725800	46.9745	0.145435	0.360039
SPA4	AT1G53090	OS01G0725800	46.9745	0.145435	0.464142
SPA4	AT1G53090	OS01G0725800	46.9745	0.145435	0.590768
-	AT4G28330	OS12G0295600	37.3134	0.14716	0.0485025
-	AT1G17490	OS09G0363700	26.1538	0.148913	0.0744902
In2-1	AT5G02780	OS03G0283100	50.8197	0.150162	0.172832
In2-1	AT5G02780	OS03G0283200	53.0864	0.150162	0.0505085
FTSH11	AT5G53170	OS01G0618800	81.1688	0.152906	0.0833178
myb	AT5G58900	OS05G0449900	42.5397	0.152999	0.0985242
myb	AT5G58900	OS01G0853700	45.485	0.152999	0.0157306
-	AT4G17010	OS02G0494600	25.8182	0.152999	0.0565011
-	AT5G58020	OS06G0183900	52	0.152999	0.0509214
-	AT2G01070	OS11G0546100	62.0623	0.155598	0.12363
UCU1	AT4G18710	OS02G0236200	80.0499	0.156812	0.00848886
UCU1	AT4G18710	OS01G0205700	86.6953	0.156812	0.0225259
UCU1	AT4G18710	OS01G0205700	86.6953	0.156812	0.0981721
AGG1	AT3G63420	OS03G0635100	44.086	0.157076	0.0767013
DNAJ	AT4G28480	OS02G0306900	70.2006	0.157875	0.0658231
GTP binding	AT2G18720	OS12G0607100	76.5086	0.159326	0.163606
binding	AT4G30990	OS01G0584800	32.8571	0.160795	0.251336
NGA1	AT2G46870	OS06G0107800	45	0.160795	0.0366302
GST18	AT2G02390	OS11G0245100	52.5	0.161647	0.157254
GST18	AT2G02390	OS12G0210300	53.7736	0.161647	0.00456826
GST18	AT2G02390	OS02G0564000	55.6962	0.161647	0.0363827
GST18	AT2G02390	OS12G0210200	57.9439	0.161647	0.0848704
NDUFA8	AT3G06310	OS03G0295500	67.2727	0.162403	0.218041
RhoGAP	AT5G61530	OS07G0486500	60.7046	0.163112	0.023885
-	AT3G27770	OS02G0130600	32.5967	0.164561	0.0552132
hydrolase	AT2G38740	OS09G0407700	54.7619	0.165743	0.0102713
hydrolase	AT2G38740	OS09G0407700	54.7619	0.165743	0.0831192
eIF-2B	AT5G01940	OS03G0333300	35.9259	0.166043	0.139013
eIF-2B	AT5G01940	OS03G0333300	35.9259	0.166043	0.219854
kinase	AT3G61960	OS03G0122000	35.4294	0.166243	0.0200313
ARF6	AT1G30330	OS06G0677800	64.1221	0.166378	0.172362
ARF6	AT1G30330	OS02G0164900	64.3172	0.166378	0.156215
SCX	AT3G51840	OS01G0159400	75.7506	0.166378	0.039476
SCX	AT3G51840	OS01G0159400	75.7506	0.166378	0.122738
HS1	AT3G17210	OS01G0516600	60.177	0.166704	0.00522507
HS1	AT3G17210	OS01G0516600	60.177	0.166704	0.486049
kinase	AT2G05940	OS08G0457400	48.3264	0.16827	0.0414976
kinase	AT2G05940	OS03G0407900	49.6	0.16827	0.136606
kinase	AT2G05940	OS06G0202900	56.338	0.16827	0.404001
kinase	AT2G05940	OS03G0179400	60.7059	0.16827	0.713557
kinase	AT2G05940	OS10G0395000	61.1825	0.16827	0.0856939
kinase	AT2G05940	OS10G0395000	61.1825	0.16827	0.126393
EMB2769	AT3G13200	OS06G0106100	75.6522	0.168657	0.261938
-	AT2G41950	OS03G0226700	36.6412	0.169185	0.059395
-	AT5G18130	OS07G0204100	23.5808	0.169419	0.657185
-	AT5G18130	OS03G0806600	24.4541	0.169419	0.654238
-	AT5G22875	OS04G0165500	70	0.169539	0.0164725
GNAT	AT2G39030	OS03G0151600	43.6123	0.169733	0.260782
-	AT3G15420	OS04G0530000	27.7778	0.17128	0.0121657
NRAMP6	AT1G15960	OS06G0676000	69.6364	0.17177	0.0861203
zinc finger	AT5G38895	OS01G0926200	42.3581	0.172384	0.191266
BPC6	AT5G42520	OS06G0130600	49.8489	0.172544	0.0208468
peptidoglycan-binding LysM	AT1G55000	OS03G0699600	47.7477	0.17364	0.234593
purple acid phosphatase	AT1G25230	OS11G0549615	52.381	0.174822	0.656541
amidase	AT4G34880	OS04G0184100	50.1984	0.174901	0.350009
amidase	AT4G34880	OS04G0183300	52.8481	0.174901	0.707818
kinase	AT2G25760	OS01G0744300	81.5745	0.174938	0.0453934
La1	AT4G32720	OS02G0610400	40.0428	0.174938	0.0767203
La1	AT4G32720	OS04G0497600	44.5977	0.174938	0.0555224
ALS3	AT2G37330	OS05G0119000	67.3684	0.175148	0.0462635
TCP TF	AT2G45680	OS08G0544800	32.7078	0.175963	0.0456119
-	AT5G01010	OS05G0306000	56.0364	0.181241	0.400155
IAA22	AT1G19220	OS06G0196700	77.6699	0.181261	0.0128853
UGE2	AT4G23920	OS09G0323000	66.6667	0.181287	0.145204
ATP binding	AT3G27120	OS12G0443800	17.5393	0.181392	0.0543262
ZIGA4	AT1G08680	OS03G0323500	34.4444	0.1829	0.005295
FAD-binding	AT4G20840	OS02G0235900	38.8007	0.183845	0.0207655
FAD-binding	AT4G20840	OS06G0549300	42.065	0.183845	0.163094
FAD-binding	AT4G20840	OS06G0549300	42.065	0.183845	0.175322
FAD-binding	AT4G20840	OS06G0548200	42.6966	0.183845	0.495216
HTA12	AT5G02560	OS05G0461400	77.9141	0.186976	0.101463
kinase	AT2G28960	OS01G0810800	21.9851	0.187954	0.494387
kinase	AT2G28960	OS12G0567500	33.7782	0.187954	0.942704
anac075	AT4G29230	OS01G0191300	54.3158	0.189143	0.190126
kinase	AT1G51790	OS01G0810800	23.6926	0.189564	0.494387
kinase	AT1G51790	OS12G0567500	32.4435	0.189564	0.942704
MST2	AT1G16460	OS02G0167100	59.9349	0.189949	0.721985
AOC3	AT3G25780	OS03G0438100	53.3333	0.19003	0.0356077
integral membrane Yip1	AT3G52760	OS03G0289200	53.125	0.19031	0.531982
LSU2	AT5G24660	OS02G0129800	37.2549	0.190321	0.037589
YSL6	AT3G27020	OS04G0390600	7.1599	0.19148	0.798833
YSL6	AT3G27020	OS04G0390500	74.0413	0.19148	0.157708
ZIP4	AT1G10970	OS05G0198400	53.3854	0.192374	0.326249
ZIP4	AT1G10970	OS06G0566300	61.1825	0.192374	0.907342
VPS55	AT1G32410	OS02G0803400	61.0294	0.192542	0.0371787
zinc finger	AT3G03550	OS04G0590900	34.9869	0.19406	0.0463958
zinc finger	AT3G03550	OS02G0692000	35.4756	0.19406	0.0247152
-	AT5G48590	OS11G0456100	35.7513	0.194822	0.0252045
-	AT5G48590	OS11G0456100	35.7513	0.194822	0.640549
-	AT2G06005	OS02G0778300	60.9551	0.195103	0.0456478
-	AT2G06005	OS02G0778300	60.9551	0.195103	0.0729801
-	AT4G25870	OS02G0175500	53.0769	0.196403	0.501758
nuclease	AT5G11350	OS01G0610600	27.021	0.197042	0.230642
-	AT1G24050	OS02G0741900	49.7238	0.197323	0.123757
kinase	AT3G10030	OS04G0405800	54.7855	0.198453	0.382667
kinase	AT3G10030	OS04G0405800	54.7855	0.198453	0.484738
PMDH2	AT5G09660	OS12G0632700	70.7865	0.198453	0.119031
PMDH2	AT5G09660	OS03G0773800	71.4689	0.198453	0.952306
kinase	AT3G56370	OS05G0478300	56.0356	0.199359	0.260462
kinase	AT3G56370	OS01G0821900	58.0645	0.199359	0.0361342
O-acetyltransferase	AT5G46340	OS05G0582100	72.037	0.200118	0.0582719
O-acetyltransferase	AT5G46340	OS01G0631100	73.6549	0.200118	0.0992249
O-acetyltransferase	AT5G46340	OS01G0631100	73.6549	0.200118	0.123799
O-acetyltransferase	AT5G46340	OS01G0631100	73.6549	0.200118	0.138149
UBC6	AT2G46030	OS10G0447100	79.8611	0.200166	0.410598
KH	AT2G22600	OS07G0439100	17.1674	0.200575	0.171261
abscisic acid-responsive HVA22	AT5G42560	OS03G0250200	36.9369	0.201965	0.0832716
abscisic acid-responsive HVA22	AT5G42560	OS10G0177400	37.069	0.201965	0.0799618
DCL2	AT3G03300	OS03G0583900	43.4043	0.202396	0.239417
DCL2	AT3G03300	OS03G0583900	43.4043	0.202396	0.254296
APG4b	AT3G59950	OS03G0391000	48.1013	0.203895	0.181053
APG4b	AT3G59950	OS04G0682000	49.3724	0.203895	0.0153391
RPS4B	AT5G07090	OS05G0368300	86.692	0.204822	0.567176
-	AT3G07580	OS02G0609400	32.2785	0.204822	0.243534
RING1	AT5G10380	OS04G0450400	15.8351	0.205693	0.0918427
calmodulin binding	AT5G04020	OS05G0381700	13.2832	0.2077	0.0932989
signal recognition particle receptor alpha subunit	AT4G30600	OS08G0480100	70.9936	0.207706	0.0388041
PAP8	AT2G01890	OS11G0549615	51.0204	0.207953	0.656541
MEE15	AT2G16970	OS02G0667500	34.5566	0.208363	0.148258
CBL8	AT1G64480	OS01G0598200	58.2569	0.208368	0.776995
CBL8	AT1G64480	OS05G0534400	63.8095	0.208368	0.124203
-	AT1G13930	OS10G0330000	33.3333	0.209028	0.133994
clathrin coat assembly	AT1G47830	OS12G0207300	95.7747	0.209344	0.158209
-	AT1G16170	OS08G0266200	54.6392	0.210005	0.210543
ACC oxidase	AT1G12010	OS09G0451400	62.7329	0.21082	0.110765
ACC oxidase	AT1G12010	OS09G0451000	63.0435	0.21082	0.0197556
PHV	AT1G30490	OS12G0612700	70.2924	0.211168	0.0481336
PHV	AT1G30490	OS03G0640800	71.7113	0.211168	0.0240504
ankyrin repeat	AT2G31820	OS09G0518500	59.9644	0.211294	0.260125
ankyrin repeat	AT2G31820	OS08G0542700	61.0413	0.211294	0.355861
XH	AT3G29375	OS05G0153200	12.8086	0.21131	0.0833683
XH	AT3G29375	OS02G0293300	15.7407	0.21131	0.0870223
TFIIB	AT2G41630	OS09G0534800	77.8846	0.212528	0.0163859
-	AT1G05210	OS03G0646400	37.9518	0.212532	0.0251711
-	AT1G05210	OS03G0646400	37.9518	0.212532	0.0474396
-	AT1G05210	OS03G0646400	37.9518	0.212532	0.0683183
-	AT1G05210	OS07G0458500	44.2424	0.212532	0.0544208
SINA	AT3G13672	OS03G0356414	37.2093	0.213752	0.0964882
SINA	AT3G13672	OS07G0659800	38.0795	0.213752	0.0170555
2-oxoisovalerate dehydrogenase	AT5G09300	OS12G0183100	59.8765	0.215041	0.203147
LTP	AT1G48750	OS11G0620300	30	0.216042	0.725726
LTP	AT1G48750	OS03G0111300	34.375	0.216042	0.190236
LTP	AT1G48750	OS05G0550300	44.6809	0.216042	0.534463
-	AT3G52060	OS07G0158800	49.5822	0.216446	0.825053
-	AT3G52060	OS03G0648100	53.3149	0.216446	0.172973
-	AT5G19570	OS05G0188300	57.2519	0.216588	0.156756
C2	AT1G04150	OS02G0816000	59.3594	0.216746	0.0713454
-	AT1G79510	OS04G0613300	41.2811	0.21961	0.168769
auxin-responsive	AT3G12955	OS12G0609600	25.4335	0.222645	0.111685
VPS28-1	AT4G21560	OS01G0781000	65.2582	0.222753	0.0610332
GRH1	AT4G03190	OS05G0150500	58.9438	0.223705	0.294405
RUB1-conjugating enzyme	AT2G18600	OS08G0374100	58.1897	0.223814	0.103975
RUB1-conjugating enzyme	AT2G18600	OS10G0190000	77.7174	0.223814	0.0423025
RUB1-conjugating enzyme	AT2G18600	OS10G0190000	77.7174	0.223814	0.141435
tRNA syn	AT4G39280	OS10G0400800	65.7201	0.224819	0.226026
EMB2763	AT2G17510	OS03G0129200	64.7727	0.226278	0.0846113
EMB2763	AT2G17510	OS03G0129200	64.7727	0.226278	0.180225
EMB2763	AT2G17510	OS03G0129200	64.7727	0.226278	0.258319
EMB1738	AT1G11680	OS11G0525200	74.2857	0.228237	0.0865396
pectinase	AT3G16850	OS12G0554800	56.6038	0.229611	0.00916048
cyclin	AT3G19650	OS03G0203000	25.8953	0.230535	0.163187
PHYA	AT1G09570	OS03G0719800	62.766	0.231664	0.127346
PHYA	AT1G09570	OS03G0719800	62.766	0.231664	0.167856
thioesterase	AT1G68260	OS04G0553300	37.5839	0.233038	0.0159482
GPK1	AT3G17420	OS01G0323000	56.7829	0.233344	0.0916192
transducin	AT3G21540	OS03G0151700	59.7872	0.233426	0.272872
protease	AT5G47550	OS03G0429000	38.2114	0.233589	0.0760275
HSP26.5-P	AT1G52560	OS02G0201000	26.9406	0.233842	0.00742267
-	AT1G05370	OS03G0219100	50.6849	0.234542	0.0638314
protein binding	AT1G60610	OS02G0130300	34.6939	0.237547	0.014023
protein binding	AT1G60610	OS02G0130300	34.6939	0.237547	0.12708
POT	AT1G62200	OS10G0579800	39.4046	0.240743	0.0291857
POT	AT1G62200	OS10G0579800	39.4046	0.240743	0.047357
POT	AT1G62200	OS04G0597501	39.5112	0.240743	0.105684
POT	AT1G62200	OS10G0579600	42.7065	0.240743	0.0458065
POT	AT1G62200	OS10G0370700	46.1404	0.240743	0.0299906
POT	AT1G62200	OS10G0370700	46.1404	0.240743	0.0428183
POT	AT1G62200	OS03G0235700	54.188	0.240743	0.183488
chromosome-associated kinesin	AT5G60930	OS02G0742900	71.7105	0.243528	0.0716605
protease	AT5G60190	OS11G0102700	5.41667	0.244592	0.115927
protease	AT5G60190	OS12G0102350	5.43933	0.244592	0.115927
endomembrane 70	AT1G14670	OS10G0112600	79.6581	0.245239	0.106745
endomembrane 70	AT1G14670	OS10G0112600	79.6581	0.245239	0.249837
cinnamoyl-CoA reductase	AT2G02400	OS01G0978400	56.2691	0.247366	0.0559371
GPDHC1	AT2G41540	OS05G0495700	76.129	0.247366	0.0983712
GPDHC1	AT2G41540	OS05G0495700	76.129	0.247366	0.110009
ubiquitin-associated (UBA)/TS-N	AT2G41160	OS01G0806000	44.9438	0.247984	0.175182
hydrolase	AT5G16140	OS01G0132800	56.3707	0.248028	0.020193
hydrolase	AT5G16140	OS01G0132800	56.3707	0.248028	0.020794
UTR3	AT1G14360	OS06G0593100	68.1564	0.248551	0.21763
GGH2	AT1G78680	OS05G0517500	56.0831	0.248896	0.132584
dehydrogenase	AT5G15910	OS02G0556100	50	0.250831	0.106698
PAZ	AT5G21150	OS01G0275600	64.3805	0.252287	0.0814529
CYP76C1	AT2G45560	OS02G0571900	37.5	0.25398	0.0322448
CYP76C1	AT2G45560	OS06G0501900	38.2178	0.25398	0.100575
CYP76C1	AT2G45560	OS02G0569000	38.9222	0.25398	0.132166
CYP76C1	AT2G45560	OS03G0248200	44.4444	0.25398	0.519256
ALC	AT5G67110	OS02G0805250	22.1429	0.254216	0.0227786
ALC	AT5G67110	OS06G0164400	31.4721	0.254216	0.18232
GLP6	AT5G39100	OS08G0189200	36	0.255603	0.156308
GLP6	AT5G39100	OS12G0154700	37.9913	0.255603	0.226472
FLA7	AT2G04780	OS08G0502400	44.8905	0.256046	0.0541776
galactosyltransferase	AT3G14960	OS06G0156900	61.9565	0.2568	0.398568
PPR	AT5G48730	OS06G0172000	59.8826	0.257522	0.152048
NHX1	AT5G27150	OS05G0148600	67.4632	0.259926	0.142568
NHX1	AT5G27150	OS11G0648000	67.5229	0.259926	0.0429912
NHX1	AT5G27150	OS07G0666900	73.271	0.259926	0.532775
S1 RNA-binding	AT1G71720	OS01G0589000	48.6301	0.260269	0.41253
S1 RNA-binding	AT1G71720	OS01G0589000	48.6301	0.260269	0.777253
-	AT4G17240	OS05G0547100	44.1379	0.261407	0.0346903
TOC64-I	AT1G08980	OS04G0117900	53.4562	0.26152	0.889499
TOC64-I	AT1G08980	OS04G0118100	55.4023	0.26152	0.0829472
zinc finger	AT2G35000	OS02G0572300	18.6603	0.261849	0.091012
zinc finger	AT2G35000	OS03G0188200	24.0793	0.261849	0.0315536
zinc finger	AT2G35000	OS06G0218300	24.6606	0.261849	0.0295015
zinc finger	AT2G35000	OS02G0572200	28.3668	0.261849	0.151848
VLN3	AT3G57410	OS03G0356700	62.5259	0.262414	0.0654578
NPH3	AT2G47860	OS03G0347700	53.3532	0.264069	0.527117
D111	AT2G42330	OS12G0615800	37.3223	0.264283	0.11229
-	AT5G03050	OS03G0108700	27.8107	0.264283	0.0570384
ribosome	AT5G66360	OS07G0509600	46.1095	0.264405	0.0771518
chloroplast nucleoid DNA-binding	AT5G10770	OS02G0720600	37.797	0.264566	0.897698
-	AT2G19350	OS02G0176400	67.9612	0.264566	0.605217
-	AT3G19680	OS07G0133500	44.8052	0.264566	0.00831131
-	AT3G19680	OS03G0773000	49.5495	0.264566	0.538954
RPS25A	AT2G16360	OS11G0153800	53.7037	0.26579	0.0526305
RPS25A	AT2G16360	OS09G0568800	58.3333	0.26579	0.137465
RPS25A	AT2G16360	OS08G0559200	60.1852	0.26579	0.472966
RPS25A	AT2G16360	OS08G0559200	60.1852	0.26579	0.715372
BCAT4	AT3G19710	OS03G0231600	41.9277	0.266066	0.0946257
BETA-TIP	AT1G17810	OS04G0527900	55.0943	0.266681	0.837321
BETA-TIP	AT1G17810	OS10G0492600	61.7424	0.266681	0.0323983
transformer serine/arginine-rich ribonucleoprotein	AT1G07350	OS03G0265600	58.4	0.267475	0.288993
transformer serine/arginine-rich ribonucleoprotein	AT1G07350	OS03G0265600	58.4	0.267475	0.359867
FAH1	AT2G34770	OS12G0628400	68.4874	0.268531	0.0194848
peroxidase	AT5G40150	OS04G0465100	48.3582	0.272928	0.0695321
PB1	AT5G63130	OS11G0444700	29.9107	0.274371	0.0532026
PB1	AT5G63130	OS11G0444900	31.4815	0.274371	0.0899626
PRA7	AT1G55190	OS01G0196500	42.2886	0.275709	0.125738
-	AT3G59390	OS11G0267100	44.5783	0.276685	0.22922
elongation factor Tu	AT3G22980	OS02G0543300	51.0448	0.280049	0.636523
PP2C	AT5G59220	OS03G0268600	51.4851	0.280049	0.484401
-	AT3G06710	OS08G0100400	5.40984	0.280694	0.39978
-	AT3G06710	OS08G0100400	5.40984	0.280694	0.55483
NHX6	AT1G79610	OS09G0286400	75.3271	0.280753	0.0735981
MOM	AT1G08060	OS02G0110700	13.8229	0.281075	0.294038
WSIP1	AT1G15750	OS03G0254700	78.6408	0.281075	0.35805
QSOX2	AT2G01270	OS05G0552500	55.3606	0.281271	0.05616
AKT3	AT4G22200	OS05G0428700	51.9435	0.282915	0.190985
CPK8	AT5G19450	OS07G0568600	73.2727	0.283103	0.124889
anac074	AT4G28530	OS10G0477600	39.5062	0.284829	0.0871476
glycerophosphoryl diester phosphodiesterase	AT1G74210	OS01G0763600	65.7289	0.285479	0.043374
GID1C	AT5G27320	OS05G0407500	61.2994	0.285508	0.127927
NRPE9B	AT4G16265	OS03G0102200	77.193	0.285939	0.0486812
NRPE9B	AT4G16265	OS12G0560400	84.6154	0.285939	0.474844
beige	AT1G03060	OS03G0744650	65.374	0.286753	0.0375731
Nek7	AT3G12200	OS02G0590800	36.3167	0.289338	0.0612966
hydrolase	AT4G13050	OS09G0505300	76.087	0.290801	0.0789359
oxidoreductase	AT1G48980	OS06G0138200	28.5714	0.292135	0.022107
VOZ2	AT2G42400	OS05G0515700	30.1092	0.292217	0.041337
VOZ2	AT2G42400	OS01G0753000	37.2659	0.292217	0.086755
clathrin binding	AT4G18060	OS07G0508300	62.6437	0.293717	0.0571892
CCCH-type	AT2G20280	OS01G0834700	75.1366	0.294815	0.507273
LTP2	AT2G38530	OS05G0477900	42.1687	0.296065	0.911795
exostosin	AT5G62220	OS06G0342000	41.7266	0.297406	0.0424468
MEE63	AT1G02140	OS08G0107900	60.6742	0.297612	0.0527283
integral membrane	AT1G17200	OS04G0281900	49.7608	0.301289	0.126076
integral membrane	AT1G17200	OS04G0281900	49.7608	0.301289	0.173209
VOZ1	AT1G28520	OS05G0515700	37.5975	0.302958	0.041337
VOZ1	AT1G28520	OS01G0753000	44.9438	0.302958	0.086755
DNA-binding S1FA	AT3G09735	OS04G0408700	61.25	0.305724	0.330644
IRX4	AT1G15950	OS02G0811600	49.1468	0.307998	0.752899
IRX4	AT1G15950	OS01G0283600	54.2945	0.307998	0.454252
IRX4	AT1G15950	OS08G0277200	59.0643	0.307998	0.0333772
BGLU28	AT2G44460	OS04G0474500	41.2969	0.309206	0.0539506
CYP81D2	AT4G37360	OS12G0582666	37.0175	0.309402	0.426725
CYP81D2	AT4G37360	OS03G0760200	41.5205	0.309402	0.0407963
CHX13	AT2G30240	OS11G0109400	30.9613	0.311568	0.101211
RHA1	AT5G45130	OS03G0666500	80.7882	0.313151	0.282612
NRPC2	AT5G45140	OS03G0403100	69.2641	0.31349	0.0581238
Ran-binding	AT1G55040	OS07G0404300	42.0402	0.315876	0.0809701
LYM2	AT2G17120	OS11G0548600	31.4516	0.316623	0.0599275
LYM2	AT2G17120	OS03G0133400	33.9888	0.316623	0.0434522
LRR	AT1G15740	OS02G0613200	63.7457	0.319026	0.244022
AIG	AT4G31310	OS02G0141000	53.5948	0.320163	0.0140205
TOPP5	AT3G46820	OS03G0268000	80.4348	0.321909	0.195868
prefoldin-related KE2	AT2G07340	OS02G0462900	60.274	0.322086	0.298288
zinc ion binding	AT1G17210	OS03G0785300	48.0382	0.322599	0.0406438
NBS-LRR	AT3G14470	OS01G0178900	16.73	0.323331	0.0848747
NBS-LRR	AT3G14470	OS01G0178900	16.73	0.323331	0.4232
NBS-LRR	AT3G14470	OS06G0667900	21.0884	0.323331	0.238577
NBS-LRR	AT3G14470	OS04G0111900	26.6606	0.323331	0.16824
NBS-LRR	AT3G14470	OS07G0273600	27.9817	0.323331	0.313286
NBS-LRR	AT3G14470	OS09G0314200	29.5432	0.323331	0.216137
-	AT4G35905	OS10G0438700	45.8333	0.324367	0.0685056
SWIB complex BAF60b	AT1G49520	OS03G0764450	24.2105	0.325565	0.0273438
-	AT1G57680	OS04G0443700	31.3539	0.325619	0.119896
SOB7	AT1G17060	OS01G0627500	7.45698	0.325727	0.00191364
SOB7	AT1G17060	OS01G0627600	30.6024	0.325727	0.005295
SOB7	AT1G17060	OS01G0627800	37.4532	0.325727	0.00720461
SOB7	AT1G17060	OS01G0627400	37.5451	0.325727	0.202291
SOB7	AT1G17060	OS05G0372300	38.1503	0.325727	0.0294148
SOB7	AT1G17060	OS01G0628700	38.6064	0.325727	0.105163
SOB7	AT1G17060	OS01G0728300	39.6917	0.325727	0.083566
ankyrin repeat	AT3G01750	OS03G0695400	38.2716	0.328084	0.227196
GATL3	AT1G13250	OS04G0530900	63.3431	0.328238	0.0234006
protein binding	AT1G78420	OS06G0154900	45.8333	0.328862	0.277887
CSLB02	AT2G32620	OS04G0429500	33.6673	0.329558	0.0457301
SPL9	AT2G42200	OS09G0491532	28.1734	0.330805	0.113048
SPL9	AT2G42200	OS08G0509600	29.0168	0.330805	0.0317432
FER	AT3G51550	OS03G0333200	63.7178	0.330831	0.439555
FER	AT3G51550	OS01G0769700	64.3973	0.330831	0.0261474
WLIM1	AT1G10200	OS12G0510900	71.2871	0.336297	0.00696988
CDK-activating kinase assembly factor	AT4G30820	OS06G0171700	49.2308	0.336556	0.0252425
-	AT2G37975	OS03G0331900	34.0741	0.337467	0.417209
DD46	AT1G22015	OS09G0452900	61.3232	0.339144	0.0889583
nucleic acid binding	AT5G05100	OS05G0411600	39.7015	0.340182	0.0768111
UGT76C2	AT5G05860	OS03G0824600	29.9795	0.341472	0.0997977
UGT76C2	AT5G05860	OS11G0441500	37.3932	0.341472	0.0645999
UGT76C2	AT5G05860	OS07G0241800	38.2096	0.341472	0.0289144
UGT76C2	AT5G05860	OS07G0241800	38.2096	0.341472	0.036019
UGT76C2	AT5G05860	OS07G0241500	40.9563	0.341472	0.129458
RBP37	AT4G10610	OS08G0116400	64.5695	0.34219	0.029836
RBP37	AT4G10610	OS08G0116400	64.5695	0.34219	0.248129
voltage-gated anion channel	AT5G37610	OS01G0588200	16.3636	0.342214	0.0481074
-	AT1G27930	OS11G0490100	45.6954	0.343124	0.990196
oxidoreductase	AT5G37980	OS12G0225900	58.2609	0.344159	0.088397
oxidoreductase	AT5G37980	OS12G0225900	58.2609	0.344159	0.459943
-	AT5G46790	OS10G0573400	55.1887	0.344706	0.154592
NPH3	AT5G66560	OS03G0767600	47.877	0.345389	0.0189362
MATE efflux	AT1G61890	OS07G0516600	56.1866	0.345844	0.789073
MATE efflux	AT1G61890	OS03G0571900	61.1538	0.345844	0.158453
MATE efflux	AT1G61890	OS03G0572900	61.6	0.345844	0.140216
PDS1	AT1G06570	OS02G0168100	70.2929	0.346675	0.00947557
FH2	AT5G07760	OS07G0596300	35.6275	0.347363	0.359172
-	AT3G62450	OS12G0106550	65.2174	0.347709	0.137048
-	AT1G14990	OS01G0606050	80.3279	0.348209	0.208469
SUF4	AT1G30970	OS09G0560900	54.6479	0.351108	0.140131
transducin	AT5G14050	OS07G0603200	57.8097	0.351442	0.407599
VTC1	AT2G39770	OS01G0847200	86.9806	0.351767	0.13317
VTC1	AT2G39770	OS08G0237200	86.9806	0.351767	0.13317
-	AT2G45860	OS02G0824400	69.6203	0.351767	0.0865121
hydrolase	AT1G66250	OS03G0221500	64.2857	0.352387	0.0657683
WIP3	AT3G13360	OS09G0481300	14.9905	0.355531	0.11715
WIP3	AT3G13360	OS04G0471300	18.8742	0.355531	0.169746
hydrolase	AT3G48410	OS02G0532300	51.0753	0.355716	0.639198
emb2394	AT1G05190	OS03G0356300	65.4867	0.358373	0.236251
emb2394	AT1G05190	OS03G0751400	66.3717	0.358373	0.0970355
ACP5	AT5G27200	OS12G0534200	43.0556	0.358723	0.0126508
ACP5	AT5G27200	OS08G0549300	43.4783	0.358723	0.0848438
transducin	AT5G43920	OS10G0465000	33.1933	0.359739	0.0618955
transducin	AT5G43920	OS10G0465000	33.1933	0.359739	0.310489
MSI1	AT5G58230	OS03G0640100	85.514	0.359981	0.095931
lipase	AT2G04570	OS06G0636700	45.5497	0.363535	0.0153577
lipase	AT2G04570	OS02G0189200	46.4191	0.363535	0.675337
lipase	AT2G04570	OS09G0132900	48.2955	0.363535	0.709195
PDC2	AT5G54960	OS01G0160100	78.2245	0.366285	0.00982937
ISA3	AT4G09020	OS09G0469400	67.2566	0.367132	0.107932
-	AT2G43780	OS12G0611700	30.137	0.367998	0.104349
-	AT3G17900	OS03G0152800	42.7578	0.368095	0.0514502
fructose-bisphosphate aldolase	AT2G36460	OS05G0402700	78.0781	0.368604	0.0636134
fructose-bisphosphate aldolase	AT2G36460	OS08G0120600	80.663	0.368604	0.612292
WPP1	AT5G43070	OS03G0209000	31.6129	0.370524	0.115717
-	AT4G35987	OS03G0243800	48.8506	0.37111	0.080951
glycine-rich	AT5G11700	OS01G0187400	64.0112	0.37164	0.0133518
glycine-rich	AT5G11700	OS01G0187400	64.0112	0.37164	0.084577
glycine-rich	AT5G11700	OS05G0185650	65.5462	0.37164	0.159081
GR1	AT3G25530	OS02G0562700	78.4983	0.371752	0.0837457
zinc finger	AT3G48760	OS08G0535400	55.2885	0.371845	0.12984
GH9B8	AT2G32990	OS08G0425300	57.4669	0.373527	0.404629
GH9B8	AT2G32990	OS09G0394300	60.0907	0.373527	0.261796
CBS	AT5G10860	OS03G0737000	71.9807	0.374863	0.15443
CBS	AT5G10860	OS03G0737000	71.9807	0.374863	0.345169
CHC1	AT5G14170	OS04G0382100	73.4104	0.375841	0.0476646
MIOX2	AT2G19800	OS06G0561000	71.4286	0.376384	0.0973895
tetracycline transporter	AT2G16980	OS02G0667500	34.2508	0.376384	0.148258
-	AT5G57370	OS02G0461600	40.9692	0.376384	0.259197
BTB	AT2G46260	OS06G0507300	41.791	0.379179	0.00383955
BTB	AT2G46260	OS02G0260700	59.319	0.379179	0.0591126
BTB	AT2G46260	OS06G0507400	63.2463	0.379179	0.00958044
-	AT3G49890	OS03G0201200	37.3391	0.379179	0.083716
DNAJ	AT5G59610	OS03G0822800	34.0909	0.380445	0.272617
anac017	AT1G34190	OS09G0493700	19.943	0.384427	0.0236993
RABG3C	AT3G16100	OS01G0227300	88.4058	0.385202	0.0144339
UBP8	AT5G22030	OS07G0160000	45.0847	0.385777	0.321328
LTP	AT2G13820	OS03G0192600	30.8057	0.386352	0.019017
LTP	AT2G13820	OS03G0192600	30.8057	0.386352	0.0365405
AP3	AT3G54340	OS06G0712700	36.1607	0.38879	0.072932
LTP6	AT3G08770	OS05G0477900	37.3494	0.388938	0.911795
SWP	AT3G04740	OS08G0333000	65.8974	0.389699	0.00777939
SWP	AT3G04740	OS08G0333000	65.8974	0.389699	0.00818441
kinase	AT3G56050	OS12G0105800	32.9193	0.390529	0.561346
kinase	AT3G56050	OS07G0693000	36.4	0.390529	0.0101669
kinase	AT3G56050	OS03G0294800	39.4	0.390529	0.0548362
glucosyl transferase	AT1G05670	OS07G0513200	38.8594	0.392566	0.682078
ubiquitin fusion degradation UFD1	AT2G29070	OS01G0144500	38.9344	0.392566	0.431944
LEJ2	AT4G36910	OS09G0115500	55.0661	0.39289	0.156965
-	AT3G44280	OS07G0250300	42.9907	0.393485	0.170744
-	AT3G44280	OS02G0536100	50	0.393485	0.0260254
UPL5	AT4G12570	OS09G0484300	36.2089	0.393717	0.162067
TF	AT4G25210	OS09G0451700	21.1111	0.394364	0.0986121
RPP3A	AT4G25890	OS01G0231700	61.3445	0.398741	0.152164
RPP3A	AT4G25890	OS01G0231700	61.3445	0.398741	0.879751
RPP3A	AT4G25890	OS06G0701400	61.3445	0.398741	0.271846
protein binding	AT4G34100	OS06G0639100	65.625	0.398941	0.115335
calcium-binding EF hand	AT5G04170	OS11G0140600	65.9091	0.399447	0.0216213
calcium-binding EF hand	AT5G04170	OS12G0137100	69.863	0.399447	0.0216213
calcium-binding EF hand	AT5G04170	OS12G0137100	69.863	0.399447	0.0396021
carbohydrate transmembrane transporter/ sugar:hydrogen symporter	AT4G21480	OS03G0594400	56.705	0.399522	0.217408
carbohydrate transmembrane transporter/ sugar:hydrogen symporter	AT4G21480	OS07G0106200	63.7066	0.399522	0.116564
oxoglutarate decarboxylase	AT5G65750	OS07G0695800	81.0516	0.399571	0.0408982
oxoglutarate decarboxylase	AT5G65750	OS04G0390000	82.5787	0.399571	0.294784
oxoglutarate decarboxylase	AT5G65750	OS04G0390000	82.5787	0.399571	0.477822
kinase	AT4G00960	OS07G0537600	23.3383	0.400443	0.0952209
kinase	AT4G00960	OS07G0538700	23.9354	0.400443	0.121693
kinase	AT4G00960	OS07G0538200	24.3205	0.400443	0.134594
kinase	AT4G00960	OS07G0541800	24.8869	0.400443	0.682185
kinase	AT4G00960	OS07G0542400	25.1185	0.400443	0.295449
kinase	AT4G00960	OS07G0540100	26.0057	0.400443	0.0317915
kinase	AT4G00960	OS07G0542600	27.0049	0.400443	0.51662
kinase	AT4G00960	OS07G0538400	49.1228	0.400443	0.149759
kinase	AT4G00960	OS10G0326900	50	0.400443	0.178016
nuclear ZAP	AT5G62760	OS02G0215000	37.8747	0.402239	0.115927
MDF	AT5G16780	OS02G0511500	57.4713	0.402766	0.133873
peptidyl-prolyl cis-trans isomerase cyclophilin-type	AT5G13120	OS05G0103200	63.6	0.403185	0.221657
CYP81D4	AT4G37330	OS12G0582666	36.1404	0.403898	0.426725
CYP81D4	AT4G37330	OS03G0760200	42.3002	0.403898	0.0407963
BOR4	AT1G15460	OS01G0175600	63.9881	0.404923	0.0358743
BOR4	AT1G15460	OS01G0175700	64.5833	0.404923	0.127463
zinc finger	AT3G14320	OS05G0360400	18	0.406252	0.286007
zinc finger	AT3G14320	OS06G0192800	18.3801	0.406252	0.105693
zinc finger	AT3G14320	OS05G0164200	21.3483	0.406252	0.0771518
calmodulin-binding	AT3G29310	OS05G0512400	23.1707	0.406258	0.057119
UPL4	AT5G02880	OS05G0463900	55.8226	0.411038	0.0557053
helicase	AT1G79890	OS05G0219800	51.8354	0.413395	0.0784525
RNA-binding cp29	AT2G37220	OS03G0376600	61.5094	0.414203	0.945858
HDT3	AT5G03740	OS01G0909500	21.6102	0.41583	0.207322
ftsh4	AT2G26140	OS01G0574500	75.5245	0.417316	0.19688
RRM	AT2G16940	OS03G0153000	67.9487	0.417385	0.388304
CC-NBS-LRR	AT1G63350	OS03G0254000	24.2358	0.419416	0.23775
P4H-2	AT3G06300	OS05G0489100	56.1129	0.420116	0.0111164
kinase	AT3G26700	OS01G0929200	51.6483	0.420288	0.225973
PIP	AT2G14260	OS05G0513900	78.629	0.420288	0.228736
SAC1	AT1G22620	OS08G0109100	66.4792	0.420288	0.0749985
ARI1	AT4G34370	OS03G0625800	43.1481	0.422205	0.0894089
TRP1	AT5G59430	OS02G0817800	18.8366	0.422414	0.102812
kinase	AT5G50000	OS01G0641000	75.7732	0.422859	0.106698
kinase	AT5G50000	OS05G0577700	78.2152	0.422859	0.0458728
binding	AT5G42340	OS06G0726900	46.5789	0.423364	0.963387
kinase	AT1G67580	OS04G0488000	58.5915	0.425885	0.0493676
POT	AT2G37900	OS03G0823500	54.0171	0.425943	0.108243
protein binding	AT1G30860	OS07G0499800	16.3564	0.427214	0.124817
myb	AT3G10580	OS01G0863300	46.6216	0.428403	0.024379
-	AT1G68610	OS02G0579800	46.9136	0.42994	0.398841
RAPTOR2	AT5G01770	OS11G0109933	56.0674	0.430436	0.195493
RAPTOR2	AT5G01770	OS12G0110000	61.7552	0.430436	0.195493
RAPTOR2	AT5G01770	OS12G0110000	61.7552	0.430436	0.828164
PPR	AT2G16880	OS03G0201400	35.9296	0.430484	0.0309679
EXPL3	AT3G45960	OS03G0132200	48.3871	0.43083	0.0930566
kinase	AT4G29990	OS01G0810800	22.8388	0.431179	0.494387
kinase	AT4G29990	OS12G0567500	35.4209	0.431179	0.942704
-	AT5G09995	OS06G0225400	24.898	0.433234	0.442601
potassium ion transmembrane transporter	AT4G19960	OS09G0563200	65.826	0.433806	0.0100671
scpl42	AT5G42240	OS11G0213600	71.1828	0.435649	0.230592
-	AT5G60150	OS11G0103100	19.1892	0.43764	0.172345
-	AT5G60150	OS12G0102700	22.3587	0.43764	0.172345
F-box	AT5G15710	OS04G0668600	64.2857	0.437929	0.216818
HSP17.4	AT3G46230	OS03G0267000	68.323	0.44119	0.0800834
HSP17.4	AT3G46230	OS03G0267000	68.323	0.44119	0.12092
HSP17.4	AT3G46230	OS03G0266300	68.9441	0.44119	0.0219958
isocitrate dehydrogenase	AT5G03290	OS01G0276100	81.768	0.441723	0.127096
AGP22	AT5G53250	OS05G0217000	44.7761	0.442417	0.417316
AGP22	AT5G53250	OS02G0264800	45.2055	0.442417	0.0840026
AGP22	AT5G53250	OS06G0505700	52.5	0.442417	0.0540545
AGO5	AT2G27880	OS02G0616300	35.6495	0.442453	0.0937176
AGO5	AT2G27880	OS02G0616300	35.6495	0.442453	0.413988
methyladenine glycosylase	AT3G12710	OS01G0799500	38.6189	0.442558	0.00982937
histone H2B	AT2G37470	OS01G0152700	97.561	0.442675	0.416855
-	AT1G11540	OS01G0786800	38.4793	0.442675	0.0489593
OFP13	AT5G04820	OS11G0156300	24.9267	0.443221	0.945581
OFP13	AT5G04820	OS01G0863800	34.8361	0.443221	0.388591
SIZ1	AT5G60410	OS05G0125000	50.5143	0.445472	0.0778637
protein binding	AT4G39140	OS01G0261100	28.0742	0.447325	0.106678
GEX1	AT5G55490	OS07G0668100	32.3607	0.447504	0.0649322
GEX1	AT5G55490	OS07G0668100	32.3607	0.447504	0.105249
SYP52	AT1G79590	OS02G0119400	62.069	0.451546	0.11259
CBL9	AT5G47100	OS10G0564800	79.3427	0.451556	0.023885
-	AT4G33100	OS09G0361700	26.3566	0.452577	0.0513546
-	AT4G33100	OS09G0361700	26.3566	0.452577	0.0998003
-	AT4G33100	OS09G0361700	26.3566	0.452577	0.673276
SWAP	AT1G18050	OS02G0245000	4.0404	0.453662	0.06889
heavy-metal-associated	AT2G35730	OS01G0927300	26.2411	0.455339	0.335879
heavy-metal-associated	AT2G35730	OS01G0927300	26.2411	0.455339	0.340177
zinc finger	AT1G13195	OS01G0905700	45.2381	0.455627	0.0261474
helicase	AT5G07810	OS07G0598300	46.6437	0.457369	0.0417464
helicase	AT5G07810	OS07G0598300	46.6437	0.457369	0.0486542
-	AT3G26580	OS03G0428800	60.101	0.458347	0.110588
-	AT3G26580	OS03G0428800	60.101	0.458347	0.497069
MPK6	AT2G43790	OS06G0154500	84.1709	0.460057	0.213986
-	AT4G11450	OS03G0105800	25.3373	0.460057	0.0244813
RBK1	AT5G10520	OS06G0663900	41.6216	0.460273	0.103004
helicase	AT2G35920	OS10G0471350	72.0441	0.460542	0.0510572
ketol-acid reductoisomerase	AT3G58610	OS05G0573700	81.4879	0.461842	0.0546305
ketol-acid reductoisomerase	AT3G58610	OS01G0652600	85.9489	0.461842	0.198335
AL7	AT1G14510	OS02G0564100	62.5468	0.463455	0.117918
-	AT4G23890	OS07G0196200	46.5306	0.464329	0.02622
C2	AT2G01540	OS07G0500300	40.4624	0.466554	0.0457174
importin alpha-1 subunit	AT1G32880	OS01G0343200	14.8936	0.46735	0.0201973
IXR1	AT5G05170	OS07G0208500	80.481	0.467547	0.0457806
-	AT5G08440	OS05G0100900	41.4667	0.469145	0.0941123
acid phosphatase survival SurE	AT4G14930	OS07G0204500	48.5246	0.470273	0.134068
FBL19	AT4G30640	OS08G0269800	32.9032	0.471501	0.22994
ZIK5	AT3G18750	OS11G0160300	50.3417	0.472472	0.0324654
ZIK5	AT3G18750	OS12G0162100	50.3597	0.472472	0.0518084
ZIK5	AT3G18750	OS12G0162100	50.3597	0.472472	0.112067
oxidoreductase	AT1G20270	OS02G0827100	87.5	0.475293	0.323245
-	AT2G44260	OS03G0721300	40.1042	0.475293	0.0188719
AN1-like	AT3G12630	OS09G0486500	47.561	0.47589	0.0789068
acid phosphatase	AT4G25150	OS06G0139800	49.8294	0.479631	0.0514653
NR1	AT1G77760	OS02G0770800	65.2418	0.480284	0.0301183
zinc finger	AT2G47680	OS01G0256800	49.4538	0.480825	0.127555
zinc finger	AT2G47680	OS01G0256800	49.4538	0.480825	0.151607
inositol 1,3,4-trisphosphate 5/6-kinase	AT4G33770	OS10G0103800	56.4972	0.481428	0.206197
inositol 1,3,4-trisphosphate 5/6-kinase	AT4G33770	OS03G0726200	59.3838	0.481428	0.180207
kinase	AT3G59110	OS01G0664200	60.1626	0.48213	0.174677
aminotransferase class I and II	AT1G77670	OS09G0453800	71.8884	0.482256	0.0490618
F-box	AT1G23780	OS03G0232000	25.2632	0.483363	0.0557053
PRLI-interacting factor	AT2G13690	OS07G0259700	37.766	0.48337	0.061214
PRLI-interacting factor	AT2G13690	OS04G0278000	38.3302	0.48337	0.00798075
ICL	AT3G21720	OS07G0529000	77.972	0.486072	0.353608
aldo/keto reductase	AT3G53880	OS05G0456300	65.3374	0.486888	0.0311774
zinc finger	AT3G56930	OS12G0131200	45.0526	0.487704	0.203778
zinc finger	AT3G56930	OS11G0133800	45.4158	0.487704	0.203778
protein binding	AT1G27700	OS03G0207200	29.9451	0.488475	0.0132838
protein binding	AT1G27700	OS10G0343100	34.0599	0.488475	0.059576
ATHB16	AT4G40060	OS10G0377300	27.541	0.4917	0.538135
ATHB16	AT4G40060	OS08G0481400	41.6357	0.4917	0.103049
ATHB16	AT4G40060	OS09G0470500	43.3213	0.4917	0.059576
nodulin MtN21	AT1G43650	OS07G0527300	33.1169	0.4917	0.920789
MAP70-3	AT2G01750	OS12G0640900	68.9594	0.49181	0.0158825
MAP70-3	AT2G01750	OS02G0736100	69.783	0.49181	0.0700938
lipase	AT5G24210	OS02G0286200	35.2436	0.492263	0.135638
VHA-A3	AT4G39080	OS10G0184300	80.9524	0.49249	0.142853
AAA-type ATPase	AT1G02890	OS07G0672500	51.8964	0.492801	0.147063
kinase	AT4G02630	OS04G0430000	68.1672	0.493071	0.0194848
APO1	AT1G64810	OS04G0615500	54.4811	0.495697	0.144721
ROPGEF6	AT3G55660	OS05G0454200	46.6549	0.498911	0.0667502
CCCH-type	AT2G41900	OS12G0515500	51.2116	0.502232	0.134505
CDS1	AT1G62430	OS10G0327300	67.907	0.503489	0.0400994
RCY1	AT2G26430	OS01G0377500	60.6557	0.503954	0.0284634
SULTR4;2	AT3G12520	OS09G0240500	64.2961	0.504978	0.227492
AAPT2	AT3G25585	OS02G0119800	75.0643	0.5062	0.276465
DNA repair RAD23	AT5G38470	OS09G0407200	55.6122	0.507097	0.175884
DNA repair RAD23	AT5G38470	OS08G0430200	56.8966	0.507097	0.00907143
antiporter/ drug transporter/ transporter	AT2G04070	OS01G0504500	41.2351	0.509638	0.357533
antiporter/ drug transporter/ transporter	AT2G04070	OS05G0554000	45.5882	0.509638	0.0125922
antiporter/ drug transporter/ transporter	AT2G04070	OS05G0554000	45.5882	0.509638	0.425383
PPR	AT4G25270	OS03G0852700	40.9709	0.510462	0.23886
Sm D1	AT3G07590	OS02G0586500	90.3509	0.510508	0.159974
-	AT1G21810	OS12G0169100	18.5606	0.51131	0.0384987
-	AT1G21810	OS07G0506600	22.0828	0.51131	0.0420659
HSP17.6A	AT5G12030	OS02G0217900	44	0.511957	0.176379
OPR3	AT2G06050	OS08G0459600	71.3198	0.512746	0.0865396
emb1974	AT3G07060	OS08G0135300	33.0935	0.513638	0.0289457
kinase	AT2G43230	OS03G0844100	74.1848	0.514251	0.163187
kinase	AT1G07870	OS03G0283900	46.77	0.514402	0.0497257
RSW1	AT4G32410	OS05G0176100	80.855	0.515663	0.0606057
XPO1A	AT5G17020	OS03G0858100	83.1776	0.51603	0.0581429
SPL11	AT1G27360	OS02G0174100	31.8725	0.516983	0.039214
IMPA1	AT3G06720	OS01G0343200	60.461	0.518782	0.0201973
hydrolase	AT5G40270	OS01G0109300	60.2823	0.519223	0.0425639
FAD2	AT3G12120	OS07G0417200	58.6387	0.519583	0.203206
FAD2	AT3G12120	OS07G0416900	58.9744	0.519583	0.160667
FAD2	AT3G12120	OS02G0716500	68.0412	0.519583	0.0813303
protein binding	AT3G48070	OS02G0580800	32.7044	0.519848	0.108525
protein binding	AT3G48070	OS02G0580800	32.7044	0.519848	0.168046
protein binding	AT3G48070	OS04G0463700	35.1682	0.519848	0.661235
hnRNP	AT4G14300	OS10G0470900	51.2931	0.521338	0.107755
hnRNP	AT4G14300	OS10G0470900	51.2931	0.521338	0.13555
ribosome	AT1G06380	OS04G0500200	25.2174	0.521338	0.0313712
ZIP6	AT2G30080	OS05G0164800	51.6456	0.52183	0.0868448
ATHB6	AT2G22430	OS10G0377300	28.5246	0.522073	0.538135
ATHB6	AT2G22430	OS08G0481400	42.7509	0.522073	0.103049
ATHB6	AT2G22430	OS09G0470500	45.1264	0.522073	0.059576
DNAJ	AT2G42080	OS07G0470800	38.189	0.523377	0.076754
HSFA1E	AT3G02990	OS03G0854500	42.6877	0.524985	0.263136
-	AT1G62930	OS04G0351333	17.2924	0.526065	0.02155
-	AT1G62930	OS04G0351333	17.2924	0.526065	0.130489
-	AT1G62930	OS04G0350000	19.7128	0.526065	0.53625
-	AT1G62930	OS04G0349600	21.9638	0.526065	0.130489
-	AT1G62930	OS04G0349600	21.9638	0.526065	0.221657
-	AT1G62930	OS10G0497300	23.8035	0.526065	0.0550624
-	AT1G62930	OS10G0497300	23.8035	0.526065	0.120312
-	AT1G62930	OS08G0248400	29.7727	0.526065	0.877591
-	AT1G62930	OS10G0495100	31.8872	0.526065	0.224773
SIZ1	AT5G60410	OS05G0125000	50.5143	0.526581	0.0778637
BTB/POZ	AT5G19330	OS05G0398100	72.7679	0.527761	0.0967587
BTB/POZ	AT5G19330	OS05G0398100	72.7679	0.527761	0.248477
PUB13	AT3G46510	OS03G0275900	49.8623	0.527871	0.195729
PUB13	AT3G46510	OS03G0275900	49.8623	0.527871	0.249548
PUB13	AT3G46510	OS12G0570000	59.5745	0.527871	0.188979
long-chain acyl-CoA synthetase	AT4G11030	OS01G0681200	67.6692	0.528635	0.0729492
long-chain acyl-CoA synthetase	AT4G11030	OS01G0681200	67.6692	0.528635	0.100305
UBP2	AT1G04860	OS08G0527100	19.3952	0.528982	0.0389635
UBP2	AT1G04860	OS08G0527600	22.7586	0.528982	0.0212427
UBP2	AT1G04860	OS09G0505100	25.9716	0.528982	0.169806
PAP3	AT1G14700	OS11G0549615	51.3605	0.529322	0.656541
ZCF125	AT1G59540	OS11G0552600	44.2935	0.533268	0.0952209
DNA-binding S1FA	AT2G37120	OS04G0408700	57.5	0.534137	0.330644
ECT6	AT3G17330	OS01G0329800	23.3051	0.534675	0.240977
ECT6	AT3G17330	OS03G0317000	27.7856	0.534675	0.0367886
quinone binding	AT1G31690	OS06G0338200	46.9914	0.535961	0.182751
kinase	AT2G31010	OS02G0241600	59.6203	0.536346	0.107436
chromatin binding	AT1G02740	OS11G0545600	39.6341	0.536362	0.0478336
tolA	AT1G61410	OS03G0740800	22.9927	0.536534	0.895429
OHP	AT5G02120	OS12G0480100	51.3274	0.53869	0.0688527
HAP13	AT1G60780	OS05G0543100	85.3488	0.539374	0.0461613
HAP13	AT1G60780	OS01G0703600	88.1119	0.539374	0.0405865
HTA13	AT3G20670	OS07G0545400	85.1852	0.539374	0.0970043
VND1	AT2G18060	OS10G0532000	53.9589	0.539374	0.0626426
FUS3	AT3G26790	OS01G0713600	30.1038	0.542	0.0556403
hydrolase	AT5G16870	OS04G0652900	45.4918	0.542689	0.162672
lipid-associated	AT4G39730	OS04G0456700	40.9326	0.544399	0.0451564
lipid-associated	AT4G39730	OS02G0753300	43.5233	0.544399	0.126255
SOL2	AT5G13290	OS01G0927500	48.5507	0.545808	0.228844
SOL2	AT5G13290	OS01G0927500	48.5507	0.545808	0.26983
NEK3	AT5G28290	OS03G0636800	57.596	0.54618	0.14405
-	AT5G11780	OS01G0600300	26.145	0.547776	0.141465
TFCA	AT2G30410	OS02G0816500	83.3333	0.547851	0.072388
FHA	AT2G45460	OS03G0127600	40.8371	0.547941	0.00742267
ATPC2	AT1G15700	OS07G0513000	63.4078	0.54899	0.041337
LCB2	AT5G23670	OS01G0928600	70.7415	0.549586	0.159741
LCB2	AT5G23670	OS01G0928700	76.4588	0.549586	0.896873
LCB2	AT5G23670	OS11G0516000	81.3525	0.549586	0.151019
LCB2	AT5G23670	OS01G0928800	81.5951	0.549586	0.0577682
-	AT4G39790	OS09G0368900	33.6735	0.551501	0.147606
SDR	AT3G01980	OS03G0850000	47.2924	0.552809	0.0837915
RAB18	AT5G66400	OS01G0702500	33.5106	0.556153	0.0088278
-	AT4G35980	OS05G0352800	54.1176	0.556695	0.0360228
-	AT3G50640	OS02G0762600	26.1438	0.559084	0.0323433
-	AT3G50640	OS09G0459200	27.3885	0.559084	0.214588
EPR1	AT1G18330	OS06G0728700	28.6031	0.559269	0.0925963
ABC	AT5G13580	OS01G0836600	60.4806	0.559371	0.367214
ABC	AT5G13580	OS05G0120200	62.6609	0.559371	0.52618
VAMP712	AT2G25340	OS02G0803600	65.9292	0.559611	0.206403
VAMP712	AT2G25340	OS06G0174400	69.2308	0.559611	0.0360068
VAMP712	AT2G25340	OS06G0174400	69.2308	0.559611	0.13039
APUM12	AT5G56510	OS11G0579900	25.7373	0.56265	0.0805957
BPC4	AT2G21240	OS06G0130600	40.7855	0.564379	0.0208468
nucleotidyltransferase	AT2G45620	OS10G0188300	62.6344	0.565671	0.600696
LSU1	AT3G49580	OS02G0129800	39.2157	0.567714	0.037589
-	AT5G16790	OS05G0569800	60.9053	0.567714	0.0353779
-	AT5G23920	OS10G0548100	26.3538	0.568805	0.341531
PPR	AT5G08510	OS06G0125600	39.403	0.570601	0.0470691
prefoldin-related KE2	AT2G07340	OS02G0462900	60.274	0.571254	0.298288
SNL4	AT1G70060	OS01G0109700	50.6033	0.572436	0.15793
RBOHB	AT1G09090	OS12G0541300	54.1254	0.573492	0.399324
RBOHB	AT1G09090	OS01G0360200	55.6906	0.573492	0.0309823
thioesterase	AT3G61200	OS07G0462700	34.8837	0.574527	0.00497727
-	AT3G28700	OS01G0588800	65.6746	0.577121	0.0215175
-	AT3G28700	OS01G0588800	65.6746	0.577121	0.0234006
-	AT3G28700	OS01G0588800	65.6746	0.577121	0.0453816
TOP1ALPHA	AT5G55310	OS08G0154600	52.8384	0.577921	0.0183562
-	AT5G62090	OS06G0126000	35.0365	0.578279	0.441275
chaperonin	AT1G24510	OS06G0562600	88.0374	0.579851	0.227563
binding	AT3G59020	OS02G0474700	70.3704	0.583518	0.156607
binding	AT3G59020	OS02G0474700	70.3704	0.583518	0.259139
binding	AT3G59020	OS02G0474700	70.3704	0.583518	0.5064
ECT11	AT1G09810	OS04G0129300	20.7407	0.583518	0.0716092
HTB4	AT5G59910	OS01G0152700	100	0.584023	0.416855
-	AT2G36630	OS03G0726500	59.7895	0.585638	0.0279108
-	AT2G01640	OS12G0244500	46.1078	0.587731	0.160201
UTR1	AT2G02810	OS06G0593100	66.7598	0.587817	0.21763
methyltransferase	AT1G78140	OS08G0411200	49.162	0.589833	0.391788
-	AT4G15790	OS12G0541400	29.798	0.591871	0.36547
-	AT4G25030	OS07G0159500	40.4358	0.592047	0.929418
-	AT4G25030	OS06G0115800	44.523	0.592047	0.480436
-	AT4G25030	OS10G0580900	56.25	0.592047	0.058327
CKL11	AT4G14340	OS02G0810400	70.1299	0.593681	0.0979263
TPLATE	AT3G01780	OS02G0793100	69.4974	0.594831	0.0234198
TPLATE	AT3G01780	OS11G0175900	76.3192	0.594831	0.0981721
BolA-like	AT5G09830	OS01G0866600	61.6438	0.597404	0.0752431
mitochondrial phosphate transporter	AT5G14040	OS06G0210500	75	0.598661	0.0479832
mitochondrial phosphate transporter	AT5G14040	OS04G0448800	78.6111	0.598661	0.0590247
IMB1	AT2G34900	OS06G0138000	50.8064	0.600536	0.192271
RRM	AT4G00830	OS10G0151800	46.1187	0.600536	0.0592767
RRM	AT4G00830	OS11G0250000	54.4218	0.600536	0.0822933
RRM	AT4G00830	OS11G0250000	54.4218	0.600536	0.224947
-	AT2G41770	OS05G0391200	65.2747	0.604294	0.0448227
calnexin	AT5G07340	OS04G0402100	67.4115	0.604495	0.205106
CYCA1;1	AT1G44110	OS05G0237100	67.0051	0.607804	0.119202
UGT75B2	AT1G05530	OS05G0179950	29.4118	0.607867	0.0941131
UGT75B2	AT1G05530	OS05G0179950	29.4118	0.607867	0.104119
UGT75B2	AT1G05530	OS11G0145200	29.8755	0.607867	0.00931264
WD-40 repeat	AT1G61210	OS01G0531300	43.2432	0.608171	0.0101141
WD-40 repeat	AT1G61210	OS01G0780400	43.9141	0.608171	0.0101141
ELF5A-1	AT1G13950	OS12G0507200	88.75	0.610163	0.295942
-	AT3G60480	OS04G0549400	38.6139	0.610163	0.00245669
PAP85	AT3G22640	OS03G0793700	23.8298	0.612743	0.30977
nucleic acid binding	AT1G76010	OS09G0542000	58.3643	0.615048	0.170758
hydrolase	AT5G20940	OS01G0771900	63.3484	0.616506	0.0556403
GTP binding	AT5G66470	OS05G0567300	73.7288	0.616718	0.216685
-	AT5G53420	OS05G0595300	38.961	0.616955	0.0129125
-	AT5G53420	OS05G0595300	38.961	0.616955	0.0266064
-	AT5G53420	OS05G0595300	38.961	0.616955	0.0376945
CAT2	AT1G58030	OS12G0623500	67.1498	0.617215	0.199571
ARF GTPase activator/ zinc ion binding	AT4G32630	OS02G0208900	25.1374	0.617988	0.102431
SCPL7	AT3G10450	OS10G0101200	38.3475	0.619102	0.185533
SCPL7	AT3G10450	OS10G0101200	38.3475	0.619102	0.289503
SCPL7	AT3G10450	OS12G0581400	40.7792	0.619102	0.220333
SCPL7	AT3G10450	OS11G0643400	41.7495	0.619102	0.487674
SCPL7	AT3G10450	OS11G0432900	42.1712	0.619102	0.249077
SCPL7	AT3G10450	OS11G0461000	43.7882	0.619102	0.735902
NDPK2	AT5G63310	OS12G0548300	60	0.62133	0.0190207
tyrosine decarboxylase	AT2G20340	OS07G0437500	70.0201	0.623811	0.178212
phosphatidate cytidylyltransferase/ transferase, transferring phosphorus groups	AT4G26770	OS10G0327300	70	0.623863	0.0400994
RPL27A	AT2G32220	OS10G0564300	72.7941	0.626498	0.466182
spermidine synthase-related	AT5G04610	OS08G0520400	33.0472	0.626982	0.0821793
-	AT5G41620	OS06G0507900	20.3647	0.627273	0.565147
-	AT5G41620	OS02G0260500	32.3944	0.627273	0.0164619
CTP synthase	AT2G34890	OS01G0616900	58.083	0.628547	0.0646379
CTP synthase	AT2G34890	OS05G0573300	65.4605	0.628547	0.0110754
CTP synthase	AT2G34890	OS05G0573300	65.4605	0.628547	0.0144275
PTAC14	AT4G20130	OS05G0587200	45.8564	0.628781	0.147895
PDF1	AT2G42840	OS02G0230300	50	0.631302	0.71637
zinc finger	AT3G43230	OS07G0272400	59.1549	0.632618	0.488861
zinc finger	AT3G43230	OS07G0616900	61.039	0.632618	0.26079
VTE2	AT2G18950	OS06G0658900	59.901	0.635933	0.0272305
VTE2	AT2G18950	OS06G0658900	59.901	0.635933	0.0531649
VTE2	AT2G18950	OS06G0658900	59.901	0.635933	0.137696
kinase	AT1G51880	OS01G0810800	22.7321	0.637554	0.494387
kinase	AT1G51880	OS12G0567500	34.3942	0.637554	0.942704
mob1/phocein	AT5G45550	OS08G0163200	79.2857	0.637679	0.0895536
mob1/phocein	AT5G45550	OS03G0577200	93.4579	0.637679	0.0895536
cinnamoyl-CoA reductase	AT2G23910	OS10G0576900	39.4984	0.638378	0.341953
DHFR-TS	AT2G21550	OS12G0446900	52.7831	0.638932	0.166545
SDR	AT5G02540	OS01G0151700	64.486	0.638932	0.0799926
UGT71C4	AT1G07250	OS07G0510500	34.0206	0.638932	0.138273
-	AT5G41050	OS12G0472800	16.6667	0.638932	0.140933
-	AT5G41050	OS09G0508200	23.2824	0.638932	0.388304
ARFA1B	AT5G14670	OS01G0265100	96.6851	0.639046	0.0884413
ARFA1B	AT5G14670	OS01G0265100	96.6851	0.639046	0.150589
ARFA1B	AT5G14670	OS03G0811900	97.2376	0.639046	0.577628
-	AT1G79780	OS01G0725400	40.6863	0.643006	0.0255745
ACOS5	AT1G62940	OS04G0310800	67.4074	0.649606	0.985819
-	AT1G23560	OS09G0327550	41.1585	0.651066	0.0264449
PP2-A12	AT1G12710	OS02G0224900	36.7089	0.6532	0.012351
PP2-A12	AT1G12710	OS02G0224900	36.7089	0.6532	0.0897906
PP2-A12	AT1G12710	OS10G0522400	41.2121	0.6532	0.0310732
PP2-A12	AT1G12710	OS04G0571300	50.9868	0.6532	0.0514653
PP2-A12	AT1G12710	OS03G0116700	51.5152	0.6532	0.082566
-	AT1G26620	OS03G0758600	18.7595	0.653211	0.349758
-	AT2G32970	OS02G0771800	46.8116	0.654466	0.0332667
-	AT1G27595	OS01G0694300	56.0284	0.654833	0.0102231
-	AT1G27595	OS01G0694300	56.0284	0.654833	0.491717
-	AT3G21400	OS12G0540700	42.0765	0.655664	0.0645931
-	AT3G07150	OS01G0918400	18.7192	0.65724	0.0792727
PLDDELTA	AT4G35790	OS09G0543100	65.1054	0.657947	0.0367933
PLDDELTA	AT4G35790	OS09G0543100	65.1054	0.657947	0.0463958
RNA polymerase	AT2G34750	OS06G0688100	42.926	0.657947	0.584787
RNA polymerase	AT2G34750	OS06G0688100	42.926	0.657947	0.728421
-	AT4G18490	OS01G0755100	20.3679	0.659657	0.058327
-	AT4G18490	OS01G0755100	20.3679	0.659657	0.573752
protein binding	AT1G75400	OS01G0261100	38.5151	0.66035	0.106678
helicase	AT3G26560	OS06G0343100	72.5092	0.661361	0.209081
PEX5	AT5G56290	OS08G0500100	60.5978	0.661772	0.144413
lipase	AT1G28640	OS10G0394000	36.9823	0.664292	0.183303
lipase	AT1G28640	OS01G0612900	42.402	0.664292	0.168112
fimbrin-like	AT5G55400	OS02G0588300	60.0297	0.6664	0.0170555
fimbrin-like	AT5G55400	OS02G0719100	62.3229	0.6664	0.362366
CDC25	AT5G03455	OS10G0545700	49.375	0.666803	0.172584
CDC25	AT5G03455	OS03G0108000	62.3077	0.666803	0.0962674
PDE135	AT2G26510	OS12G0583900	61.1511	0.672557	0.0522196
anac082	AT5G09330	OS05G0426200	30.0668	0.672977	0.236653
HUB2	AT1G55250	OS10G0565600	49.4076	0.673511	0.172628
ATR2	AT4G30210	OS09G0558900	68.0672	0.676838	0.225205
hydrolase	AT5G01260	OS05G0446900	23.5925	0.678538	0.0346903
-	AT4G38260	OS09G0323500	49.6241	0.679838	0.116641
TIC110	AT1G06950	OS10G0492000	59.5278	0.680238	0.140422
POT	AT3G45700	OS01G0960900	38.9892	0.680697	0.00296166
-	AT1G80520	OS06G0645500	20.5882	0.680697	0.778866
Sm F	AT3G59810	OS04G0388900	73.1959	0.681026	0.369932
TIL	AT5G58070	OS02G0612900	65.641	0.684413	0.0135615
TIL	AT5G58070	OS08G0440100	67.5978	0.684413	0.139796
AFB5	AT5G49980	OS02G0759700	59.0267	0.684817	0.0332925
AFB5	AT5G49980	OS02G0759700	59.0267	0.684817	0.0932765
AFB5	AT5G49980	OS03G0187500	65.0794	0.684817	0.0337073
HEC1	AT5G67060	OS09G0455300	40.678	0.685758	0.0927456
AEX-3	AT5G35560	OS02G0777100	50.9615	0.686062	0.188501
AEX-3	AT5G35560	OS02G0777100	50.9615	0.686062	0.919531
senescence-associated	AT2G25690	OS01G0593200	26.5385	0.687457	0.0194191
senescence-associated	AT2G25690	OS01G0180400	27.6596	0.687457	0.0497004
senescence-associated	AT2G25690	OS01G0180400	27.6596	0.687457	0.169854
emb1187	AT2G26830	OS09G0438400	52.3923	0.687556	0.252609
dirigent	AT2G21100	OS11G0178800	38.6364	0.687824	0.12724
transporter	AT5G10190	OS09G0371000	56.7308	0.689541	0.821982
PUR4	AT1G74260	OS01G0888500	69.9874	0.690468	0.0110053
ORP1D	AT1G13170	OS12G0285600	69.4444	0.692139	0.0715367
SMD1	AT4G11130	OS04G0465700	55.1724	0.692796	0.752252
CXE18	AT5G23530	OS06G0306600	40	0.692893	0.0561861
PRH26	AT4G21990	OS07G0509800	62.0545	0.693675	0.101192
PRH26	AT4G21990	OS07G0509800	62.0545	0.693675	0.175925
Rho GDP-dissociation inhibitor	AT3G07880	OS06G0318300	48.5185	0.694332	0.0619018
Rho GDP-dissociation inhibitor	AT3G07880	OS06G0318300	48.5185	0.694332	0.0937176
Rho GDP-dissociation inhibitor	AT3G07880	OS06G0318300	48.5185	0.694332	0.0980291
-	AT2G18220	OS10G0495500	43.7252	0.696544	0.30544
RNA binding	AT1G33680	OS08G0110800	22.619	0.696722	0.263376
RNA binding	AT1G33680	OS08G0110800	22.619	0.696722	0.388982
HISN3	AT2G36230	OS05G0400800	74.026	0.697153	0.040649
MPK8	AT1G18150	OS06G0708000	69.6552	0.699647	0.0658231
MPK8	AT1G18150	OS01G0643800	72.4551	0.699647	0.0470691
-	AT1G52320	OS01G0500500	43.4128	0.700398	0.21798
Sm G	AT3G11500	OS07G0608700	85	0.700788	0.101094
ChaC-like	AT5G26220	OS02G0465900	65.2778	0.701058	0.0251623
XRN4	AT1G54490	OS03G0794800	57.085	0.701437	0.192874
MES15	AT1G69240	OS07G0603600	62.3656	0.704322	0.0121657
ankyrin repeat	AT5G07270	OS06G0128700	52	0.707386	0.235223
-	AT3G11620	OS01G0958800	55.7214	0.70957	0.0746632
zinc finger	AT4G31450	OS08G0241400	23.0769	0.710314	0.664697
-	AT2G41960	OS03G0226600	32.5167	0.710443	0.351844
-	AT2G41960	OS10G0105400	44.3627	0.710443	0.0969354
DNA binding	AT4G15020	OS03G0822900	37.1859	0.711075	0.0200313
DNA binding	AT4G15020	OS03G0822900	37.1859	0.711075	0.0701413
PP2C	AT3G17250	OS05G0134200	48.5861	0.711472	0.155931
PP2C	AT3G17250	OS01G0295700	50	0.711472	0.109647
RLK6	AT4G23130	OS07G0538700	34.2144	0.711507	0.121693
RLK6	AT4G23130	OS07G0537600	34.8597	0.711507	0.0952209
RLK6	AT4G23130	OS07G0538200	35.6223	0.711507	0.134594
RLK6	AT4G23130	OS07G0541800	35.8974	0.711507	0.682185
RLK6	AT4G23130	OS07G0542600	36.0065	0.711507	0.51662
RLK6	AT4G23130	OS07G0542400	36.019	0.711507	0.295449
RLK6	AT4G23130	OS07G0540100	38.6494	0.711507	0.0317915
RLK6	AT4G23130	OS10G0326900	47.4719	0.711507	0.178016
RLK6	AT4G23130	OS07G0538400	51.1696	0.711507	0.149759
WRKY28	AT4G18170	OS01G0626400	28.7599	0.712651	0.152204
-	AT1G14740	OS03G0239200	41.403	0.71318	0.0752578
peptidoglycan-binding LysM	AT5G23130	OS10G0485500	38.587	0.714481	0.0809752
HSP101	AT1G74310	OS05G0519700	83.8816	0.715251	0.102715
XYL1	AT1G68560	OS01G0130400	64.2704	0.716113	0.156927
phosphoglycerate/bisphosphoglycerate mutase	AT1G22170	OS02G0751800	69.2771	0.716945	0.0812544
binding	AT3G06670	OS01G0337600	51.8764	0.720112	0.0379648
binding	AT3G06670	OS05G0156800	52.2876	0.720112	0.326441
binding	AT3G06670	OS05G0156800	52.2876	0.720112	0.355942
binding	AT3G06670	OS05G0156800	52.2876	0.720112	0.402503
transducin	AT3G49660	OS03G0725400	63.5802	0.721418	0.622623
-	AT3G05830	OS05G0135900	53.1977	0.721622	0.267989
APK1	AT2G43850	OS02G0608500	54.1833	0.721994	0.311826
GIA1	AT2G36270	OS01G0859300	37.1517	0.723867	0.0952209
SPO11-2	AT1G63990	OS08G0156900	62.3377	0.723867	0.907627
-	AT3G15160	OS04G0626900	62.5874	0.724054	0.0239401
NAP6	AT1G32500	OS01G0127300	40.6639	0.72459	0.110004
-	AT1G44000	OS04G0692600	23.6364	0.724706	0.0654578
metallo-beta-lactamase	AT4G33540	OS02G0829500	53.0675	0.72511	0.231964
NFD5	AT4G35570	OS04G0564600	24.2424	0.728675	0.021234
NFD5	AT4G35570	OS04G0564600	24.2424	0.728675	0.0935896
NFD5	AT4G35570	OS02G0670400	31.0345	0.728675	0.0324144
RLK5	AT4G28490	OS01G0239700	52.994	0.729353	0.202162
KH quaking	AT1G09660	OS05G0419500	63.2302	0.733777	0.0659701
TMT3	AT3G51490	OS03G0128932	42.8241	0.734449	0.705445
TMT3	AT3G51490	OS03G0128932	42.8241	0.734449	0.984991
TMT3	AT3G51490	OS11G0475600	56.2748	0.734449	0.123659
TMT3	AT3G51490	OS10G0539900	61.3514	0.734449	0.00939958
TMT3	AT3G51490	OS10G0539900	61.3514	0.734449	0.0406179
TMT3	AT3G51490	OS10G0539900	61.3514	0.734449	0.102243
TMT3	AT3G51490	OS02G0229400	61.7962	0.734449	0.00849475
hydrolase	AT3G62280	OS01G0329900	38.3028	0.73902	0.0588558
AP2	AT5G67190	OS06G0166400	41.3043	0.741639	0.0231435
AP2	AT5G67190	OS06G0166400	41.3043	0.741639	0.0356956
-	AT1G71690	OS12G0204500	47.4576	0.742321	0.316576
kinase	AT4G05200	OS07G0538700	33.1865	0.742359	0.121693
kinase	AT4G05200	OS07G0537600	34.4165	0.742359	0.0952209
kinase	AT4G05200	OS07G0538200	37.7682	0.742359	0.134594
kinase	AT4G05200	OS07G0542400	37.9147	0.742359	0.295449
kinase	AT4G05200	OS07G0542600	38.2979	0.742359	0.51662
kinase	AT4G05200	OS07G0541800	38.4615	0.742359	0.682185
kinase	AT4G05200	OS07G0540100	38.9368	0.742359	0.0317915
kinase	AT4G05200	OS10G0326900	48.5955	0.742359	0.178016
kinase	AT4G05200	OS07G0538400	51.462	0.742359	0.149759
cupin	AT1G07750	OS05G0116000	68.8022	0.742448	0.0321856
RSH1	AT4G02260	OS03G0340900	60.6502	0.744259	0.173551
PP2C	AT3G02750	OS11G0417400	51.1574	0.745833	0.135002
kinesin motor	AT2G28620	OS05G0117798	60.7955	0.747208	0.0443186
-	AT4G35720	OS11G0160000	24.2215	0.749223	0.6174
LRR	AT4G23840	OS05G0212200	43.2343	0.750033	0.176802
-	AT4G22000	OS05G0114600	75	0.750033	0.143425
-	AT4G22000	OS05G0114600	75	0.750033	0.193775
-	AT1G04985	OS04G0669100	43.2292	0.750218	0.450253
LTP	AT2G10940	OS06G0643500	50.1961	0.751478	0.223376
SNL3	AT1G24190	OS01G0109700	50.6033	0.751766	0.15793
importin beta-2	AT5G53480	OS12G0568800	81.0811	0.75216	0.0951724
calmodulin-binding	AT2G18750	OS02G0177800	58.0128	0.754217	0.149223
transcription-coupled DNA repair	AT5G28740	OS07G0644300	64.6617	0.754734	0.0723899
bis(5'-adenosyl)-triphosphatase	AT5G58240	OS12G0120400	37.5	0.756977	0.0522279
bis(5'-adenosyl)-triphosphatase	AT5G58240	OS12G0120400	37.5	0.756977	0.0839543
bis(5'-adenosyl)-triphosphatase	AT5G58240	OS11G0120600	53.3019	0.756977	0.144721
NF-YA10	AT5G06510	OS03G0647600	25.7062	0.758279	0.029387
NF-YA10	AT5G06510	OS12G0618600	29.2605	0.758279	0.0637436
-	AT5G16950	OS06G0184100	35.1351	0.758279	0.0751418
tyrosine specific phosphatase	AT1G05000	OS06G0208700	38.3117	0.758885	0.029836
phosphatidylinositol-4-phosphate 5-kinase	AT1G71010	OS08G0428900	45.0307	0.759929	0.116889
Sm E	AT2G18740	OS02G0126700	94.3182	0.760313	0.272803
hydrolase	AT5G18220	OS03G0792800	59.0631	0.761256	0.32058
hydrolase	AT5G18220	OS03G0792800	59.0631	0.761256	0.415582
RNA binding	AT5G12280	OS02G0245000	16.0354	0.762262	0.06889
CAX10	AT1G54110	OS02G0306100	42.8571	0.762487	0.114538
CAX10	AT1G54110	OS08G0534350	43.75	0.762487	0.114538
CAX10	AT1G54110	OS08G0535000	43.75	0.762487	0.114538
CAX10	AT1G54110	OS09G0272500	50.6329	0.762487	0.134797
CAX10	AT1G54110	OS09G0272500	50.6329	0.762487	0.138403
CAX10	AT1G54110	OS09G0272500	50.6329	0.762487	0.169615
CAX10	AT1G54110	OS08G0533700	53.7815	0.762487	0.0430204
AP1	AT1G69120	OS12G0501700	36.9099	0.763042	0.249275
AP1	AT1G69120	OS07G0605200	48.996	0.763042	0.0289457
AP1	AT1G69120	OS07G0108900	50.9363	0.763042	0.0897822
-	AT5G22280	OS07G0250300	25.2336	0.763759	0.170744
-	AT5G22280	OS02G0536100	33.9623	0.763759	0.0260254
-	AT5G41960	OS04G0585600	33.75	0.763873	0.037589
kinase	AT3G45090	OS02G0819400	50	0.768289	0.373396
MUB4	AT3G26980	OS04G0393300	48.1481	0.770255	0.0658933
MUB4	AT3G26980	OS04G0393300	48.1481	0.770255	0.146202
-	AT3G12760	OS06G0233400	71.2	0.770331	0.0351999
ARLA1A	AT5G37680	OS02G0732500	90.2174	0.770798	0.129207
-	AT5G06930	OS09G0487200	34.6154	0.771444	0.0478594
-	AT2G41200	OS01G0955600	23.9362	0.772777	0.0917163
coatomer complex, subunit alpha	AT2G21390	OS09G0127800	78.0788	0.773328	0.0322688
coatomer complex, subunit alpha	AT2G21390	OS09G0127800	78.0788	0.773328	0.0346356
AMP-binding	AT1G77240	OS04G0674700	57.3477	0.775783	0.407858
Rap2.6L	AT5G13330	OS04G0398000	32.0896	0.777936	0.0111164
Rap2.6L	AT5G13330	OS04G0398000	32.0896	0.777936	0.324821
DNAJ	AT2G22360	OS05G0333500	66.443	0.782138	0.102463
DNAJ	AT2G22360	OS05G0334000	66.443	0.782138	0.102463
DNAJ	AT2G22360	OS05G0334400	66.443	0.782138	0.0148277
DNAJ	AT2G22360	OS05G0334400	66.443	0.782138	0.102463
FIP1	AT1G28200	OS07G0621300	42.8571	0.782632	0.0110868
FIP1	AT1G28200	OS03G0736700	45.3441	0.782632	0.120748
FIP1	AT1G28200	OS06G0218100	53.6232	0.782632	0.126665
methyltransferase	AT2G41040	OS06G0646000	56.8116	0.782632	0.0732441
zinc finger	AT3G27330	OS08G0121900	44.5205	0.784074	0.111108
TBP1	AT5G13820	OS02G0817800	17.1745	0.785546	0.102812
RLP50	AT4G13920	OS12G0211500	23.6816	0.785996	0.183458
RLP50	AT4G13920	OS12G0215950	24.3083	0.785996	0.300267
copper-binding	AT3G24450	OS05G0534500	44.375	0.786237	0.175088
copper-binding	AT3G24450	OS01G0719600	52.1127	0.786237	0.144724
protein binding	AT3G13225	OS06G0298400	31.2791	0.786999	0.0467447
binding	AT2G28540	OS01G0209500	46.3158	0.788538	0.695813
-	AT2G20930	OS09G0541500	79.7203	0.790956	0.0581091
-	AT2G20930	OS09G0541500	79.7203	0.790956	0.125248
kinase	AT2G24230	OS08G0276400	56.4692	0.791231	0.0316676
TENA	AT3G16990	OS03G0306900	50.6438	0.791452	0.223181
HTA10	AT1G51060	OS07G0545400	85.9259	0.792715	0.0970043
-	AT1G63060	OS11G0533400	27.5449	0.793641	0.0155416
HAC2	AT1G67220	OS01G0246100	24.2163	0.795921	0.0320541
HAC2	AT1G67220	OS01G0246100	24.2163	0.795921	0.0461613
dehydration-responsive	AT4G10440	OS06G0103900	66.2441	0.797498	0.136546
EMB1691	AT4G09980	OS01G0267100	52.6178	0.797585	0.0795974
SQE3	AT4G37760	OS03G0231700	70.4198	0.799144	0.203314
SQE3	AT4G37760	OS03G0231800	71.6981	0.799144	0.203314
EXO70G1	AT4G31540	OS06G0698600	56.2594	0.800087	0.187164
EXO70G1	AT4G31540	OS06G0698600	56.2594	0.800087	0.18854
EXO70G1	AT4G31540	OS06G0698600	56.2594	0.800087	0.311665
CTP synthase/ catalytic	AT4G20320	OS01G0616900	62.3748	0.800112	0.0646379
CTP synthase/ catalytic	AT4G20320	OS05G0573300	69.9013	0.800112	0.0110754
CTP synthase/ catalytic	AT4G20320	OS05G0573300	69.9013	0.800112	0.0144275
DOMON	AT5G54830	OS06G0649700	55.6667	0.800112	0.193478
TT16	AT5G23260	OS06G0667200	31.7647	0.804267	0.265941
emb1507	AT1G20960	OS02G0107000	70.6633	0.804811	0.343715
-	AT5G13030	OS06G0320700	68.5303	0.804989	0.0283488
LEA	AT1G52690	OS01G0705200	31.1628	0.806613	0.0082569
LEA	AT1G52690	OS05G0542500	38	0.806613	0.0306406
splicing factor	AT4G38780	OS06G0167000	90.2655	0.80709	0.0829472
nuclease	AT1G34380	OS01G0874800	51.9553	0.807162	0.114389
BPM2	AT3G06190	OS07G0655300	63.8249	0.807602	0.0592871
mRNA capping enzyme	AT3G09100	OS11G0217500	53.7267	0.808258	0.0425259
mRNA capping enzyme	AT3G09100	OS12G0193200	61.0526	0.808258	0.743358
F-box	AT1G26930	OS11G0602800	46.2963	0.808362	0.134194
-	AT4G29440	OS01G0706400	22.3433	0.80938	0.22062
-	AT4G29440	OS01G0706400	22.3433	0.80938	0.39088
-	AT3G51400	OS11G0160000	23.1834	0.809568	0.6174
oxidoreductase	AT1G79870	OS01G0228600	64.8734	0.810419	0.0690094
nuclear movement	AT4G27890	OS02G0743800	26.3305	0.810449	0.200396
SFR6	AT4G04920	OS10G0498700	64.0277	0.812886	0.110898
RanBP1	AT3G15970	OS05G0349500	37.7119	0.814688	0.0516482
pathogenesis	AT4G07820	OS12G0633400	12.6794	0.815447	0.232378
CYP721A1	AT1G75130	OS05G0405500	37.6963	0.81778	0.685337
CYP721A1	AT1G75130	OS05G0405600	44.3137	0.81778	0.0400994
CYP721A1	AT1G75130	OS05G0405600	44.3137	0.81778	0.57591
-	AT3G14750	OS07G0508200	34.8315	0.818118	0.0708884
NFD4	AT2G17560	OS04G0564600	31.8182	0.818938	0.021234
NFD4	AT2G17560	OS04G0564600	31.8182	0.818938	0.0935896
NFD4	AT2G17560	OS02G0670400	40	0.818938	0.0324144
-	AT4G32460	OS03G0328501	34.7267	0.819422	0.154278
-	AT4G32460	OS01G0611000	63.2708	0.819422	0.252118
KCS3	AT1G07720	OS03G0382100	50.7495	0.820333	0.857119
-	AT5G01470	OS03G0826700	57.2	0.822873	0.0379648
RAPTOR1B	AT3G08850	OS11G0109933	58.3146	0.823393	0.195493
RAPTOR1B	AT3G08850	OS12G0110000	65.4589	0.823393	0.195493
RAPTOR1B	AT3G08850	OS12G0110000	65.4589	0.823393	0.828164
CKL2	AT1G72710	OS05G0593800	70.8245	0.823967	0.367852
PEPKR2	AT1G12680	OS09G0466900	55.6291	0.824027	0.0979542
PEPKR2	AT1G12680	OS09G0466900	55.6291	0.824027	0.157811
PEPKR2	AT1G12680	OS09G0466900	55.6291	0.824027	0.656064
CP29	AT3G53460	OS03G0376600	56.9811	0.826998	0.945858
CDP-diglyceride synthetase	AT4G22340	OS10G0327300	68.8372	0.827352	0.0400994
CRR28	AT1G59720	OS07G0191500	53.2727	0.829473	0.179055
AHP1	AT2G33620	OS09G0491708	49.0251	0.832625	0.0260254
-	AT1G79060	OS02G0165500	32.7586	0.835758	0.0685653
-	AT1G79060	OS06G0675200	37.3786	0.835758	0.204728
-	AT2G46540	OS01G0705500	69.8113	0.840635	0.0210404
-	AT3G21310	OS03G0731050	49.7664	0.844527	0.0602514
pectate lyase	AT3G55140	OS01G0546800	60.4396	0.845688	0.271769
VSR1	AT3G52850	OS12G0116000	64.2857	0.845924	0.209689
VSR1	AT3G52850	OS03G0335300	68.949	0.845924	0.189444
VSR1	AT3G52850	OS03G0335300	68.949	0.845924	0.268636
VSR1	AT3G52850	OS11G0116550	74.9201	0.845924	0.0403984
nuclease	AT5G61780	OS04G0402200	49.7159	0.846876	0.146176
nuclease	AT5G61780	OS02G0523500	64.9087	0.846876	0.0102713
nuclease	AT5G61780	OS02G0523500	64.9087	0.846876	0.0721273
IRT3	AT1G60960	OS05G0198400	53.3854	0.84802	0.326249
IRT3	AT1G60960	OS06G0566300	59.8972	0.84802	0.907342
ASP1	AT2G30970	OS06G0548000	73.4341	0.849111	0.0386983
ASP1	AT2G30970	OS02G0236000	77.7778	0.849111	0.133091
-	AT2G44360	OS09G0553800	57.5342	0.849215	0.270219
-	AT5G24690	OS12G0283800	62.7119	0.849823	0.0859473
MA3	AT5G63190	OS08G0120500	67.1788	0.850715	0.414103
-	AT1G04230	OS03G0797700	56.9182	0.850715	0.618627
-	AT3G19540	OS03G0606100	66.1364	0.851865	0.275417
ubiquitin	AT5G42220	OS07G0498800	28.6567	0.852691	0.06155
FAC1	AT2G38280	OS05G0349200	87.1537	0.852775	0.188954
RUXF	AT4G30220	OS02G0177500	84.8837	0.852775	0.247617
RUXF	AT4G30220	OS11G0657300	84.8837	0.852775	0.0321949
ZIP3	AT2G32270	OS08G0207500	40.6566	0.853898	0.0921011
ZIP3	AT2G32270	OS05G0472700	45.8924	0.853898	0.310718
ZIP3	AT2G32270	OS07G0232800	48.1793	0.853898	0.127275
protein transport SEC61 gamma subunit	AT3G48570	OS06G0653900	85.5072	0.855038	0.319653
PSBS	AT1G44575	OS01G0869800	71.2687	0.857417	0.360039
PSBS	AT1G44575	OS04G0690800	72.0472	0.857417	0.277517
glucosamine/galactosamine-6-phosphate isomerase	AT3G49360	OS08G0547100	39.4495	0.858693	0.0888817
protein binding	AT2G31440	OS02G0272600	65.8635	0.858693	0.0439669
-	AT2G31725	OS11G0256200	59.4595	0.86127	0.0138404
CNX1	AT5G61790	OS04G0402100	68.3426	0.863683	0.205106
ATFD1	AT1G10960	OS08G0104600	55.3957	0.865219	0.40632
-	AT5G38700	OS01G0861400	20.2532	0.867124	0.057119
-	AT5G38700	OS01G0861400	20.2532	0.867124	0.288872
-	AT5G38700	OS03G0302800	27.5701	0.867124	0.0356077
MBAC1	AT2G33820	OS11G0423800	58.042	0.869306	0.2917
oxidoreductase	AT5G20550	OS02G0280700	42.1652	0.871869	0.0200297
hydrolase	AT3G46570	OS11G0704600	36.8644	0.872787	0.184445
hydrolase	AT3G46570	OS11G0704600	36.8644	0.872787	0.203662
ANNAT6	AT5G10220	OS06G0221200	58.6751	0.873237	0.103978
ANNAT6	AT5G10220	OS02G0753800	59.8726	0.873237	0.21218
ADT6	AT1G08250	OS04G0406600	65.5963	0.87397	0.163067
ADT6	AT1G08250	OS09G0566050	69.0418	0.87397	0.0612653
ADT6	AT1G08250	OS09G0565700	70.5736	0.87397	0.0612653
ADT6	AT1G08250	OS09G0565700	70.5736	0.87397	0.280048
lipase	AT4G26790	OS02G0189200	46.4191	0.87425	0.675337
lipase	AT4G26790	OS09G0132900	49.4318	0.87425	0.709195
lipase	AT4G26790	OS06G0636700	50.7853	0.87425	0.0153577
transmembrane	AT5G40670	OS12G0278700	63.1387	0.87512	0.257123
-	AT3G12540	OS01G0147800	34.4681	0.877508	0.105524
-	AT2G35480	OS02G0127900	37.4233	0.878885	0.476771
SRK2D	AT3G50500	OS03G0610900	77.6243	0.881399	0.958976
kinase	AT5G47070	OS06G0714900	53.8058	0.881493	0.278436
MSS3	AT2G43290	OS04G0492800	47.9592	0.882093	0.00496994
TIR1	AT3G62980	OS05G0150500	59.6252	0.882262	0.294405
ECT2	AT3G13460	OS07G0170300	38.3721	0.882316	0.347534
ACT7	AT5G09810	OS05G0438800	93.0851	0.882632	0.151552
ACT7	AT5G09810	OS10G0510000	97.0822	0.882632	0.0779594
ACT7	AT5G09810	OS03G0836000	97.3475	0.882632	0.174879
cinnamoyl-CoA reductase	AT4G30470	OS10G0576900	38.2445	0.882723	0.341953
DRD1	AT2G16390	OS03G0165266	35.7542	0.883574	0.0899626
VAN7	AT1G13980	OS03G0666100	73.9884	0.887854	0.0360348
chaperonin	AT5G06130	OS02G0535000	61.1465	0.888161	0.126635
integral membrane	AT5G19930	OS01G0507300	63.5739	0.888182	0.24075
extensin	AT5G15780	OS10G0205700	38.4058	0.888254	0.0918427
ATPase, coupled to transmembrane movement of ions, phosphorylative mechanism	AT3G13900	OS06G0565900	73.0061	0.88829	0.168626
UER1	AT1G63000	OS02G0678400	78.4566	0.888963	0.0798603
hydrolase	AT1G54280	OS06G0565900	73.6196	0.889298	0.168626
CYP707A4	AT3G19270	OS08G0472800	55.6863	0.890086	0.0120841
UPRTase	AT3G53900	OS05G0455700	56.1462	0.890086	0.00913663
PUX4	AT4G04210	OS06G0634600	34.8115	0.890846	0.488725
UBP3	AT4G39910	OS02G0573400	61.9277	0.893187	0.0101141
UBP3	AT4G39910	OS04G0452400	84.1962	0.893187	0.225806
ABC	AT3G53510	OS01G0836600	59.279	0.894399	0.367214
ABC	AT3G53510	OS05G0120200	60.9442	0.894399	0.52618
AFB2	AT3G26810	OS11G0515500	59.331	0.894399	0.0139272
AFB2	AT3G26810	OS04G0395600	66.6087	0.894399	0.0558428
pectinacetylesterase	AT3G62060	OS01G0319000	52.6316	0.894399	0.109773
pectinacetylesterase	AT3G62060	OS07G0634600	58.8808	0.894399	0.141359
pectinacetylesterase	AT3G62060	OS07G0634600	58.8808	0.894399	0.163187
MUB4	AT3G26980	OS04G0393300	48.1481	0.894493	0.0658933
MUB4	AT3G26980	OS04G0393300	48.1481	0.894493	0.146202
PUP14	AT1G19770	OS04G0587400	25.9804	0.895574	0.0773837
PUP14	AT1G19770	OS04G0587400	25.9804	0.895574	0.0936505
UBP16	AT4G24560	OS08G0478500	31.5951	0.896221	0.123873
SUS2	AT1G80070	OS06G0167000	93.5398	0.897517	0.0829472
ZDS	AT3G04870	OS07G0204900	75.0865	0.897824	0.120981
APUM6	AT4G25880	OS09G0497100	30.3644	0.898373	0.0483764
UNE12	AT4G02590	OS03G0797600	55.102	0.898768	0.0238527
UNE12	AT4G02590	OS03G0797600	55.102	0.898768	0.0972604
-	AT5G27210	OS03G0756400	53.7217	0.899274	0.405871
zinc ion binding	AT4G09560	OS08G0104300	37.7778	0.899774	0.399844
zinc ion binding	AT4G09560	OS08G0104300	37.7778	0.899774	0.642612
zinc finger	AT3G23060	OS12G0600200	22.3837	0.900326	0.0218249
zinc finger	AT3G23060	OS12G0600200	22.3837	0.900326	0.0802284
galactosyltransferase	AT1G53290	OS06G0156900	61.9565	0.90513	0.398568
-	AT5G59350	OS11G0703600	36.0324	0.906374	0.0491184
NIF	AT5G11860	OS07G0207700	42.4242	0.907803	0.0465227
NIF	AT5G11860	OS07G0207700	42.4242	0.907803	0.193478
NIF	AT5G11860	OS07G0207700	42.4242	0.907803	0.269018
-	AT5G24690	OS12G0283800	62.7119	0.907803	0.0859473
-	AT5G16060	OS03G0257900	75	0.907955	0.0238527
-	AT5G16060	OS03G0257900	75	0.907955	0.475793
hydrolase	AT3G47010	OS05G0449600	65.0943	0.908355	0.174438
nucleolar	AT5G55920	OS09G0551300	44.6352	0.909848	0.10344
-	AT1G19330	OS10G0358600	68.3721	0.9119	0.0925322
ribosome	AT1G69610	OS09G0413600	14.4366	0.912132	0.12153
-	AT1G69360	OS03G0758600	18.6082	0.912132	0.349758
ACT7	AT5G09810	OS05G0438800	93.0851	0.912314	0.151552
ACT7	AT5G09810	OS10G0510000	97.0822	0.912314	0.0779594
ACT7	AT5G09810	OS03G0836000	97.3475	0.912314	0.174879
-	AT1G33490	OS05G0105500	62.069	0.912845	0.0617854
protein transport SEC61 gamma subunit	AT3G48570	OS06G0653900	85.5072	0.914015	0.319653
-	AT2G21740	OS11G0168000	36.1111	0.91416	0.640978
F-box	AT2G44900	OS10G0563200	72.7731	0.915593	0.0981721
RPL29A	AT3G06700	OS01G0304000	81.6667	0.915593	0.1669
RPL29A	AT3G06700	OS05G0355500	81.6667	0.915593	0.120269
RPL29A	AT3G06700	OS05G0355500	81.6667	0.915593	0.220969
PB1	AT4G24690	OS04G0476800	24.5176	0.915614	0.286856
VEL1	AT4G30200	OS02G0152500	35.6475	0.917133	0.164392
monosaccharide transporter	AT1G34580	OS04G0453200	51.8738	0.917919	0.13226
-	AT1G79090	OS02G0517300	41.5951	0.917919	0.0385979
SPL10	AT1G27370	OS02G0174100	33.8645	0.917987	0.039214
DNAJ	AT5G05750	OS01G0556400	37.1053	0.918144	0.0317432
-	AT5G51510	OS10G0508600	40.1042	0.918385	0.0162479
AILP1	AT5G19140	OS11G0147800	69.1983	0.91856	0.764867
MFP2	AT3G06860	OS05G0362100	61.7204	0.919149	0.012992
MFP2	AT3G06860	OS05G0155000	66.4365	0.919149	0.0139664
DNA polymerase	AT4G31400	OS04G0498900	43.2515	0.919979	0.0974759
DNA polymerase	AT4G31400	OS05G0376300	43.2515	0.919979	0.0974759
SEC14 cytosolic factor	AT4G39170	OS01G0701900	47.839	0.919979	0.248964
SDR	AT1G01800	OS04G0531700	43.1193	0.920815	0.361255
TF	AT1G11950	OS09G0393200	55.6355	0.921167	0.0879951
TF	AT1G11950	OS09G0393200	55.6355	0.921167	0.215714
TF	AT1G11950	OS09G0393200	55.6355	0.921167	0.234856
FEI1	AT1G31420	OS03G0266800	68.5185	0.921418	0.104245
POT	AT3G45690	OS01G0960900	32.13	0.92338	0.00296166
E1 ALPHA	AT1G59900	OS06G0246500	69.598	0.923648	0.0403816
-	AT5G11500	OS05G0221400	73.7374	0.926358	0.106708
SCL8	AT5G52510	OS04G0580300	36.3489	0.929261	0.0465663
TOM7.1	AT5G41685	OS05G0583400	40	0.930227	0.0756516
RPC14	AT2G29540	OS12G0194700	39.8148	0.930259	0.0482634
PSP	AT1G18640	OS12G0502400	53.2203	0.930283	0.05616
PSP	AT1G18640	OS11G0629500	58.7838	0.930283	0.137578
U2AF35A	AT1G27650	OS09G0491756	67.2414	0.930623	0.0422571
EDA7	AT3G56990	OS06G0128400	63.8444	0.931324	0.339231
WPP2	AT1G47200	OS03G0209000	35.4839	0.932831	0.115717
hydrolase	AT5G55180	OS07G0539300	35.7019	0.935649	0.0441375
hydrolase	AT5G55180	OS07G0538000	37.6344	0.935649	0.511405
REF4	AT2G48110	OS07G0211200	60.6952	0.935919	0.0296528
kinase	AT1G19600	OS01G0105900	64.1161	0.937937	0.0704302
ARLA1B	AT3G49860	OS03G0200800	67.9348	0.939089	0.0163561
TOPP1	AT2G29400	OS03G0268000	81.677	0.939089	0.195868
-	AT3G56820	OS01G0810200	55.3097	0.939089	0.0552347
POLGAMMA2	AT1G50840	OS08G0175300	54.5983	0.940225	0.318183
POLGAMMA2	AT1G50840	OS08G0175300	54.5983	0.940225	0.381905
POLGAMMA2	AT1G50840	OS08G0175300	54.5983	0.940225	0.840872
GDP-mannose pyrophosphorylase	AT3G55590	OS08G0237200	81.7175	0.94183	0.13317
GDP-mannose pyrophosphorylase	AT3G55590	OS01G0847200	81.9945	0.94183	0.13317
CPK15	AT4G21940	OS07G0515100	68.6679	0.942009	0.0146562
-	AT5G60210	OS01G0834100	27.1709	0.942418	0.0180601
RNA binding	AT1G33680	OS08G0110800	22.619	0.942872	0.263376
RNA binding	AT1G33680	OS08G0110800	22.619	0.942872	0.388982
U-box	AT1G01670	OS10G0548850	20.4938	0.94379	0.00848062
U-box	AT1G01670	OS10G0552400	20.6497	0.94379	0.137395
nuclease	AT1G54440	OS10G0437200	38.8753	0.94506	0.0698543
nuclease	AT1G54440	OS10G0437200	38.8753	0.94506	0.1035
GLP10	AT3G62020	OS01G0249200	62.5551	0.945689	0.0746632
GLP10	AT3G62020	OS05G0277500	64.7059	0.945689	0.170747
RSW9	AT5G42080	OS05G0556100	84.5649	0.946116	0.182806
transducin	AT4G07410	OS03G0735100	53.6555	0.94658	0.0581091
LTP5	AT3G51600	OS05G0477900	39.759	0.948128	0.911795
protease	AT2G36670	OS01G0777200	52.7778	0.948128	0.290697
fringe	AT1G01570	OS02G0681100	51.7442	0.948487	0.254741
SRF6	AT1G53730	OS03G0397700	45.5598	0.951318	0.0157896
SRF6	AT1G53730	OS03G0397700	45.5598	0.951318	0.20558
SRF6	AT1G53730	OS07G0618400	54.0984	0.951318	0.0262235
SRF6	AT1G53730	OS03G0183800	59.3315	0.951318	0.0809701
SPY	AT3G11540	OS08G0559300	73.8943	0.952091	0.0265999
kinase	AT1G50990	OS03G0132800	54.8023	0.954104	0.0247637
bHLH	AT1G05805	OS01G0900800	32.2997	0.954757	0.0395966
NUP155	AT1G14850	OS06G0305200	60.4746	0.955236	0.0323117
HVA22B	AT5G62490	OS06G0226600	41.9689	0.956297	0.022107
copper amine oxidase	AT2G42490	OS04G0476100	87.2587	0.958944	0.124088
aldose 1-epimerase	AT5G57330	OS02G0176900	62.9747	0.960227	0.9409
-	AT1G03610	OS02G0827400	50.9554	0.961106	0.387885
MYB6	AT4G09460	OS01G0874300	45.993	0.961248	0.0234217
kinase	AT2G28590	OS03G0283900	45.7364	0.963124	0.0497257
APUM11	AT4G08840	OS03G0191700	24.8588	0.965734	0.0158825
zinc finger	AT3G02290	OS01G0926200	43.6681	0.965762	0.191266
COL9	AT3G07650	OS06G0298200	51.7157	0.966185	0.310489
COL9	AT3G07650	OS02G0724000	51.8428	0.966185	0.0367056
glycosyltransferase	AT2G37585	OS03G0276900	46.7662	0.966987	0.0259801
importin beta-2 subunit	AT4G27640	OS03G0261900	65.0307	0.968814	0.115811
TRFL4	AT3G53790	OS02G0817800	5.26316	0.968814	0.102812
kinase	AT5G39020	OS01G0690800	30.3951	0.969639	0.583965
kinase	AT5G39020	OS01G0690800	30.3951	0.969639	0.899298
kinase	AT5G39020	OS05G0550700	46.1326	0.969639	0.019686
kinase	AT5G39020	OS04G0177000	46.5753	0.969639	0.164861
FLA3	AT2G24450	OS04G0283600	29.8561	0.970587	0.95669
KUP1	AT2G30070	OS06G0671000	51.928	0.970587	0.527201
FBL3	AT5G01720	OS12G0108500	48.2066	0.97093	0.268885
ACT7	AT5G09810	OS05G0438800	93.0851	0.971828	0.151552
ACT7	AT5G09810	OS10G0510000	97.0822	0.971828	0.0779594
ACT7	AT5G09810	OS03G0836000	97.3475	0.971828	0.174879
tRNA syn	AT5G26710	OS10G0369000	68.1627	0.971828	0.39978
QRT2	AT3G07970	OS03G0808000	37.4459	0.971933	0.351615
-	AT5G56240	OS04G0471400	16.5456	0.972192	0.0435005
VLN2	AT2G41740	OS03G0356700	62.4224	0.972678	0.0654578
RH30	AT5G63120	OS01G0911100	69.1824	0.972882	0.0164725
RH30	AT5G63120	OS01G0911100	69.1824	0.972882	0.0254556
SUS2	AT5G49190	OS03G0340500	73.9184	0.97375	0.0856562
-	AT5G07330	OS11G0533400	34.7305	0.97375	0.0155416
cytochrome c oxidase	AT5G61310	OS12G0561000	82.5397	0.974099	0.0382978
cytochrome c oxidase	AT5G61310	OS12G0561000	82.5397	0.974099	0.0414529
cytochrome c oxidase	AT5G61310	OS12G0561000	82.5397	0.974099	0.0688323
emb2734	AT5G19820	OS03G0701000	56.9358	0.974812	0.2069
kinase	AT4G02010	OS01G0253100	59.322	0.974812	0.0896284
kinase	AT4G02010	OS01G0253100	59.322	0.974812	0.553328
RTNLB12	AT3G54120	OS04G0367400	36.1502	0.975466	0.0131679
RTNLB12	AT3G54120	OS04G0367400	36.1502	0.975466	0.119041
IDD5	AT2G02070	OS04G0566400	36.0522	0.975665	0.0806169
IDD5	AT2G02070	OS09G0555700	40.9346	0.975665	0.153045
[truncated: 50 more rows]

## Sheet: Fl vs Fl-1xg Q value filtered
Supplementary Table 5.4
Data in Suplpementary table 5.3 filtered for Q values of both Arabidopsis and Rice data Q<0.05. adjusted p-values corrected for multiple testing (Q-value). Overlp in the Q<0.05 filtered gene lists from Tables 5.2 and 5.4 are also shown.
Arabidopsis Gene Name	Arabidopsis Locus ID	Rice Ortholog Gene_id	% identity of rice ortholog to Arabidopsis gene	adj.P-Val for Arabidopsis data	adj.P.Val for Rice data				Overlap in genes showingdifferential expression in flight vs ground control (Table 5.2) and also showing differential expression in the flight vs on-orbit 1xg centrifuge control
CYP72A15	AT3G14690	OS01G0627500	9.56023	0.00375379	0.00191364				CYP72A15	AT3G14690	OS01G0627500
CYP72A13	AT3G14660	OS01G0627500	9.36903	0.0356788	0.00191364				CYP72A13	AT3G14660	OS01G0627500
HSP23.5-M	AT5G51440	OS02G0758000	37.7273	0.00666224	0.00223143				HSP23.5-M	AT5G51440	OS02G0758000
nodulin	AT2G39210	OS12G0637700	51.5679	0.0204665	0.00441845				nodulin	AT2G39210	OS12G0637700
CYP72A15	AT3G14690	OS01G0627600	44.5783	0.00375379	0.005295				CYP72A15	AT3G14690	OS01G0627600
CYP72A13	AT3G14660	OS01G0627600	43.8554	0.0356788	0.005295				CYP72A13	AT3G14660	OS01G0627600
ZIGA4	AT1G08680	OS03G0323500	34.4444	0.0394706	0.005295				ZIGA4	AT1G08680	OS03G0323500
-	AT4G32870	OS01G0198900	23.6111	0.00111881	0.00571908				-	AT4G32870	OS01G0198900
calcium ion binding	AT3G25600	OS05G0577500	57.2254	0.0443176	0.00580646				calcium ion binding	AT3G25600	OS05G0577500
FUC1	AT2G28100	OS04G0560400	55.0388	0.0293654	0.00676833				FUC1	AT2G28100	OS04G0560400
CYP72A15	AT3G14690	OS01G0627800	50	0.00375379	0.00720461				CYP72A15	AT3G14690	OS01G0627800
CYP72A13	AT3G14660	OS01G0627800	50.9363	0.0356788	0.00720461				CYP72A13	AT3G14660	OS01G0627800
-	AT4G32870	OS01G0198900	23.6111	0.00111881	0.00742267				-	AT4G32870	OS01G0198900
MGDC	AT2G11810	OS08G0299400	70.098	0.00348021	0.00757156				MGDC	AT2G11810	OS08G0299400
MGD2	AT5G20410	OS08G0299400	71.3235	0.0179558	0.00757156				MGD2	AT5G20410	OS08G0299400
myb	AT5G61620	OS08G0151000	27.7286	0.000463733	0.00849475				myb	AT5G61620	OS08G0151000
RAD23-3	AT3G02540	OS08G0430200	56.1576	0.0479477	0.00907143				RAD23-3	AT3G02540	OS08G0430200
transducin	AT1G80670	OS01G0635400	73.8372	0.0417781	0.00913663				transducin	AT1G80670	OS01G0635400
PP2C	AT5G06750	OS02G0685600	68.2171	0.0242653	0.00917259				PP2C	AT5G06750	OS02G0685600
RNS1	AT2G02990	OS08G0434100	53.7118	0.00297369	0.0093055				RNS1	AT2G02990	OS08G0434100
embryo-abundant	AT4G22530	OS01G0716500	45.2471	0.0025002	0.0102231				embryo-abundant	AT4G22530	OS01G0716500
SQD2	AT5G01220	OS01G0142300	72.0183	0.0452869	0.0110754				SQD2	AT5G01220	OS01G0142300
ACR3	AT1G76990	OS02G0555600	56.9647	0.00542137	0.0111164				ACR3	AT1G76990	OS02G0555600
zinc finger	AT4G25610	OS09G0570200	34.4383	0.018863	0.0111164				zinc finger	AT4G25610	OS09G0570200
NSP5	AT5G48180	OS09G0249000	49.3976	0.00119045	0.0118281				NSP5	AT5G48180	OS09G0249000
embryo-abundant	AT4G22530	OS01G0716500	45.2471	0.0025002	0.0118977				embryo-abundant	AT4G22530	OS01G0716500
malate dehydrogenase (NADP), chloroplast	AT5G58330	OS08G0562100	75.7506	0.00647056	0.012173				malate dehydrogenase (NADP), chloroplast	AT5G58330	OS08G0562100
PP2-A13	AT3G61060	OS02G0224900	35.443	0.00196214	0.012351				PP2-A13	AT3G61060	OS02G0224900
PP2-A11	AT1G63090	OS02G0224900	36.2869	0.0114153	0.012351				PP2-A11	AT1G63090	OS02G0224900
MATE efflux	AT1G66760	OS05G0554000	46.3235	0.011258	0.0125922				MATE efflux	AT1G66760	OS05G0554000
-	AT5G24460	OS06G0712200	44.3983	0.0216963	0.0125922				-	AT5G24460	OS06G0712200
GLY3	AT1G53580	OS01G0667200	59.0164	0.0105904	0.0126112				GLY3	AT1G53580	OS01G0667200
PHS2	AT3G46970	OS01G0851700	79.0725	0.0216963	0.0128853				PHS2	AT3G46970	OS01G0851700
ERF1-1	AT5G47880	OS07G0587400	85.8124	0.0422746	0.0133449				ERF1-1	AT5G47880	OS07G0587400
COP1-interacting	AT5G43310	OS07G0445600	32.5553	0.000494995	0.0133518				COP1-interacting	AT5G43310	OS07G0445600
protein binding	AT1G10650	OS02G0130300	35.5685	0.0135261	0.014023				protein binding	AT1G10650	OS02G0130300
agenet	AT5G52070	OS05G0140600	26.6667	0.046142	0.0142922				agenet	AT5G52070	OS05G0140600
-	AT3G61870	OS02G0122500	60.5735	0.0013914	0.0149563				-	AT3G61870	OS02G0122500
TMP-C	AT4G00430	OS02G0823100	82.9861	0.00449785	0.0151913				TMP-C	AT4G00430	OS02G0823100
-	AT1G77890	OS07G0626300	38.4259	0.000597038	0.0151984				-	AT1G77890	OS07G0626300
-	AT1G77220	OS05G0516900	61.0656	0.0215578	0.0153555				-	AT1G77220	OS05G0516900
myb	AT5G05790	OS01G0853700	38.796	0.0246948	0.0157306				myb	AT5G05790	OS01G0853700
kinase	AT1G16260	OS12G0615300	28.8204	0.00030487	0.0157896				kinase	AT1G16260	OS12G0615300
kinase	AT1G80640	OS08G0285600	41.9525	0.00281376	0.0157896				kinase	AT1G80640	OS08G0285600
IAA17	AT1G04250	OS12G0601300	49.0975	0.0206641	0.0180827				IAA17	AT1G04250	OS12G0601300
TRXF1	AT3G02730	OS01G0913000	52.9412	0.0114153	0.0194206				TRXF1	AT3G02730	OS01G0913000
IQD28	AT1G14380	OS01G0716200	29.0941	0.0353782	0.0194613				IQD28	AT1G14380	OS01G0716200
AAA-type ATPase	AT3G28540	OS07G0192000	42.6357	0.000619621	0.0197908				AAA-type ATPase	AT3G28540	OS07G0192000
-	AT5G22270	OS04G0684600	34.5679	0.000401108	0.0200648				-	AT5G22270	OS04G0684600
PPR	AT5G04810	OS04G0684500	54.0511	0.0156273	0.0200648				PPR	AT5G04810	OS04G0684500
YCF37	AT2G23670	OS02G0815300	30.9783	0.00434258	0.0201016				YCF37	AT2G23670	OS02G0815300
PII	AT4G01900	OS05G0133100	50	0.016512	0.0201391				PII	AT4G01900	OS05G0133100
FH2	AT2G43800	OS01G0897700	50	0.0334744	0.0201633				FH2	AT2G43800	OS01G0897700
protease	AT1G25510	OS01G0140100	52.5794	0.0464918	0.0201965				protease	AT1G25510	OS01G0140100
SRK2H	AT5G63650	OS04G0432000	77.4373	0.00367664	0.0207655				SRK2H	AT5G63650	OS04G0432000
-	AT5G22270	OS01G0863500	26.3566	0.000401108	0.0212678				-	AT5G22270	OS01G0863500
DFL1	AT5G54510	OS01G0221100	34.1991	0.0141225	0.0214643				DFL1	AT5G54510	OS01G0221100
DFL1	AT5G54510	OS01G0221100	34.1991	0.0141225	0.0215287				DFL1	AT5G54510	OS01G0221100
CPK13	AT3G51850	OS05G0467000	78.0622	0.0164872	0.0217295				CPK13	AT3G51850	OS05G0467000
HSP18.2	AT5G59720	OS03G0266300	70.1863	0.0212295	0.0219958				HSP18.2	AT5G59720	OS03G0266300
HSP17.6C-CI	AT1G53540	OS03G0266300	69.5652	0.0463804	0.0219958				HSP17.6C-CI	AT1G53540	OS03G0266300
anac016	AT1G34180	OS09G0493700	20.9402	0.0172134	0.0236993				anac016	AT1G34180	OS09G0493700
bHLH	AT1G03040	OS03G0797600	52.0408	0.0278877	0.0238527				bHLH	AT1G03040	OS03G0797600
SCABP5	AT4G17615	OS10G0564800	77.4648	0.0477868	0.023885				SCABP5	AT4G17615	OS10G0564800
CPK13	AT3G51850	OS01G0832300	77.4955	0.0164872	0.0242921				CPK13	AT3G51850	OS01G0832300
nodulin	AT2G39210	OS12G0637700	51.5679	0.0204665	0.0250777				nodulin	AT2G39210	OS12G0637700
-	AT2G32380	OS03G0646400	44.5783	0.0337989	0.0251711				-	AT2G32380	OS03G0646400
protein binding	AT1G24440	OS01G0905700	45.6349	0.0388203	0.0261474				protein binding	AT1G24440	OS01G0905700
RING1B	AT1G03770	OS01G0796700	31.9018	0.0348282	0.02622				RING1B	AT1G03770	OS01G0796700
-	AT5G10695	OS08G0230600	30.8642	0.00186848	0.0265616				-	AT5G10695	OS08G0230600
PAT1	AT5G48150	OS07G0583600	50.9191	0.00550241	0.0273652				PAT1	AT5G48150	OS07G0583600
glucosyl transferase	AT3G11340	OS07G0241800	37.5546	0.000199237	0.0289144				glucosyl transferase	AT3G11340	OS07G0241800
CYP72A15	AT3G14690	OS05G0372300	50.4817	0.00375379	0.0294148				CYP72A15	AT3G14690	OS05G0372300
CYP72A13	AT3G14660	OS05G0372300	49.9037	0.0356788	0.0294148				CYP72A13	AT3G14660	OS05G0372300
zinc finger	AT5G27420	OS06G0218300	26.0181	0.00101586	0.0295015				zinc finger	AT5G27420	OS06G0218300
-	AT1G27510	OS01G0107900	44.9761	0.0350531	0.0300205				-	AT1G27510	OS01G0107900
SKP2A	AT1G21410	OS05G0425700	63.5638	0.0121795	0.0303144				SKP2A	AT1G21410	OS05G0425700
AAA-type ATPase	AT1G64110	OS05G0584600	61.5205	0.0241297	0.0308385				AAA-type ATPase	AT1G64110	OS05G0584600
PP2-A13	AT3G61060	OS10G0522400	46.6667	0.00196214	0.0310732				PP2-A13	AT3G61060	OS10G0522400
PP2-A11	AT1G63090	OS10G0522400	40	0.0114153	0.0310732				PP2-A11	AT1G63090	OS10G0522400
glycoprotein	AT2G39050	OS01G0104400	45.8955	0.0452912	0.0312491				glycoprotein	AT2G39050	OS01G0104400
-	AT1G21560	OS05G0423200	15.8568	0.00973666	0.0315487				-	AT1G21560	OS05G0423200
zinc finger	AT5G27420	OS03G0188200	27.1955	0.00101586	0.0315536				zinc finger	AT5G27420	OS03G0188200
glycoprotein	AT2G39050	OS01G0104400	45.8955	0.0452912	0.0315536				glycoprotein	AT2G39050	OS01G0104400
kinase	AT5G58150	OS08G0276400	43.289	0.0140235	0.0316676				kinase	AT5G58150	OS08G0276400
ACHT4	AT1G08570	OS03G0326500	54.5455	0.00454182	0.0317432				ACHT4	AT1G08570	OS03G0326500
kinase	AT4G23280	OS07G0540100	37.5	0.0101132	0.0317915				kinase	AT4G23280	OS07G0540100
zinc ion binding	AT1G02750	OS12G0556100	26.1468	0.00425446	0.0327347				zinc ion binding	AT1G02750	OS12G0556100
SRK2H	AT5G63650	OS01G0869900	67.9612	0.00367664	0.0329356				SRK2H	AT5G63650	OS01G0869900
pyrophosphate-dependent 6-phosphofructose-1-kinase	AT1G76550	OS02G0714200	77.6337	0.0230849	0.0335495				pyrophosphate-dependent 6-phosphofructose-1-kinase	AT1G76550	OS02G0714200
EXPA6	AT2G28950	OS03G0822000	77.2727	0.0212076	0.0341219				EXPA6	AT2G28950	OS03G0822000
PIS2	AT4G38570	OS06G0492000	31.6456	0.0160258	0.0346149				PIS2	AT4G38570	OS06G0492000
FL5-2I22	AT5G62350	OS04G0106000	32.2034	0.00315292	0.0349173				FL5-2I22	AT5G62350	OS04G0106000
-	AT4G25170	OS02G0657700	24.4648	0.00910392	0.0352122				-	AT4G25170	OS02G0657700
U-box	AT5G09800	OS05G0439400	25.6637	0.0382942	0.0356989				U-box	AT5G09800	OS05G0439400
VAMP711	AT4G32150	OS06G0174400	72.8507	0.0451666	0.0360068				VAMP711	AT4G32150	OS06G0174400
glucosyl transferase	AT3G11340	OS07G0241800	37.5546	0.000199237	0.036019				glucosyl transferase	AT3G11340	OS07G0241800
RNA-binding cp33	AT1G01080	OS08G0117100	36.0502	0.0337989	0.037589				RNA-binding cp33	AT1G01080	OS08G0117100
xanthine/uracil permease	AT3G10960	OS05G0332600	68.523	0.0373949	0.0380118				xanthine/uracil permease	AT3G10960	OS05G0332600
RMA1	AT4G03510	OS04G0530500	26.087	0.000290434	0.0381678				RMA1	AT4G03510	OS04G0530500
VAMP728	AT3G24890	OS03G0165800	27.3543	0.0419622	0.0382978				VAMP728	AT3G24890	OS03G0165800
SRK2H	AT5G63650	OS02G0551100	73.9726	0.00367664	0.0384864				SRK2H	AT5G63650	OS02G0551100
CDF2	AT5G39660	OS01G0277500	30.5054	0.0105904	0.0385859				CDF2	AT5G39660	OS01G0277500
RMA1	AT4G03510	OS02G0639800	24.4755	0.000290434	0.0392277				RMA1	AT4G03510	OS02G0639800
ACR3	AT1G76990	OS02G0555600	56.9647	0.00542137	0.0396021				ACR3	AT1G76990	OS02G0555600
NHL3	AT5G06320	OS01G0864300	26.1411	0.00153351	0.0403984				NHL3	AT5G06320	OS01G0864300
HIN1	AT2G35460	OS01G0864300	30.2905	0.0122917	0.0403984				HIN1	AT2G35460	OS01G0864300
EBF2	AT5G25350	OS06G0605900	41.6268	0.0164778	0.0407148				EBF2	AT5G25350	OS06G0605900
CYP81D5	AT4G37320	OS03G0760200	42.3002	0.0290461	0.0407963				CYP81D5	AT4G37320	OS03G0760200
CYP81D1	AT3G28740	OS03G0760200	39.3762	0.0399978	0.0407963				CYP81D1	AT3G28740	OS03G0760200
hydrolase	AT2G32150	OS03G0701200	46.0145	0.000139	0.04135				hydrolase	AT2G32150	OS03G0701200
PGIP1	AT5G06860	OS05G0104700	36.409	0.000892482	0.042083				PGIP1	AT5G06860	OS05G0104700
PGIP2	AT5G06870	OS05G0104700	35.9102	0.00386594	0.042083				PGIP2	AT5G06870	OS05G0104700
ethylene-responsive	AT2G31730	OS04G0493100	42.9487	0.0465331	0.0425684				ethylene-responsive	AT2G31730	OS04G0493100
NRT2;1AT	AT1G08090	OS02G0112100	71.4822	0.0202944	0.0426027				NRT2;1AT	AT1G08090	OS02G0112100
NRT2;1AT	AT1G08090	OS02G0112600	71.4822	0.0202944	0.0426027				NRT2;1AT	AT1G08090	OS02G0112600
FL5-2I22	AT5G62350	OS06G0711800	36.5	0.00315292	0.0427063				FL5-2I22	AT5G62350	OS06G0711800
PGIP1	AT5G06860	OS05G0104700	36.409	0.000892482	0.042962				PGIP1	AT5G06860	OS05G0104700
PGIP2	AT5G06870	OS05G0104700	35.9102	0.00386594	0.042962				PGIP2	AT5G06870	OS05G0104700
proline-rich	AT1G64450	OS05G0238400	39.485	0.0112439	0.0433599				proline-rich	AT1G64450	OS05G0238400
DNAJ	AT2G21510	OS05G0543700	64.497	0.00332555	0.0438064				DNAJ	AT2G21510	OS05G0543700
PGDH	AT1G17745	OS08G0447000	69.7262	0.0302269	0.0443027				PGDH	AT1G17745	OS08G0447000
MUM2	AT5G63800	OS05G0428100	48.7053	0.00962486	0.0444975				MUM2	AT5G63800	OS05G0428100
lipid-associated	AT2G22170	OS04G0456700	40.9326	0.0163639	0.0451564				lipid-associated	AT2G22170	OS04G0456700
BZO2H2	AT5G24800	OS02G0175100	31.4079	0.000832224	0.0454855				BZO2H2	AT5G24800	OS02G0175100
C2	AT1G70810	OS07G0500300	41.0405	0.0115908	0.0457174				C2	AT1G70810	OS07G0500300
C2	AT1G70790	OS07G0500300	42.7746	0.0287957	0.0457174				C2	AT1G70790	OS07G0500300
RMA1	AT4G03510	OS02G0639800	24.4755	0.000290434	0.0457301				RMA1	AT4G03510	OS02G0639800
dihydrolipoyl dehydrogenase	AT4G16155	OS01G0337900	78.2531	0.0165705	0.0457301				dihydrolipoyl dehydrogenase	AT4G16155	OS01G0337900
-	AT1G27510	OS01G0107900	44.9761	0.0350531	0.0461997				-	AT1G27510	OS01G0107900
MPK17	AT2G01450	OS01G0643800	64.2715	0.0352709	0.0470691				MPK17	AT2G01450	OS01G0643800
SPP1	AT1G51420	OS01G0376700	56.5012	0.00869072	0.0470831				SPP1	AT1G51420	OS01G0376700
-	AT2G32380	OS03G0646400	44.5783	0.0337989	0.0474396				-	AT2G32380	OS03G0646400
protein kinase C substrate, heavy chain	AT2G42390	OS01G0752400	33.8624	0.0331951	0.0475857				protein kinase C substrate, heavy chain	AT2G42390	OS01G0752400
AZF2	AT3G19580	OS12G0583700	39.2713	0.000701872	0.0476591				AZF2	AT3G19580	OS12G0583700
SPP1	AT1G51420	OS02G0143100	58.6288	0.00869072	0.0481256				SPP1	AT1G51420	OS02G0143100
TET2	AT2G19580	OS06G0572400	55.8824	0.0382462	0.048161				TET2	AT2G19580	OS06G0572400
AAA-type ATPase	AT1G64110	OS01G0226400	68.8095	0.0241297	0.0490954				AAA-type ATPase	AT1G64110	OS01G0226400
-	AT3G51720	OS07G0677900	28.9017	0.00546055	0.0496103				-	AT3G51720	OS07G0677900
-	AT3G56270	OS07G0677900	23.8921	0.0249998	0.0496103				-	AT3G56270	OS07G0677900
-	AT2G40480	OS07G0677900	27.7457	0.0350531	0.0496103				-	AT2G40480	OS07G0677900
